# Supplementary material for: Colour tuneability of heteroleptic iridium complexes through second-sphere coordination
Source: PubMed Central journal article supplement — RSC Adv. 2024 Oct 29;14(46):34288–97. doi: 10.1039/d4ra04535a (PMC11519842; doi:10.1039/d4ra04535a), 2024-10-29
Supplement: RA-014-D4RA04535A-s001.pdf [file RA-014-D4RA04535A-s001.pdf]

## Supporting Information

### **Colour Tuneability of Heteroleptic Iridium Complexes Through Second-Sphere Coordination**

Barbora Balónová, T. Harri Jones, Allison E. True, Sydney M. Hetherington and  
Barry A. Blight\*

University of New Brunswick, Department of Chemistry,  
Fredericton, New Brunswick, Canada, E3B 5A3

#### **Table of Contents**

|                                                                                          |    |
|------------------------------------------------------------------------------------------|----|
| S0: Materials and techniques                                                             | 2  |
| S1: Synthetic Routes of Ir(III) complexes <b>1-4</b>                                     | 9  |
| S2: Synthetic Procedures                                                                 | 11 |
| S3: <sup>1</sup> H and <sup>13</sup> C NMR Spectra, Mass Spectra, Elemental Analysis and | 20 |
| S4: UV-Vis, Excitation and Emission data                                                 | 36 |
| S5: K <sub>a</sub> Binding studies                                                       | 50 |
| S6: PLQYs and decay lifetimes                                                            | 54 |
| S7: PMMA solid state PLQYs and decay lifetimes                                           | 67 |
| S8: Cyclic voltammetry                                                                   | 80 |
| S9: DFT studies                                                                          | 84 |

## S0. Materials and Techniques

**Materials.** All starting materials were purchased from commercial sources (Sigma Aldrich, Fisher Scientific and TCI) and used without further purification. Analytical thin layer chromatography (TLC) was carried out on precoated TLC plates Alugram Sil G/UV254. Column chromatography purifications were done with silica gel (ultrapure, 60-200  $\mu\text{m}$  (60 Å)). Experiments were performed as follows:

(i) A conventional hotplate (IKA™ RCT Basic magnetic hot plate stirrer (Stirring range: 50 to 1500 rpm; Size: 5.3 in. dia; Supplier: IKA™ 3810001) - fumehood), under a dry  $\text{N}_2$  atmosphere using standard Schlenk Line techniques when specified.

(ii) Microwave reactor – Anton Paar-Monowave 400 (max. temp. 300°C, power 850 W and pressure of 30 bar) with 10- and 30-mL borosilicate glass vials with a cap material of PEEK. The seal material is made from Teflon-coated silicone. Supplier: Anton Paar.

**Nuclear Magnetic Resonance (NMR).**  $^1\text{H}$  (400 MHz) and  $^{13}\text{C}$  (101 MHz) NMR spectra were recorded on an Agilent 400 MR spectrometer in deuterated solvents, namely chloroform-*d* ( $\text{CDCl}_3$ ) and dimethyl sulfoxide-*d*<sub>6</sub> ( $\text{DMSO-}d_6$ ), which were purchased from Fisher Scientific. All chemical shifts are reported in  $\delta$  (ppm) referenced to tetramethylsilane ( $\text{Si}(\text{CH}_3)_4$ ) and the peak multiplicities are referred to as singlet (s), doublet (d), triplet(t), quartet (q), multiplet (m). Spin-spin coupling effect is quantify with the coupling constants, which is abbreviated with the capital letter J.

**Mass Spectrometry.** High-resolution mass spectral data measurements were performed by Xiao Feng at the Mass Spectrometry Laboratory (Dalhousie University, Halifax, Canada). High-resolution mass spectra were recorded on Bruker Daltonics MicrOTOF instrument. The ionization method used for low/high-resolution analysis was positive electrospray ionization (ESI+). The sample was introduced by a syringe pump at a flow rate of 2  $\mu$ L/min and the spray voltage applied to the ESI needle was 4.5 kV. The dry gas flow rate was 4 L/min with a pressure of 1 Bar and a temperature of 180°C. For the analysis, samples sizes were between 1-2.5 mg and the experiment was replicated 2-3 times to ensure the viability of the results (sample sizes of 5-7 mg were sent).

**Elemental Analysis.** Elemental analysis was performed by Patricia Granados at the Centre for Environmental Analysis and Remediation (Saint Mary's University, Halifax, Canada). Carbon, hydrogen, and nitrogen analyses were conducted on a PerKin Elmer 2400 Series II CHN Analyser. CHN results were processed as a percentage by weight of each element and were measured as a function of thermal conductivity. For the analysis, samples sizes were between 2.5-3.5 mg and the experiment was replicated 2-3 times to ensure the viability of the results (sample sizes of 15-20 mg were sent).

**UV-Vis Spectroscopy.** UV-Vis spectra for the cyclometalated Ir(III) complexes **1-4** were recorded with a Cary Series UV-Vis Spectrophotometer (Agilent Technologies). Chloroform – HPLC grade (C606-1, LOT 214513) was used as the blank solution and the solvent to prepare the solutions of the several Ir(III) complexes **1-4**. Two standard Q macro cuvettes with an optical path length of 10 millimetres which are made of fused quartz glass were used to measure the absorbance of these compounds. UV-Vis spectra

were collected with a concentration of the cyclometalated Ir(III) complexes **1-4** of  $1.10^{-4}$  M.

**Photoluminescence Emission Spectroscopy.** Emission and excitation spectra, PLQY, and decay lifetime measurements were recorded with a FS5 Spectrofluorometer (Edinburgh Instruments).

- Excitation and emission spectra for the cyclometalated Ir(III) complexes **1-4** were recorded with a FS5 Spectrofluorometer (Edinburgh Instruments) and a SC-05 (Standard Cuvette Holder) at 298 K. A Hellma Fluorescence Cuvette (Suprasil 6 Quartz, spectral range 200-2,500 nm, pathlength 10x4 mm and chamber volume 3,500  $\mu$ L) was used to measure the excitation and emission spectra of **1-4**. The sample solutions were prepared in chloroform – HPLC grade (C606-1, LOT 214513), which was used as a blank solution and the solvent to prepare the solutions of **1-4** (concentration of  $1.1 \cdot 10^{-5}$  –  $2.8 \cdot 10^{-6}$  M (**Table S1**)). All solutions were degassed in the cuvette for one minute (Argon) before each measurement.

- Photoluminescence quantum yields were calculated using the relative method. A solution of quinine sulphate in 0.1 M sulfuric acid (PLQY 54.6 %) was used as a reference sample for emission wavelengths between 400-480 nm. For wavelengths between 480-560 nm rhodamine 6G in ethanol (PLQY 95 %) was used as a reference and for wavelengths greater than 560 nm rhodamine B in ethanol (PLQY 56 %) was used. Ir(III) compounds **1-4** were measured at a concentration depicted in **Table S2**. Absorbance

spectra were recorded in triplicate for both the reference and Ir(III) complexes **1-4** at a fixed absorbance value below 0.1, ranging from 0.075 to 0.085. All solutions were degassed in the cuvette for 20 minutes (Ar) before each measurement.

(absorbance value recommended by Edinburgh Instruments). An average of these absorbances was used as the standard value for both the reference and the Ir(III) complexes **1-4**. Emission spectra were then recorded in triplicate for both the reference and Ir(III) complexes **1-4** with all samples being excited at 350 nm. The area under the curve of the emission scan was then calculated. An average of these integration values was used as the standard value for both the reference and the Ir(III) complexes **1-4**. Photoluminescence quantum yields for each Ir(III) complex **1-4** were then calculated using **eq. 1**, and the values reported in **Table S5**.

**Equation 1:**

$$QY \text{ of Ir(III) complexes} = QY_{ref} \times \frac{I_{sample}}{I_{ref}} \times \frac{A_{ref}}{A_{sample}} \times \frac{\eta_{sample}^2}{\eta_{ref}^2}$$

*I* = Integrated area under the emission curve

*A* = Absorbance at the wavelength of excitation maxima

*η* = Refractive index

Citation: Brouwer, A. M. (2011). Pure and Applied Chemistry, 83(12), 2213–2228 [1]

**Table S1.** Quinine sulphate, rhodamine 6G, rhodamine B and Ir(III) complexes' concentrations.

| Compound | Concentration (M <sup>-1</sup> ) |
|----------|----------------------------------|
|----------|----------------------------------|

|           |                      |
|-----------|----------------------|
| <b>1</b>  | $9.5 \cdot 10^{-6}$  |
| <b>2</b>  | $1.1 \cdot 10^{-5}$  |
| <b>3</b>  | $2.8 \cdot 10^{-6}$  |
| <b>4</b>  | $9.3 \cdot 10^{-6}$  |
| <b>RB</b> | $9.0 \cdot 10^{-6}$  |
| <b>RG</b> | $7.2 \cdot 10^{-6}$  |
| <b>QS</b> | $1.25 \cdot 10^{-5}$ |

- Decay lifetime measurements were recorded with a FS5 Spectrofluorometer (Edinburgh Instruments) and a SC-05 (Standard Cuvette Holder). All solutions of **1-4** were prepared to a concentration of  $\sim 1 \cdot 10^{-6}$  M using chloroform – HPLC grade (C606-1, LOT 214513) that was degassed in a cuvette for 20 minutes (Ar) before each measurement at 298 K. A QF2001 – 10 mm Lightpath Spectrophotometer Screw Cap Cuvette (Threaded – Quartz 3.5 mL) was used to measure the excitation spectra of each Ir(III) complexes (**1-4**). The excited state lifetimes were measured by the time correlated single photon counting spectra (TCSPC) technique using an EPLED-365 (Edinburgh Instruments) laser with emission detection at 520 nm for all complexes. Each lifetime measurement was calculated through an Exponential Fit Time Scan that follows the formula:

$$\text{Fit: } B_1 e^{(-t/\tau_1)} + B_2 e^{(-t/\tau_2)} + B_3 e^{(-t/\tau_3)} + B_4 e^{(-t/\tau_4)}$$

A chi-squared ( $\chi^2$ ) of values between 1-1.3 were found suitable. These complexes showed either monoexponential decay or biexponential decay.

**PMMA solid state PLQY and lifetime measurements.** PMMA films were prepared through an electrospinning technique using a 'VWR International KINETIC ENERGY 26 JOULES GALAXY MINI CENTREFUGE'

100 mg of 35kDA PMMA in 1 mL of dry degassed (with argon) chloroform along with 2mM of the Iridium complex **1-4**. For co-system **1-4-5** an equimolar 1:1 equivalent amount of compound **5** based upon 2mM of complex **1-4** was added to the mixture.

The mixtures were thoroughly stirred under argon until full dissolution of PMMA, and emitters. Upon full dissolution of the solids, the films were formed through dropwise electrospinning, each 1 mL solution was added 1 drop at a time between spins of the device allowing for an even coating of emitter polymer thin film mixture.

Measurements of the quantum yield in the solid state were carried out with use of an FS5 SC-30 integrating sphere module and a Xenon lamp at 25 °C. Excitation wavelengths will be specified with figures as compounds have significant variation in excitation.

$$PLQY = \frac{\# \text{ emitted photons}}{\# \text{ absorbed photons}}$$

Number of absorbed photons was inferred by comparing the difference in the excitation light scattering of the blank and the sample ( $Ex_{\text{blank}}$  and  $Ex_{\text{sample}}$ ) – whereas the number of emitted photons can be inferred by comparing the difference between the sample and the blank ( $Em_{\text{sample}}$  and  $Em_{\text{blank}}$ )

$$PLQY = \frac{Em_{\text{sample}} - Em_{\text{blank}}}{Ex_{\text{blank}} - Ex_{\text{sample}}}$$

**Cyclic Voltammetry.** CV was carried out in an argon filled glovebox using a potentiostat/galvanostat (BioLogic SP-150) with a cell consisting of a working electrode (platinum disk, 0.07 cm<sup>2</sup>), counter electrode (platinum wire, 5 cm) and Ag/Ag<sup>+</sup> reference electrode (0.01M AgNO<sub>3</sub> in 0.1 M NBu<sub>4</sub>PF<sub>6</sub> in anhydrous chloroform). All E<sub>ox</sub> and E<sub>red</sub> values were referenced to a ferrocene standard. The electrode was washed thoroughly with the electrolyte solution before each sample run. Each sample concentration was measured to be 2mM, when compound **5** was used with each of the complexes **1-4**, it was used in a 1:1 equimolar ratio to determine its effect on the oxidation and reduction potentials of the Iridium complexes.

**DFT methodology.** DFT calculations were performed using the Gaussian16 revision c.01 [2] software package provided by the University of Waterloo ([University of Waterloo](http://www.uwaterloo.ca)) through the Digital Research Alliance of Canada ([alliancecan.ca](http://alliancecan.ca)). The ground state geometries were optimised at the B3LYP [3] level using LANL2DZ [4] basis set for iridium and the 6-31G\*\* basis set for all other atoms. [4] The energy minima were confirmed using frequency analysis and the absence of any imaginary frequencies. The butyl chains on the 'guanidine' ligand were truncated to methyl groups to reduce disorder and computational costs. Time-dependant DFT (TD-DFT) was also undertaken to calculate the singlet and triplet excited energetic states. All relevant orbital and geometries are given in section S8.

All initial input structures were created using and optimised Avogadro2 1.91.0 [5]

Orbital plots were generated using Avogadro2 1.91.0 [5]

UV-vis plots were generated using GaussSum 3.0.2 [6]



## S1. Synthetic Routes of Ir(III) complexes 1-5

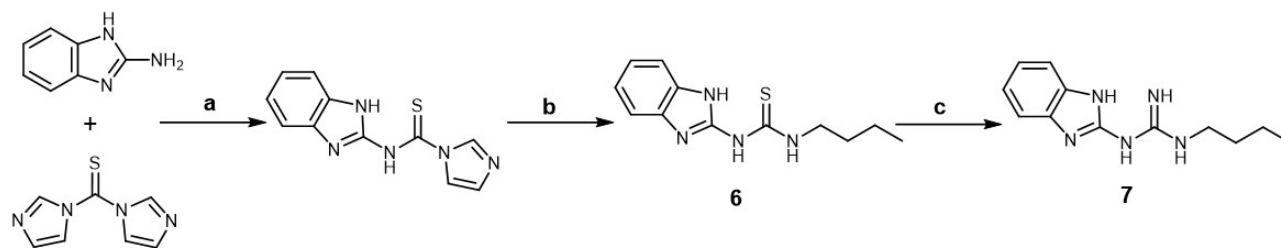

**Scheme S1.** The two-step synthetic route for the preparation of 1-(1H-benzo[d]imidazole-2-yl)-3-butylguanidine ligand. Reagents and conditions: a) acetonitrile, 50 °C, 20 h, 80 %; b) *n*-butyl amine, catalytic DMAP, DMF, 100°C, 18 h, 70 %; c) mercuric oxide, ammonia in methanol (NH<sub>3</sub>/MeOH (2M)), CHCl<sub>3</sub>, 3 h, r.t., 50 %.

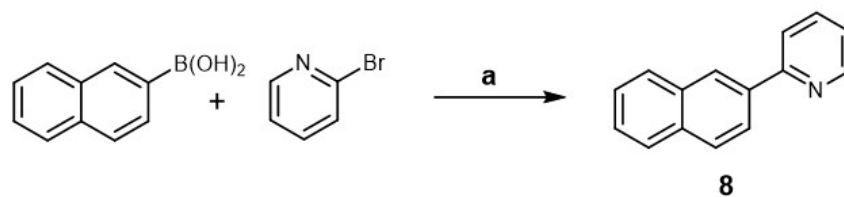

**Scheme S2.** Synthesis of ligand 8. Reagents and conditions: a) 0.5 mol % Pd(PPh<sub>3</sub>)<sub>4</sub>, Na<sub>2</sub>CO<sub>3</sub>, EtOH:H<sub>2</sub>O, (1.3 mL : 0.8 mL), M.W. irradiation, 150°C, 15 min, 67%.

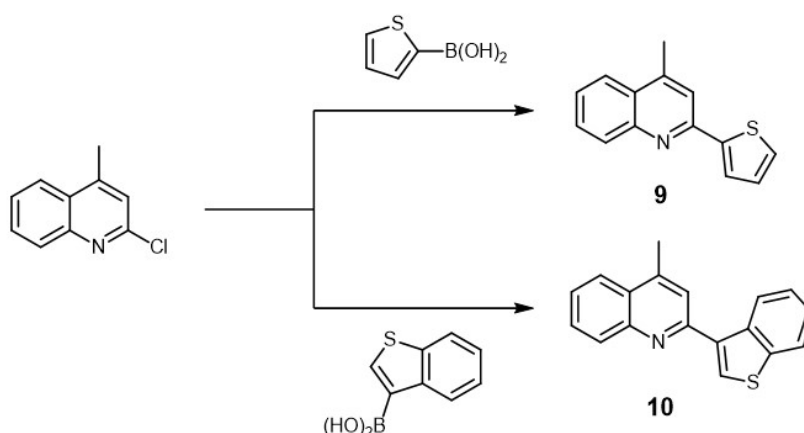

**Scheme S3.** Synthesis of ligand 9 and 10. Reagents and conditions: 3 mol % Pd(Ph<sub>3</sub>)<sub>4</sub>, 5% solution of Na<sub>2</sub>CO<sub>3</sub>, dry THF, reflux, 24 h, N<sub>2</sub> (g).

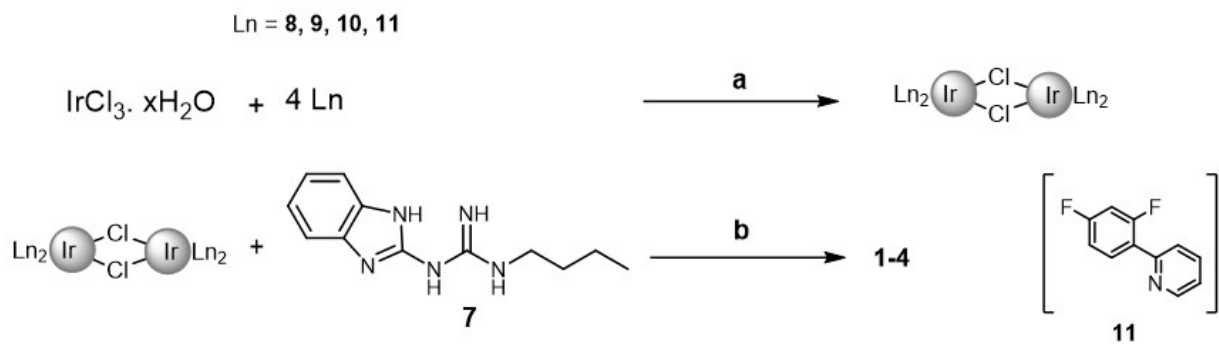

**Scheme S4.** The general synthetic route of all iridium complexes herein. Reagents and conditions: a) 2-ethoxyethanol: water (3:1), reflux, 19 h; b) 1-(1H-benzo[d]imidazole-2-yl)-3-butylguanidine **7**,  $\text{K}_2\text{CO}_3$ , toluene,  $\text{N}_2$  (g).

### Iridium dimers

All iridium  $\mu$ -chloro bridged dimers were synthesised following Nonoyama's procedure.<sup>1</sup> Iridium chloride hydrate **14** (1 equivalent) and 2 equivalents of appropriate ligand were added into a mixture of 2-ethoxyethanol: water (3:1) and refluxed for 19-24 h under nitrogen atmosphere. After cooling to room temperature, a precipitate was formed and filtered off. The solid was washed with water (5 mL), ethanol (5 mL) and acetone (5 mL) and dried on Schlenk line for 48 h.

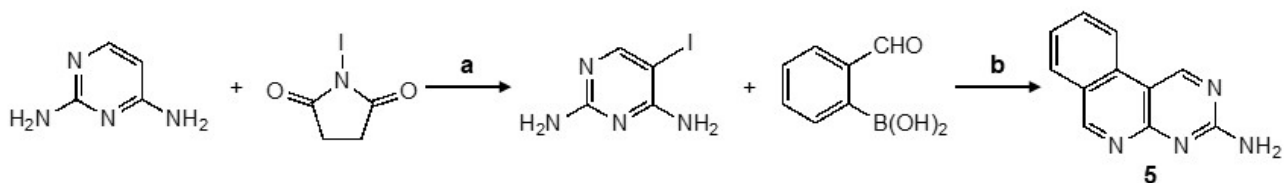

**Scheme S5.** The synthetic route of compound **5**. Reagents and conditions: a) DMF,  $0^\circ\text{C}$  to rt., 3 h, 88%; b) MW,  $\text{K}_2\text{CO}_3$ ,  $\text{Pd}(\text{PPh}_3)_4$ , dioxane:water (3:1),  $150^\circ\text{C}$ , 3h  $\text{N}_2$  (g).

## S2. Synthetic Procedures

### Iridium complex 1

Ir(dFppy) chloro-bridged dimer (64 mg, 0.052 mmol, 1.0 eq) was combined with 2.1 equivalents of (1-(1H-benzo[d]imidazole-2-yl)-3-butylguanidine) ligand **7** (25 mg, 0.11 mmol) and 10 equivalents of potassium carbonate (72 mg, 0.52 mmol) were added to 9 mL of dry toluene and refluxed under nitrogen atmosphere for 18 hours. After the reaction was completed, it was cooled to room temperature and solvent was removed under reduced pressure. The solid was re-dissolved in dichloromethane and extracted with water, organic phases were combined, and solvent removed under reduced pressure. A check of the organic layer under UV light (365 nm) resulted in active solution of green-blue (turquoise) colour. The sample was dried and subjected to purification via column chromatography (neutral alumina as stationary phase, DCM: MeOH 10:0.5 as mobile phase). Fractions were collected ( $R_f = 0.08$ , DCM: MeOH, 10: 0.5), combined and solvent was removed under reduced pressure. The final product **1** was obtained in (31.7 mg, 76%) yield.

$^1\text{H}$  NMR (400 MHz,  $\text{CDCl}_3$ , 298 K)  $\delta$ : 8.63 (dd,  $J = 5.8, 0.9$  Hz, 1H), 8.28 (d,  $J = 8.9$  Hz, 1H), 8.18 (d,  $J = 14.0$  Hz, 1H), 8.09 (dd,  $J = 5.8, 0.9$  Hz, 1H), 7.82 – 7.75 (m, 1H), 7.71 (dt,  $J = 11.6, 5.6$  Hz, 1H), 7.19 (d,  $J = 7.8$  Hz, 1H), 7.12 – 7.05 (m, 1H), 7.05 – 6.92 (m, 2H), 6.79 – 6.71 (m, 1H), 6.65 (s, 1H), 6.54 – 6.39 (m, 2H), 6.23 – 6.12 (m, 1H), 5.90 - 5.83 (m, 1H), 5.60 (dd,  $J = 8.4, 2.4$  Hz, 1H), 5.22 (s, 2H), 4.43 (s, 1H), 3.07 – 2.91 (m, 2H), 1.51 – 1.36 (m, 2H), 1.23 (dt,  $J = 14.9, 7.5$  Hz, 2H), 0.81 (dt,  $J = 22.3, 7.2$  Hz, 3H).

$^{13}\text{C}$  NMR (101 MHz,  $\text{CDCl}_3$ , 298 K)  $\delta$ : 157.14, 157.08, 156.66, 154.67, 154.61, 151.44, 149.91, 148.79, 146.10, 140.36, 138.07, 137.98, 132.52, 128.63, 128.18, 123.23, 123.03,

122.59, 122.28, 122.20, 119.36, 116.50, 114.88, 114.71, 114.16, 113.97, 111.16, 98.43, 98.16, 97.77, 41.08, 30.70, 20.08, 13.75. HMRS [ESI+] ion  $[C_{34}H_{29}F_4IrN_7]^+$  m/z calculated: 804.2044 Found: 804.2034 [M+].

## Iridium complex **2**

Iridium chloro-bridged dimer made from ligand **8** (100 mg, 0.079 mmol) was combined with 2.1 equivalents of (1-(1H-benzo[d]imidazole-2-yl)-3-butylguanidine) ligand **7** (40 mg, 0.17 mmol) and 10 equivalents of potassium carbonate (106 mg, 0.79 mmol) were added to 12 mL of dry toluene and refluxed under nitrogen atmosphere for 18 hours. After the reaction was completed, it was cooled to room temperature and solvent was removed under reduced pressure. The solid was re-dissolved in dichloromethane and extracted with water, the organic phases were combined, and solvent removed under reduced pressure. The sample was dried and subjected to purification via column chromatography (neutral alumina as stationary phase, DCM: MeOH 10:0.5 as mobile phase). Fractions were collected ( $R_f = 0.43$ , DCM: MeOH, 10:0.5), and solvent was removed under reduced pressure. The product was dried in vacuo (Schlenk line) for 48 h. The final product **2** was obtained as a dark yellow powder in (36.1 mg, 55%) yield.

$^1H$  NMR (400 MHz,  $CDCl_3$ , 298 K)  $\delta$ : 8.78 (d,  $J = 6.4$  Hz, 1H), 8.26 (d,  $J = 5.8$  Hz, 1H), 8.15 (t,  $J = 3.9$  Hz, 2H), 8.11 (s, 1H), 8.08 (d,  $J = 8.1$  Hz, 1H), 7.91 – 7.85 (m, 1H), 7.83 – 7.78 (m, 1H), 7.73 – 7.68 (m, 2H), 7.21 (dt,  $J = 6.6, 3.7$  Hz, 5H), 7.13 (t,  $J = 6.6$  Hz, 2H), 6.93 (t,  $J = 7.7$  Hz, 1H), 6.73 (s, 1H), 6.53 (s, 1H), 6.47 (t,  $J = 7.9$  Hz, 1H), 6.15 (d,  $J = 8.3$  Hz, 1H), 6.09 (s, 1H), 4.69 (s, 1H), 2.89 (ddd,  $J = 24.7, 15.2, 9.0$  Hz, 3H), 1.41 (dd,  $J = 16.0, 6.9$  Hz, 3H), 1.18 (dd,  $J = 15.1, 7.5$  Hz, 2H), 0.76 (t,  $J = 7.3$  Hz, 3H).  $^{13}C$  NMR (101 MHz,  $CDCl_3$ , 298 K)  $\delta$ : 168.30, 167.32, 150.54, 150.20, 149.06, 145.43, 145.25, 145.07,

144.57, 143.72, 140.39, 137.15, 136.99, 135.36, 135.25, 131.32, 130.20, 129.92, 129.76, 129.01, 128.93, 128.78, 126.74, 126.66, 125.96, 125.92, 124.15, 123.69, 123.62, 123.54, 123.14, 123.00, 122.70, 122.38, 119.83, 117.40, 110.61, 41.06, 30.73, 19.99, 13.77.  
HRMS m/z calculated: 832.2732. Found: 832.2734 [M+].

### **Iridium complex 3**

Iridium chloro-bridged dimer made from ligand **10** (47 mg, 0.03 mmol), (1-(1H-benzo[d]imidazole-2-yl)-3-butylguanidine) ligand **7** (20 mg, 0.088 mmol), and potassium carbonate (48 mg, 0.35 mmol) were added to 5 mL of dry toluene and refluxed under nitrogen atmosphere for 18 hours. After the reaction was completed, it was cooled to room temperature and solvent was removed under reduced pressure. The solid was re-dissolved in dichloromethane and extracted with water, organic phases were combined, and dried over magnesium sulphate and solvent was removed under reduced pressure. The sample was dried and subjected to purification via column chromatography (neutral alumina as stationary phase, DCM: MeOH 10:0.5 as mobile phase). Fractions were collected ( $R_f = 0.18$ , DCM: MeOH, 10:0.5), and solvent was removed under reduced pressure. The product was dried in vacuo (Schlenk line) for 48 h. The final product **3** was obtained in (17.5 mg, 60%) yield as a dark red powder.

$^1\text{H}$  NMR (400 MHz,  $\text{CDCl}_3$ , 298 K)  $\delta$  8.64 (d,  $J = 8.9$  Hz, 1H), 8.28 (dd,  $J = 11.1, 7.3$  Hz, 2H), 8.22 (d,  $J = 8.3$  Hz, 1H), 8.01 (t,  $J = 8.5$  Hz, 1H), 7.84 – 7.79 (m, 1H), 7.52 (d,  $J = 7.8$  Hz, 1H), 7.45 – 7.35 (m, 2H), 7.34 – 7.28 (m, 1H), 7.21 (dd,  $J = 11.5, 7.6$  Hz, 1H), 7.02 (ddd,  $J = 23.2, 14.7, 7.8$  Hz, 3H), 6.88 – 6.79 (m, 1H), 6.44 – 6.37 (m, 1H), 5.71 (d,  $J = 8.3$  Hz, 1H), 3.95 (br s, 1H), 2.97 (d,  $J = 9.6$  Hz, 6H), 1.25 (s, 2H), 1.25 – 1.19 (m,

2H), 1.09 (dd,  $J = 15.2, 7.6$  Hz, 2H), 0.71 (t,  $J = 7.3$  Hz, 3H).  $^{13}\text{C}$  NMR (400 MHz,  $\text{CDCl}_3$ , 298 K)  $\delta$ : HRMS  $m/z$  calculated: 972.2488. Found: 972.2498 [M+].

#### **Iridium complex 4**

Iridium chloro-bridged dimer made from ligand **9** (118 mg, 0.088 mmol) was combined with 2.5 equivalents of (1-(1H-benzo[d]imidazole-2-yl)-3-butylguanidine) ligand **7** (51 mg, 0.22 mmol) and 10 equivalents of potassium carbonate (120 mg, 0.88 mmol) were added to 20 mL of dry toluene and refluxed under nitrogen atmosphere for 20 hours. After the reaction was completed, it was cooled to room temperature and solvent was removed under reduced pressure. The solid was re-dissolved in dichloromethane and extracted with water, organic phases were combined, and solvent was removed under reduced pressure (Figure 6). The sample was dried and subjected to purification via column chromatography (neutral alumina as stationary phase, DCM: MeOH 10:0.5 as mobile phase). Fractions were collected ( $R_f = 0.28$ , DCM: MeOH, 10:0.5), and solvent was removed under reduced pressure. The product was dried in vacuo (Schlenk line) for 48 h. The final product **4** was obtained in (41.4 mg, 54%) yield as a red powder.

$^1\text{H}$  NMR (400 MHz,  $\text{CDCl}_3$ , 298 K)  $\delta$ : 8.38 (d,  $J = 8.5$  Hz, 1H), 7.97 (d,  $J = 8.2$  Hz, 1H), 7.90 (d,  $J = 8.6$  Hz, 1H), 7.78 (dd,  $J = 8.2, 1.2$  Hz, 1H), 7.64 (s, 1H), 7.55 (s, 1H), 7.47 (d,  $J = 4.7$  Hz, 1H), 7.40 (t,  $J = 7.6$  Hz, 1H), 7.22 (dd,  $J = 9.6, 4.4$  Hz, 2H), 7.08 (d,  $J = 4.8$  Hz, 1H), 7.02 (d,  $J = 4.7$  Hz, 1H), 7.00 (s, 1H), 6.95 (dd,  $J = 15.0, 7.2$  Hz, 1H), 6.82 – 6.75 (m, 1H), 6.49 (t,  $J = 7.8$  Hz, 1H), 6.36 (s, 1H), 6.07 (d,  $J = 4.8$  Hz, 1H), 5.81 (d,  $J = 8.3$  Hz, 1H), 4.21 (br s, 2H), 2.87 (s, 3H), 2.82 (s, 3H), 1.25 (br s, 1H), 1.23 – 1.16 (m, 2H), 1.07-1.02 (m,  $J = 14.9, 7.4$  Hz, 2H), 0.72 (t,  $J = 7.3$  Hz, 3H).  $^{13}\text{C}$  NMR (101 MHz,  $\text{CDCl}_3$ , 298 K)  $\delta$ : 165.97, 160.42, 155.06, 153.11, 149.93, 149.59, 147.78, 147.12, 146.90, 144.62,

140.39, 140.18, 139.11, 134.71, 132.07, 131.58, 131.04, 130.38, 130.09, 128.66, 127.39, 126.74, 126.51, 125.64, 125.44, 125.09, 124.70, 124.37, 122.56, 122.26, 118.88, 118.02, 115.58, 111.00, 40.85, 30.55, 19.96, 19.25, 19.02, 13.63. HRMS  $m/z$  calculated: 872.2176. Found: 872.2202 [M+].

### **Pyrimido[4,5-c]isoquinolin-3-amine – Compound 5**

5-iodopyrimidine-2,4-diamine (197 mg, 0.834 mmol), 2-formylphenylboronic acid (182 mg, 1.2 mmol), potassium carbonate (461 mg, 3.3 mmol) and tetrakis(triphenylphosphine)palladium(0) (1.40 mg, 0.5 mol%) were added to a mixture of dioxane and water (3:1, 9 mL of dioxane, 3 mL of water). The reaction mixture was heated under reflux for 3 h, then cooled to room temperature and placed in a cold bath. The precipitate was filtered and washed with water (2 x 30 mL), three times suspended and sonicated in water and filtered, then finally dried in a vacuum oven (24 h, 40 °C).

Product **5** (82 mg) was obtained as a fine bright yellow powder in (81.8 mg, 50%) yield.

$^1\text{H}$  NMR (400 MHz, 298K, DMSO- $d_6$ ):  $\delta$  9.88 (s, 1H), 9.50 (s, 1H), 8.72 (d, 1H,  $J$  = 8.1 Hz), 8.17 (d, 1H,  $J$  = 7.5 Hz), 7.92 (ddd, 1H,  $J$  = 8.4, 7.3, 1.3 Hz), 7.70 – 7.63 (m, 1H), 7.18 (s, 2H).  $^{13}\text{C}$  NMR (100 MHz, 298 K, DMSO- $d_6$ ):  $\delta$  163.68, 161.43, 158.80, 158.50, 132.58, 132.22, 129.33, 126.43, 124.43, 124.41, 120.35, 107.00. EI-MS  $m/z$  calcd.: 196.07 found: 197.08 [M+]. M.p. > 280°C. Anal. calcd. for  $\text{C}_{11}\text{H}_8\text{N}_4$ : C, 67.34; H, 4.11; N, 28.55. Found: C, 67.19; H, 4.25; N, 28.35.

### **1-(1H-Benzo[d]imidazole-2-yl)-3-butylthiourea – Compound 6**

A previously reported procedure was employed for the synthesis of **6**.<sup>2</sup> N-(benzoimidazol-2-yl)imidazole-1-carbothioamide (0.50 g, 2.1 mmol) and catalytic DMAP (25 mg, 0.2

mmol, 0.1 eq) were dissolved in 2 mL of DMF. Next, n-butyl amine (0.22 mL, 2.2 mmol) was slowly added dropwise while stirring. The reaction mixture was stirred at 100°C under N<sub>2</sub> for 18 hours. After cooling down to room temperature, the reaction mixture was poured over ice and stirred for 1 hour. A white-milky color precipitate was filtered and was washed with water (2 x 15 mL) and further purified by column chromatography (EtOAc / hexane, 3:2, R<sub>f</sub> = 0.2). Fractions were collected and the solvent removed by rotary evaporation. The product **6** was dried in a vacuum oven at 40 °C overnight. Pale yellow title compound **6** was obtained in (364.7 mg, 70%) yield.

<sup>1</sup>H NMR (400 MHz, 298 K, DMSO-*d*<sub>6</sub>): δ 11.26 (br s, 1H), 11.15 (br s, 1H), 10.97 (br s, 1H), 7.44 (s, 2H), 7.19 – 7.04 (m, 2H), 3.64 (d, 2H, *J* = 5.8 Hz), 1.69 – 1.53 (m, 2H), 1.46 – 1.32 (m, 2H), 0.94 (t, 3H, *J* = 7.3 Hz). <sup>13</sup>C NMR (100 MHz, 298 K, DMSO-*d*<sub>6</sub>): δ 177.82, 148.19, 140.39, 131.32, 121.78, 116.91, 111.45, 44.36, 39.52, 30.59, 19.94, 13.92. M.p. 147-150°C. EI-MS *m/z* calcd.: 247.10 found: 248.11 [M+]. Anal. calcd. for C<sub>12</sub>H<sub>16</sub>N<sub>4</sub>S: C, 58.04; H, 6.49; N, 22.56. Found: C, 57.93; H, 6.54; N, 22.40.

### **1-(1H-benzo[d]imidazole-2-yl)-3-butylguanidine – Compound 7**

From a modified procedure,<sup>2</sup> compound **6** (0.27 g, 1.08 mmol) was suspended in 15 mL of CHCl<sub>3</sub> and to this were added HgO (0.32 g, 1.51 mmol) and 2 M methanolic NH<sub>3</sub> (6 mL). The reaction mixture was stirred at room temperature for 3 h and a color change from wine red to brown was observed. The reaction was then filtered through celite and concentrated under reduced pressure. The resulting solid was dissolved in 2 M acetic acid (~ 8 mL) and stirred for 1 h, then filtered through celite. The pH was adjusted to 8.0 by addition of a 10 M solution of NaOH. The formed precipitate was filtered, washed with water and dried. The product was dissolved in chloroform and extracted 3 x with saturated



solution of NaHCO<sub>3</sub>. The organic phase was separated and dried over MgSO<sub>4</sub> and the solvent removed under reduced pressure. The final product was dried overnight in a vacuum oven at 40°C. Compound **7** was obtained as white powder in (31.2 mg, 50%) yield.

<sup>1</sup>H NMR (400 MHz, 298 K, DMSO-*d*<sub>6</sub>): δ 11.00 (s, 1H), 7.20 (d, 1H, *J* = 7.3 Hz), 7.07 (d, 1H, *J* = 7.1 Hz), 6.98 – 6.78 (m, 2H), 3.21 (dd, 2H, *J* = 12.7, 6.9 Hz), 1.48 (dd, 2H, *J* = 14.8, 7.3 Hz), 1.36 (dt, 2H, *J* = 14.7, 7.2 Hz), 0.92 (t, 3H, *J* = 7.3 Hz). <sup>13</sup>C NMR (100 MHz, 298K, DMSO-*d*<sub>6</sub>): δ 159.05, 157.66, 142.59, 132.21, 119.65, 118.99, 114.94, 108.48, 40.07, 39.52, 31.49, 19.66, 13.80. M.p. 190-208°C. EI-MS *m/z* calculated: 231.15 found: 232.16 [M<sup>+</sup>]. Anal. calcd. for C<sub>12</sub>H<sub>17</sub>N<sub>5</sub>: C, 62.31; H, 7.41; N, 30.28. Found: C, 62.12; H, 7.55; N, 30.06.

### **2-Napthalen-2-yl pyridine – Compound 8**

Napthalen-2-yl-boronic acid (163 mg, 0.95 mmol), tetrakis(triphenylphosphine) palladium (0.5 mol%, 5.4 mg) and sodium carbonate (201 mg, 2 eq) were added together to mixture of ethanol and deionized water (1.3: 0.8 mL). 2-bromopyridine (0.1 mL, 0.95 mmol) was added dropwise (syringe) into the reaction tube (Vial Type G10). The tube was sealed and placed into a microwave reactor, and the reaction was monitored through the built-in camera. Reaction conditions were set for 150°C, 15 min and the cooling process was set to reach 55°C. After completion of the microwave process, the tube was placed in an ice-cold bath and stirred for 1 h to support the formation of precipitate (Figure 12). The precipitate was collected and washed multiple times with water and air dried (Figure 12). The product was further purified through flash column chromatography (silica, DCM, R<sub>f</sub> =

0.44). Fractions were combined and solvent removed under reduced pressure. Final product **8** was obtained as off-white powder in (130.6 mg, 67%) yield.

$^1\text{H}$  NMR (400 MHz,  $\text{CDCl}_3$ , 298 K)  $\delta$ : 8.76 (d,  $J = 4.7$  Hz, 1H), 8.50 (s, 1H), 8.15 (dd,  $J = 8.6, 1.7$  Hz, 1H), 7.96 (d,  $J = 8.4$  Hz, 2H), 7.87 (d,  $J = 8.0$  Hz, 2H), 7.78 (td,  $J = 7.8, 1.7$  Hz, 1H), 7.52 (dd,  $J = 6.1, 3.4$  Hz, 2H), 7.26 (t,  $J = 6.1$  Hz, 1H).  $^{13}\text{C}$  NMR (101 MHz,  $\text{CDCl}_3$ , 298 K)  $\delta$ : 157.43, 149.88, 136.92, 136.78, 133.76, 133.63, 128.83, 128.56, 127.78, 126.63, 126.44, 126.41, 124.67, 122.26, 120.93, 77.16.

#### **4-methyl-2-thiophen-2-yl-quinoline – Compound 9**

Thiophen-2-yl-boronic acid (0.73 g, 5.3 mmol), 2-chloro-4-methylquinoline (0.85 g, 4.7 mmol) and  $\text{Pd}(\text{PPh}_3)_4$  (3 mol%) was added to 20 mL of THF and 2M aqueous  $\text{Na}_2\text{CO}_3$  solution (9 mL). Nitrogen was bubbled through the reaction mixture before the reflux started. After 24h, the reaction mixture was cooled to room temperature (the colour of the solution was very dark- almost black). The mixture was filtered through celite before extraction with water/EtOAc. The organic phases were combined and dried over magnesium sulfate and solvent was removed under reduced pressure. TLC control of the crude mixture revealed only one spot but from the  $^1\text{H}$  NMR minor impurities were present. The crude mixture was subjected to column chromatography (silica, DCM) and fractions were collected. Fractions containing the desired product ( $R_f = 0.78$ , DCM) were combined and solvent was removed under reduced pressure. The final product **9** was obtained in (741.3 mg, 70%) yield as a clear oil with a little hint of yellow. Characterization data matched those reported in literature.

$^1\text{H}$  NMR (400 MHz,  $\text{CDCl}_3$ , 298 K)  $\delta$ : 8.09 (d,  $J = 9.0$  Hz, 1H), 7.95 (dd,  $J = 8.3, 1.0$  Hz, 1H), 7.73 (dd,  $J = 3.7, 1.1$  Hz, 1H), 7.68 (ddd,  $J = 8.4, 6.9, 1.4$  Hz, 1H), 7.65 (d,  $J = 0.8$

Hz, 1H), 7.50 (ddd,  $J = 8.2, 6.9, 1.3$  Hz, 1H), 7.45 (dd,  $J = 5.0, 1.1$  Hz, 1H), 7.16 (dd,  $J = 5.0, 3.7$  Hz, 1H), 2.74 (s, 3H).  $^{13}\text{C}$  NMR (101 MHz,  $\text{CDCl}_3$ , 298 K)  $\delta$ : 152.16, 148.11, 144.83, 129.98, 129.61, 128.47, 128.15, 127.48, 126.00, 125.78, 123.76, 118.44, 19.08.

### **Benzo-thiophen-2-yl-4-methylquinoline – Compound 10**

To one equivalent of 2-chloro-4-methylquinoline (1.28 g, 7.25 mmol) with 1.2 equivalents of benzo[b]thiophene-2-boronic acid in 30 mL of dry THF, 6 mol% of  $\text{Pd}(\text{PPh}_3)_4$  was added. A 5% solution of  $\text{Na}_2\text{CO}_3$  (~ 10 mL) was added to the mixture and nitrogen was bubbled through (15 min) prior to the reaction start. The reaction was refluxed for one day (25 h), under nitrogen atmosphere. After being cooled down, the mixture was poured into water and the organic part was extracted with ethyl acetate. The organic layers were combined, dried over magnesium sulphate, and solvent was removed under reduced pressure. The crude mixture was dark red/brown with an oily texture. The product was further purified with column chromatography ( $R_f = 0.6$ , EtOAc: hexane, 2:8) and solvent removed under reduced pressure. The product was then recrystallised from diethyl ether. The final product **10** was obtained in (1.5 g, 74%) yield as off-white crystals.

$^1\text{H}$  NMR (400 MHz,  $\text{CDCl}_3$ , 298 K)  $\delta$ : 8.80 (d,  $J = 8.1$  Hz, 1H), 8.23 (d,  $J = 8.4$  Hz, 1H), 8.02 (d,  $J = 8.7$  Hz, 1H), 7.93 (d,  $J = 5.9$  Hz, 2H), 7.75 (t,  $J = 7.6$  Hz, 1H), 7.67 (s, 1H), 7.58 (t,  $J = 7.6$  Hz, 1H), 7.50 (t,  $J = 7.6$  Hz, 1H), 7.43 (t,  $J = 7.5$  Hz, 1H), 2.78 (s, 3H).  $^{13}\text{C}$  NMR (101 MHz,  $\text{CDCl}_3$ , 298 K)  $\delta$ : 154.38, 148.10, 144.79, 141.03, 137.70, 136.94, 130.30, 129.53, 127.39, 127.27, 126.27, 125.04, 124.90, 124.84, 123.78, 122.73, 121.64, 77.48, 77.16, 77.16, 76.84, 19.06. HRMS  $m/z$  calculated: 276.0841. Found: 276.0840 [M+]. Anal. Calcd for  $\text{C}_{18}\text{H}_{13}\text{NS}$ : C, 78.51; H, 4.76; N, 5.09. Found: C, 78.28; H, 4.63; N, 5.08.

### S3. <sup>1</sup>H and <sup>13</sup>C NMR Spectra, Mass Spectra, Elemental Analysis and Crystallographic Data

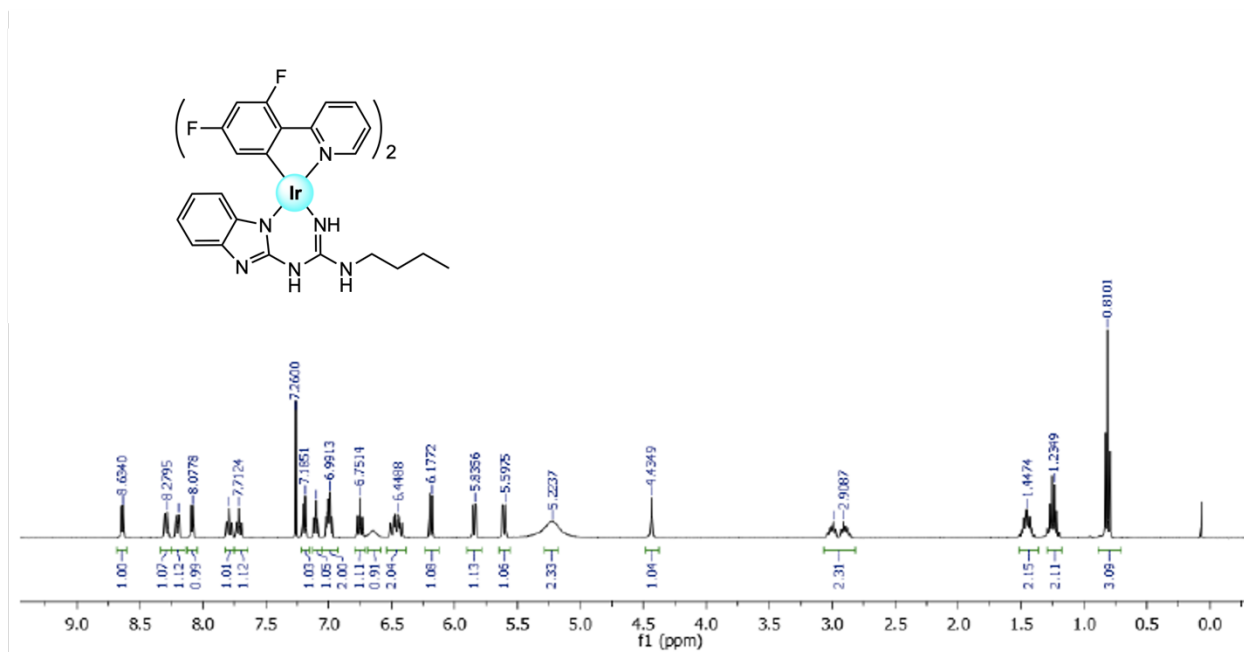

Figure S1. <sup>1</sup>H NMR spectrum of blue iridium complex 1, CDCl<sub>3</sub>, 400 MHz, 298 K.

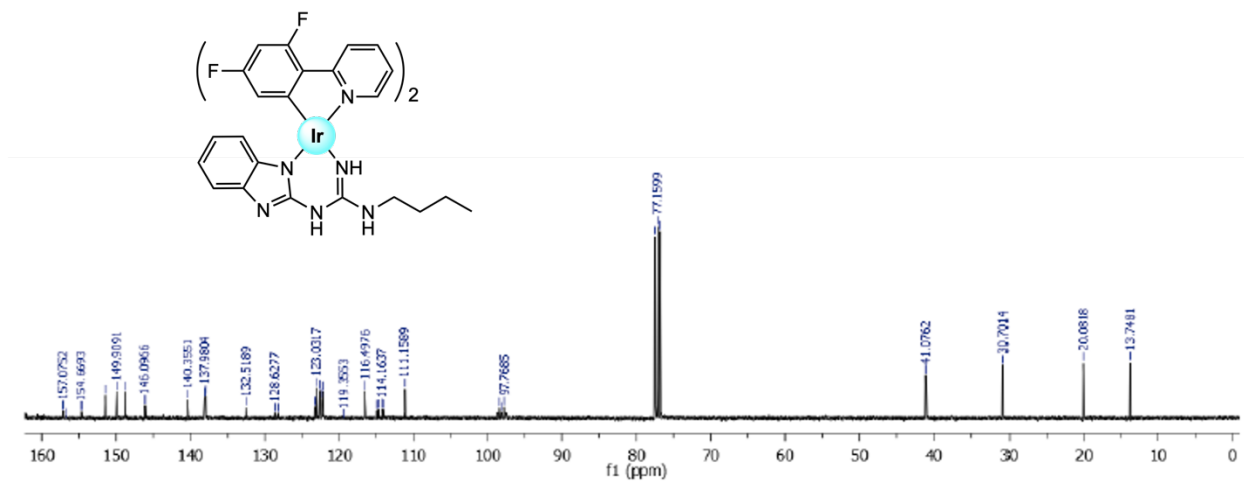

Figure S2. <sup>13</sup>C NMR spectrum of blue iridium complex 1, CDCl<sub>3</sub>, 101 MHz, 298 K.

## Mass Spectrum SmartFormula Report

|                      |                                    |                         |                     |               |
|----------------------|------------------------------------|-------------------------|---------------------|---------------|
| <b>Analysis Info</b> |                                    | <b>Acquisition Date</b> | 7/8/2019 2:52:51 PM |               |
| Analysis Name        | D:\Data\Xiao\July 08 2019\000002.d | Operator                | x                   |               |
| Method               | Xiao_pos_Standard.m                | Instrument              | compact             | 8255754.20059 |
| Sample Name          | 427                                |                         |                     |               |
| Comment              |                                    |                         |                     |               |

|                              |            |                      |          |                  |           |
|------------------------------|------------|----------------------|----------|------------------|-----------|
| <b>Acquisition Parameter</b> |            |                      |          |                  |           |
| Source Type                  | ESI        | Ion Polarity         | Positive | Set Nebulizer    | 0.3 Bar   |
| Focus                        | Not active | Set Capillary        | 3500 V   | Set Dry Heater   | 180 °C    |
| Scan Begin                   | 50 m/z     | Set End Plate Offset | -500 V   | Set Dry Gas      | 4.0 l/min |
| Scan End                     | 1500 m/z   | Set Charging Voltage | 2000 V   | Set Divert Valve | Source    |
|                              |            | Set Corona           | 0 nA     | Set APCI Heater  | 0 °C      |

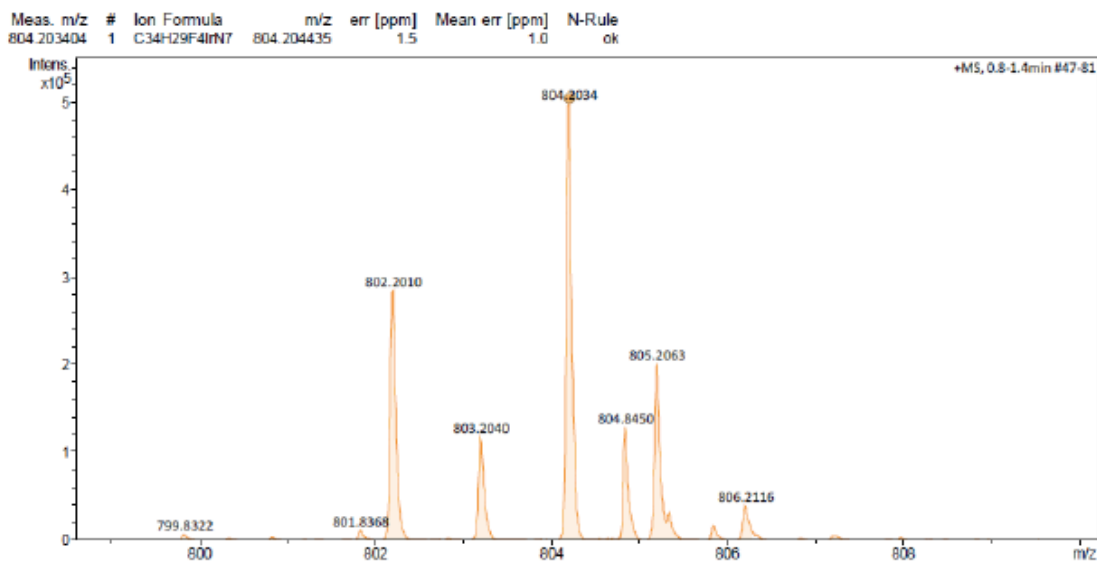

**Figure S3.** Mass spectrum of iridium complex **1**. HMRS [ESI+] ion [C<sub>34</sub>H<sub>29</sub>F<sub>4</sub>IrN<sub>7</sub>]<sup>+</sup> m/z calculated: 804.2044 Found: 804.2034 [M<sup>+</sup>].

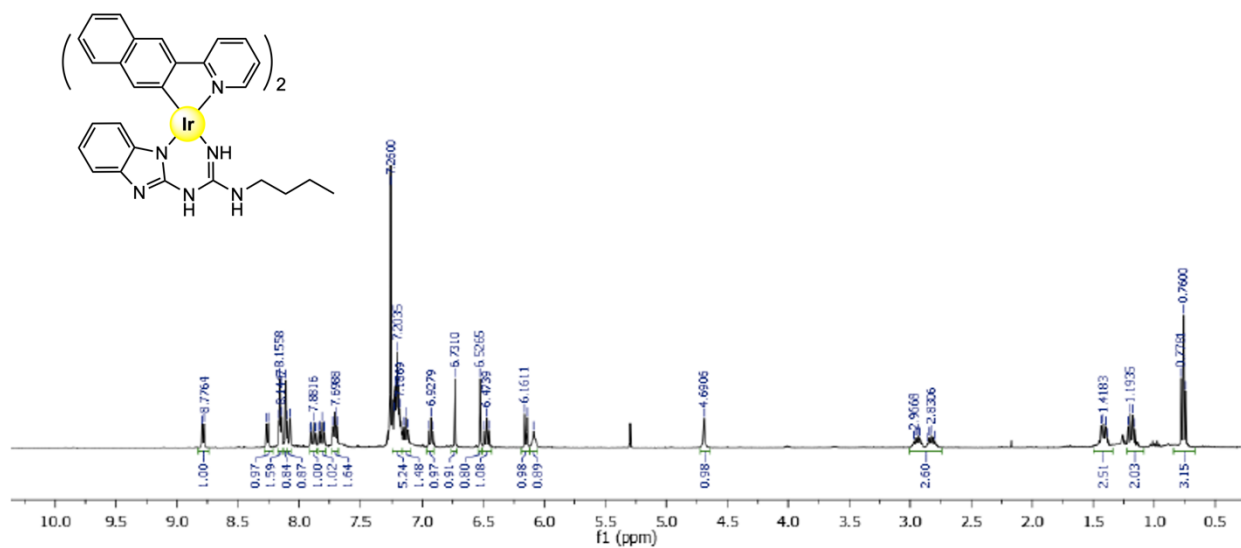

**Figure S4.**  $^1\text{H}$  NMR spectrum of yellow iridium complex **2**,  $\text{CDCl}_3$ , 400 MHz, 298 K.

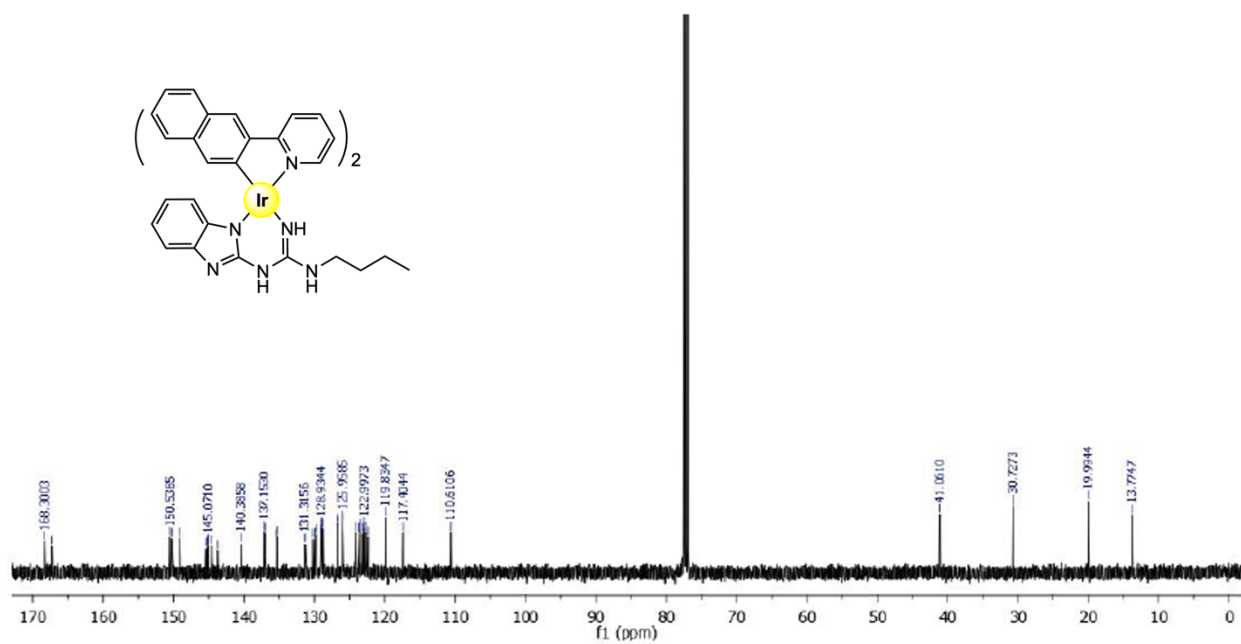

**Figure S5.**  $^{13}\text{C}$  NMR spectrum of yellow iridium complex **2**,  $\text{CDCl}_3$ , 101 MHz, 298 K.

## Mass Spectrum SmartFormula Report

|                              |                                    |                      |          |                  |               |                     |  |
|------------------------------|------------------------------------|----------------------|----------|------------------|---------------|---------------------|--|
| <b>Analysis Info</b>         |                                    |                      |          | Acquisition Date |               | 7/8/2019 2:39:08 PM |  |
| Analysis Name                | D:\Data\Xiao\July 08 2019\000001.d |                      |          | Operator         | x             |                     |  |
| Method                       | Xiao_pos_Standard.m                |                      |          | Instrument       | compact       |                     |  |
| Sample Name                  | SH 95                              |                      |          |                  | 8255754.20059 |                     |  |
| Comment                      |                                    |                      |          |                  |               |                     |  |
| <b>Acquisition Parameter</b> |                                    |                      |          |                  |               |                     |  |
| Source Type                  | ESI                                | Ion Polarity         | Positive | Set Nebulizer    | 0.3 Bar       |                     |  |
| Focus                        | Not active                         | Set Capillary        | 3500 V   | Set Dry Heater   | 180 °C        |                     |  |
| Scan Begin                   | 50 m/z                             | Set End Plate Offset | -500 V   | Set Dry Gas      | 4.0 l/min     |                     |  |
| Scan End                     | 1500 m/z                           | Set Charging Voltage | 2000 V   | Set Divert Valve | Source        |                     |  |
|                              |                                    | Set Corona           | 0 nA     | Set APCI Heater  | 0 °C          |                     |  |

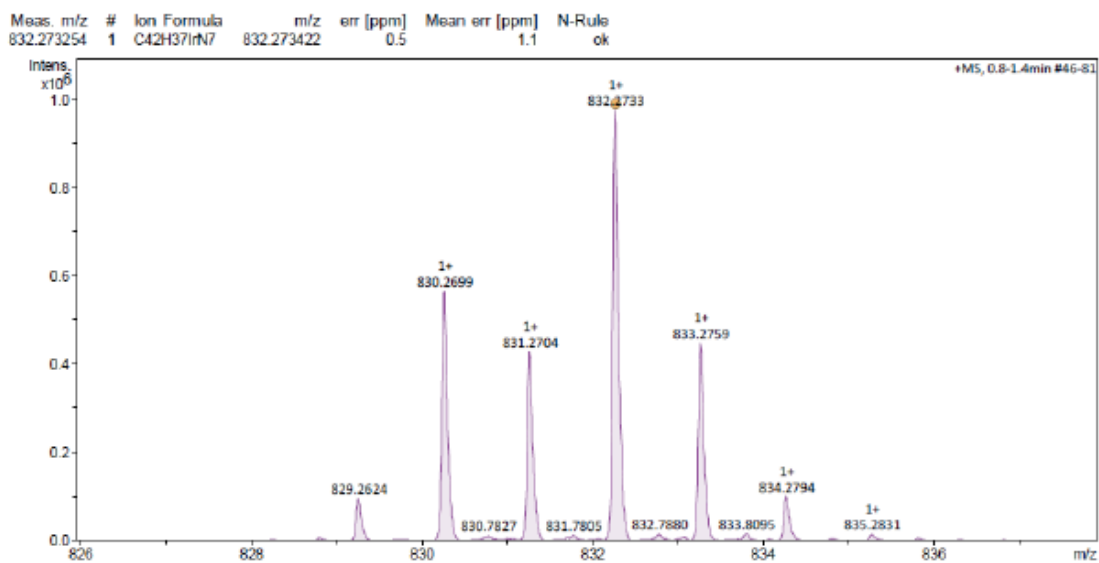

**Figure S6.** Mass spectrum of iridium complex **2**. HMRS [ESI+] ion  $[C_{42}H_{37}IrN_7]^+$  m/z calculated: 804.2732 Found: 832.1733 [M+].

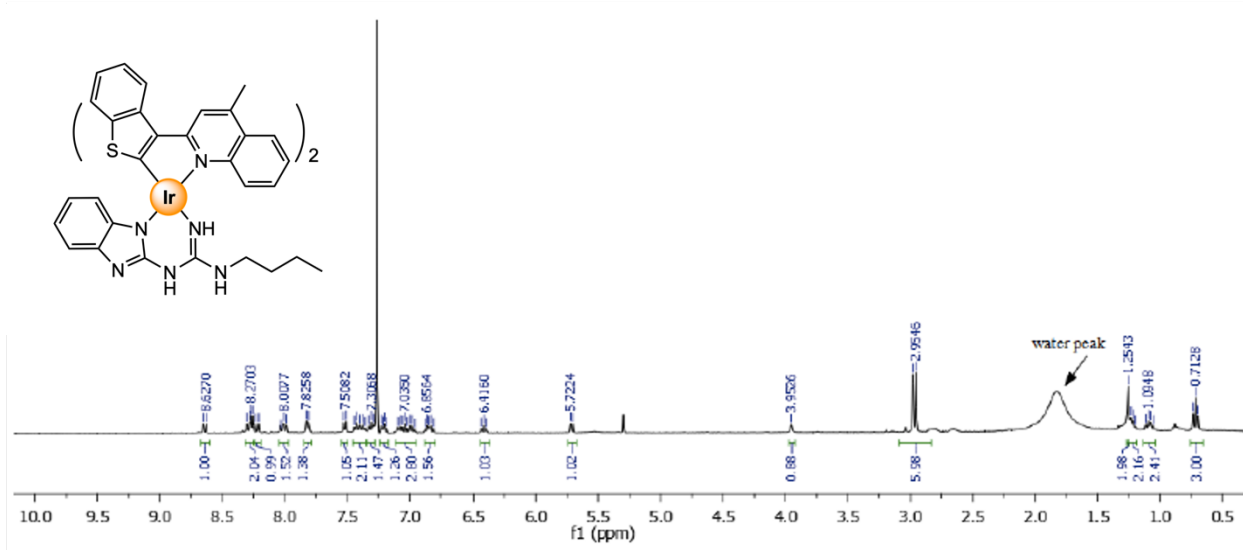

**Figure S7.** <sup>1</sup>H NMR spectrum of orange iridium complex **3**, CDCl<sub>3</sub>, 400 MHz, 298 K.

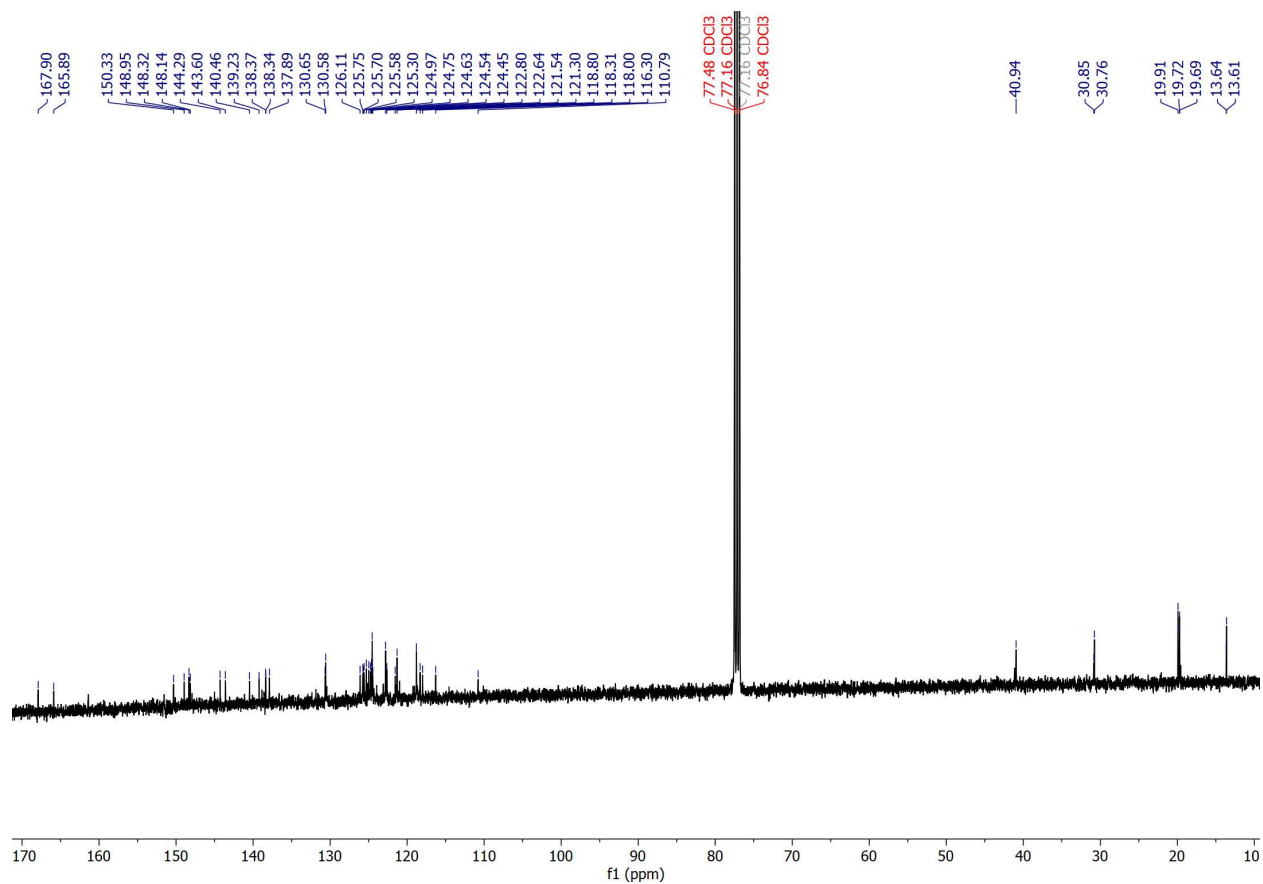

**Figure S8.**  $^{13}\text{C}$  NMR spectrum of orange iridium complex **3**,  $\text{CDCl}_3$ , 101 MHz, 298 K.



## Mass Spectrum SmartFormula Report

|               |                                   |                  |                      |               |
|---------------|-----------------------------------|------------------|----------------------|---------------|
| Analysis Info |                                   | Acquisition Date | 8/21/2019 9:35:57 AM |               |
| Analysis Name | D:\Data\Xiao\Aug 21 2019\000001.d | Operator         | x                    |               |
| Method        | Xiao_pos_Standard.m               | Instrument       | compact              | 8255754.20059 |
| Sample Name   | 361                               |                  |                      |               |
| Comment       |                                   |                  |                      |               |

|                       |            |                      |          |                  |           |
|-----------------------|------------|----------------------|----------|------------------|-----------|
| Acquisition Parameter |            |                      |          |                  |           |
| Source Type           | ESI        | Ion Polarity         | Positive | Set Nebulizer    | 0.3 Bar   |
| Focus                 | Not active | Set Capillary        | 3500 V   | Set Dry Heater   | 180 °C    |
| Scan Begin            | 50 m/z     | Set End Plate Offset | -500 V   | Set Dry Gas      | 4.0 l/min |
| Scan End              | 1500 m/z   | Set Charging Voltage | 2000 V   | Set Divert Valve | Source    |
|                       |            | Set Corona           | 0 nA     | Set APCI Heater  | 0 °C      |

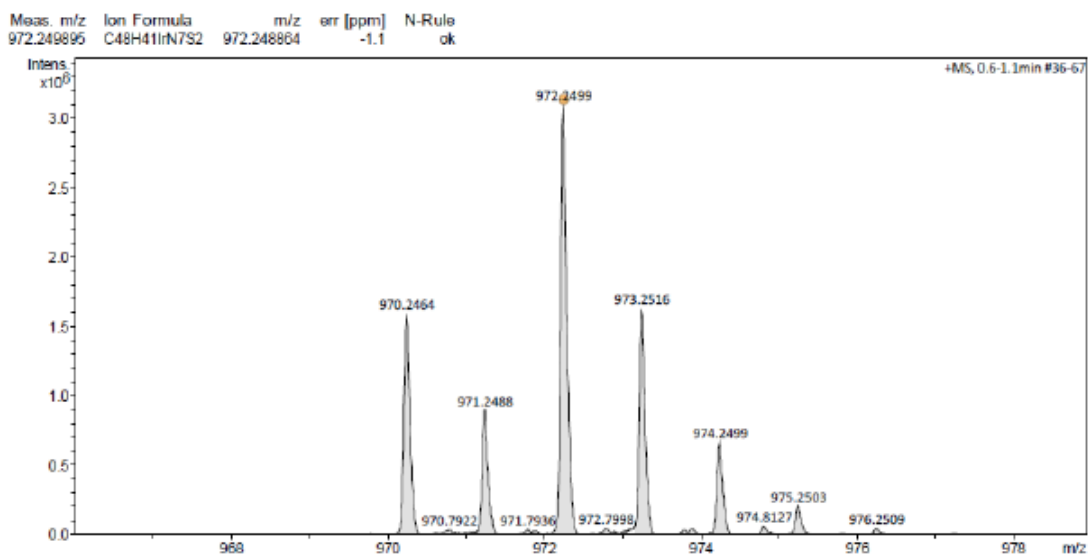

**Figure S9.** Mass spectrum of iridium complex **3**. HMRS [ESI+] ion [C<sub>48</sub>H<sub>41</sub>IrN<sub>7</sub>S<sub>2</sub>]<sup>+</sup> m/z calculated: 972.2488. Found: 972.2498 [M<sup>+</sup>].

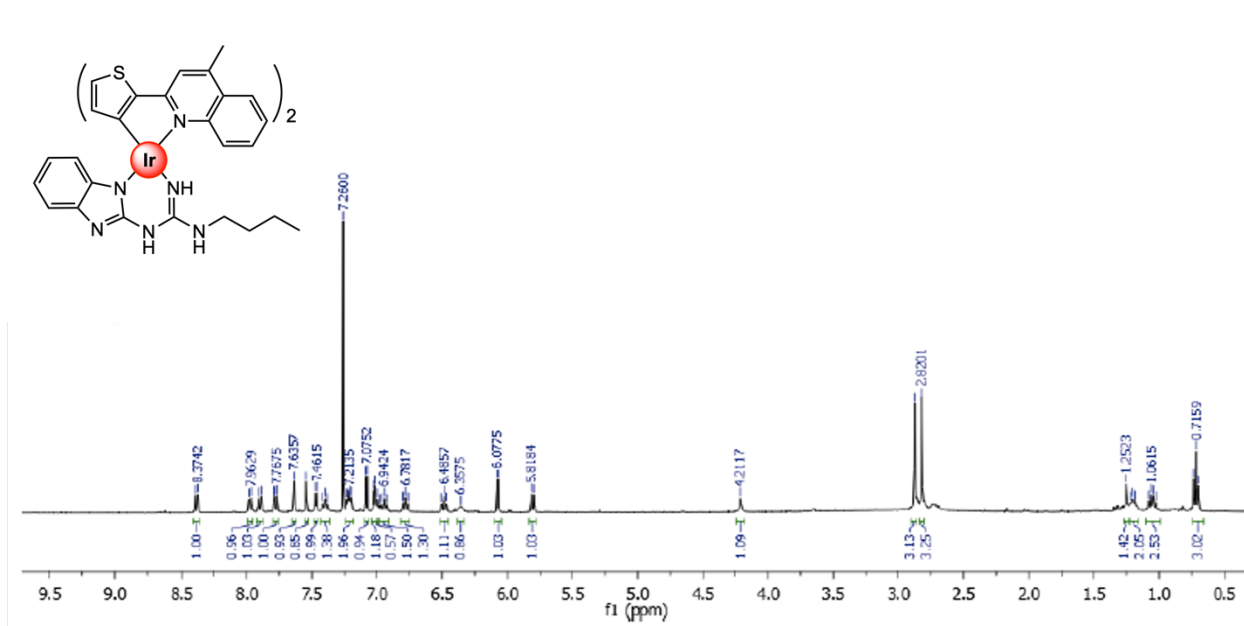

**Figure S10.**  $^1\text{H}$  NMR spectrum of red iridium complex **4**, CDCl<sub>3</sub>, 400 MHz, 298 K.

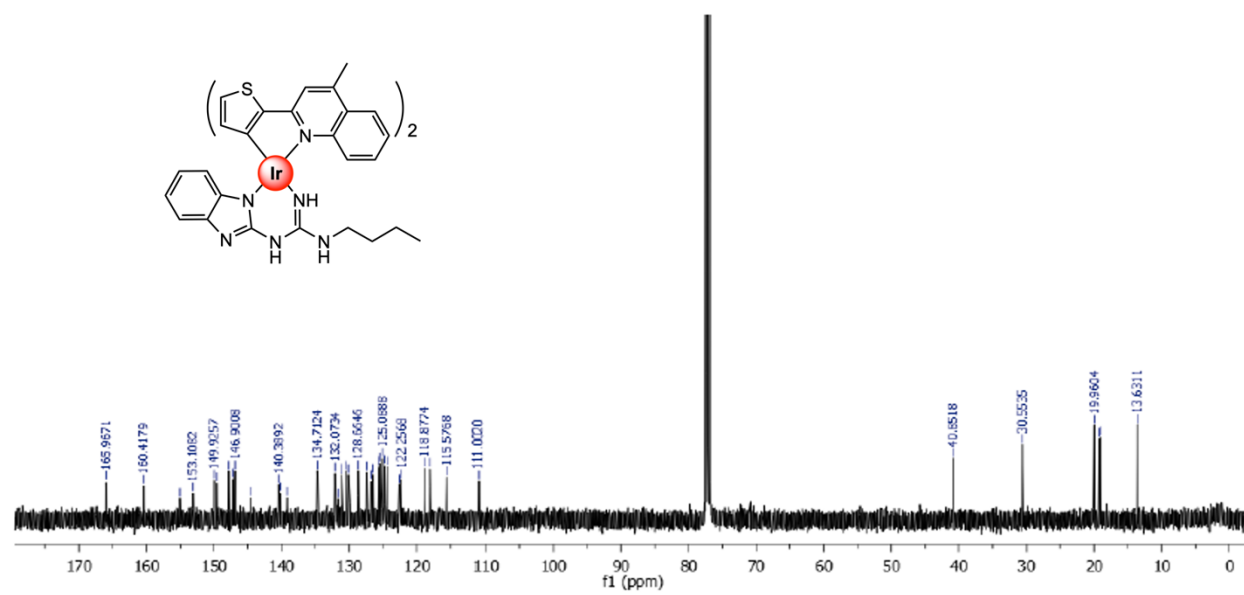

**Figure S11.**  $^{13}\text{C}$  NMR spectrum of red iridium complex **6**, CDCl<sub>3</sub>, 101 MHz, 298 K.

| Analysis Info                                                                 |                                    |                |           | Acquisition Date     |               |        |                |
|-------------------------------------------------------------------------------|------------------------------------|----------------|-----------|----------------------|---------------|--------|----------------|
| Analysis Name                                                                 | D:\Data\Xiao\Sept 12 2019\000001.d |                |           | 9/12/2019 8:47:48 AM |               |        |                |
| Method                                                                        | Xiao 2.m                           |                |           | Operator             | Administrator |        |                |
| Sample Name                                                                   | 460                                |                |           | Instrument           | micrOTOF 57   |        |                |
| Comment                                                                       |                                    |                |           |                      |               |        |                |
| Acquisition Parameter                                                         |                                    |                |           |                      |               |        |                |
| Source Type                                                                   | ESI                                | Ion Polarity   | Positive  | Set Corrector Fill   | 45 V          |        |                |
| Scan Range                                                                    | n/a                                | Capillary Exit | 90.0 V    | Set Pulsar Pull      | 399 V         |        |                |
| Scan Begin                                                                    | 50 m/z                             | Hexapole RF    | 125.0 V   | Set Pulsar Push      | 399 V         |        |                |
| Scan End                                                                      | 1500 m/z                           | Skimmer 1      | 40.0 V    | Set Reflector        | 1300 V        |        |                |
|                                                                               |                                    | Hexapole 1     | 23.0 V    | Set Flight Tube      | 9000 V        |        |                |
|                                                                               |                                    |                |           | Set Detector TOF     | 2200 V        |        |                |
| Sum Formula                                                                   | Sigma                              | m/z            | Err (ppm) | Mean Err (ppm)       | rdB           | N Rule | e <sup>-</sup> |
| C <sub>40</sub> H <sub>37</sub> Ir <sub>1</sub> N <sub>7</sub> S <sub>2</sub> | 0.09                               | 872.2176       | -3.04     | -1.97                | 26.50         | ok     | even           |

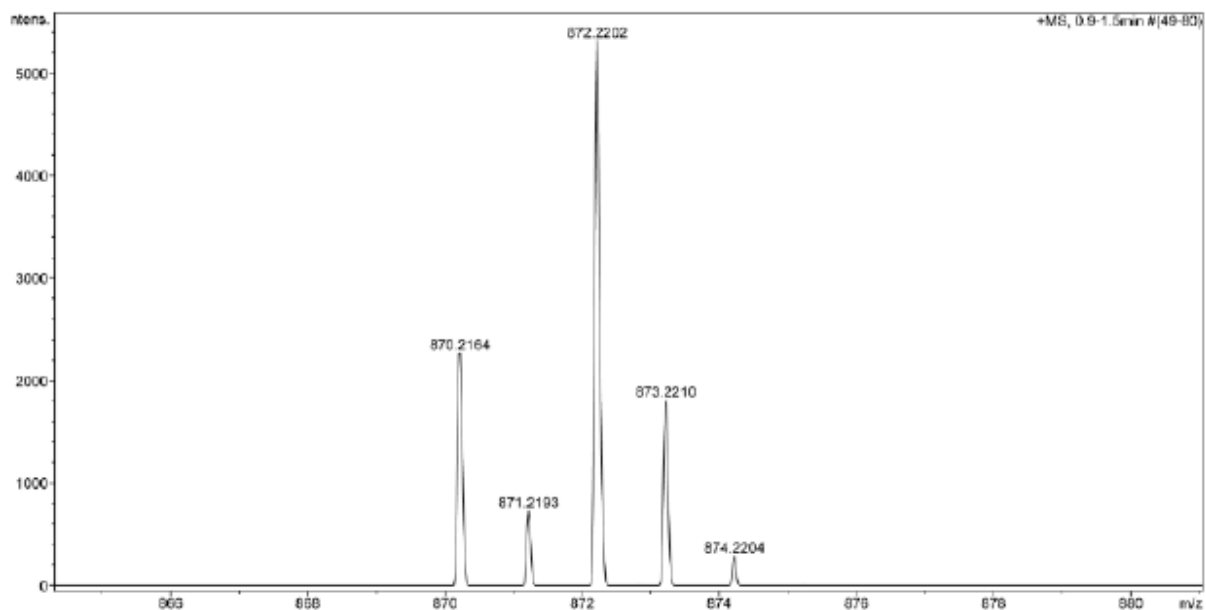

**Figure S12.** Mass spectrum of iridium complex **4**. HMRS [ESI+] ion  $[C_{48}H_{41}IrN_7S_2]^+$  m/z calculated: 872.2176. Found: 872.2202 [M+].

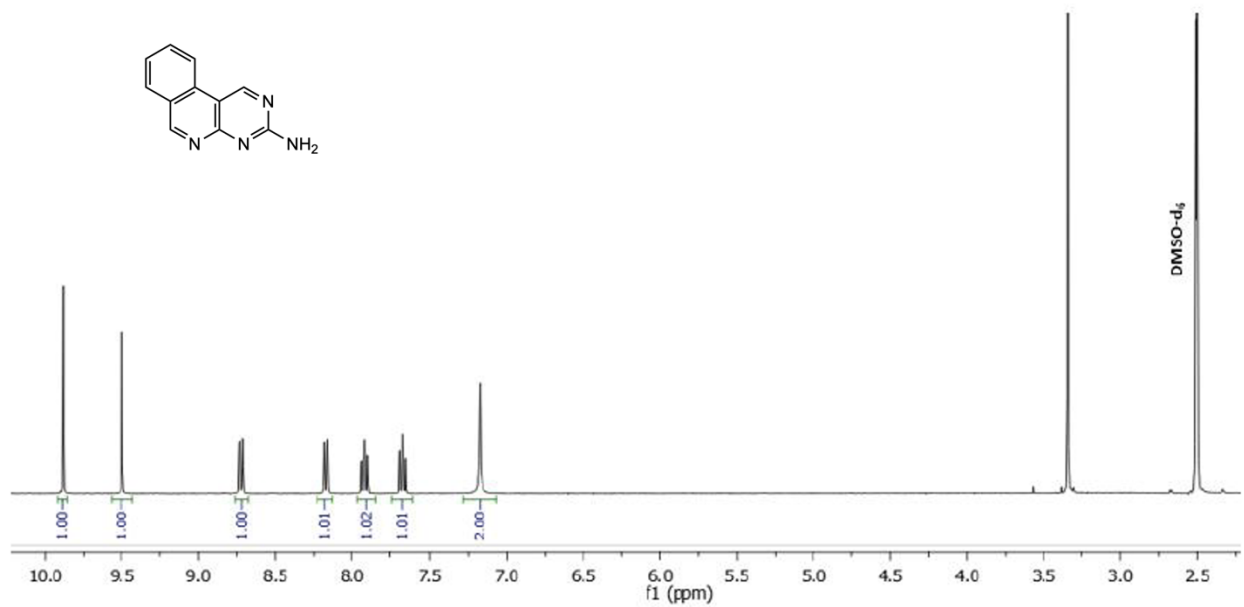

**Figure S13.** <sup>1</sup>H NMR spectrum of compound **5**, DMSO-d<sub>6</sub>, 400 MHz, 298 K.

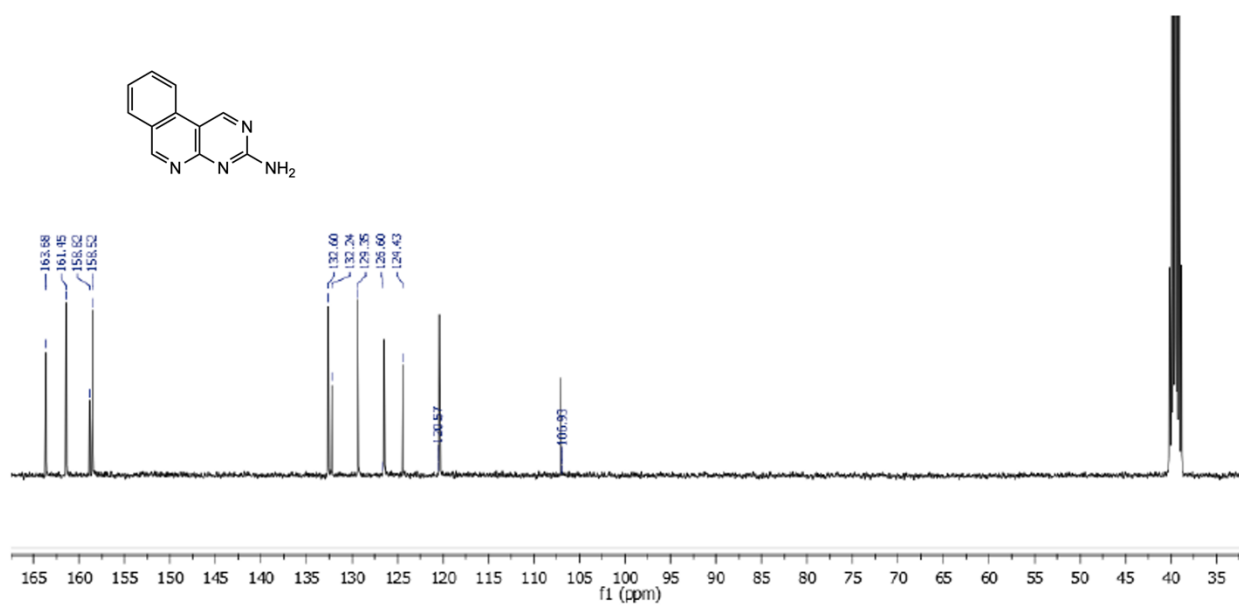

**Figure S14.** <sup>13</sup>C NMR spectrum of compound **5**, DMSO-d<sub>6</sub>, 101 MHz, 298 K.

## Display Report

| Analysis Info |                                             | Acquisition Date    |              |
|---------------|---------------------------------------------|---------------------|--------------|
| Analysis Name | D:\Data\BSF\2016_05\BB110516_05_5_01_5258.d | 11/05/2016 17:24:20 |              |
| Method        | directinfusion_small_pos.m                  | Operator            | Bruker       |
| Sample Name   | BB110516_05                                 | Instrument          | micrOTOF-Q   |
| Comment       | 2-98-filtr                                  |                     | 228888.10141 |

  

| Acquisition Parameter |            |                       |           |                  |           |
|-----------------------|------------|-----------------------|-----------|------------------|-----------|
| Source Type           | ESI        | Ion Polarity          | Positive  | Set Nebulizer    | 0.4 Bar   |
| Focus                 | Not active | Set Capillary         | 4500 V    | Set Dry Heater   | 180 °C    |
| Scan Begin            | 50 m/z     | Set End Plate Offset  | -500 V    | Set Dry Gas      | 4.0 l/min |
| Scan End              | 1250 m/z   | Set Collision Cell RF | 140.0 Vpp | Set Divert Valve | Source    |

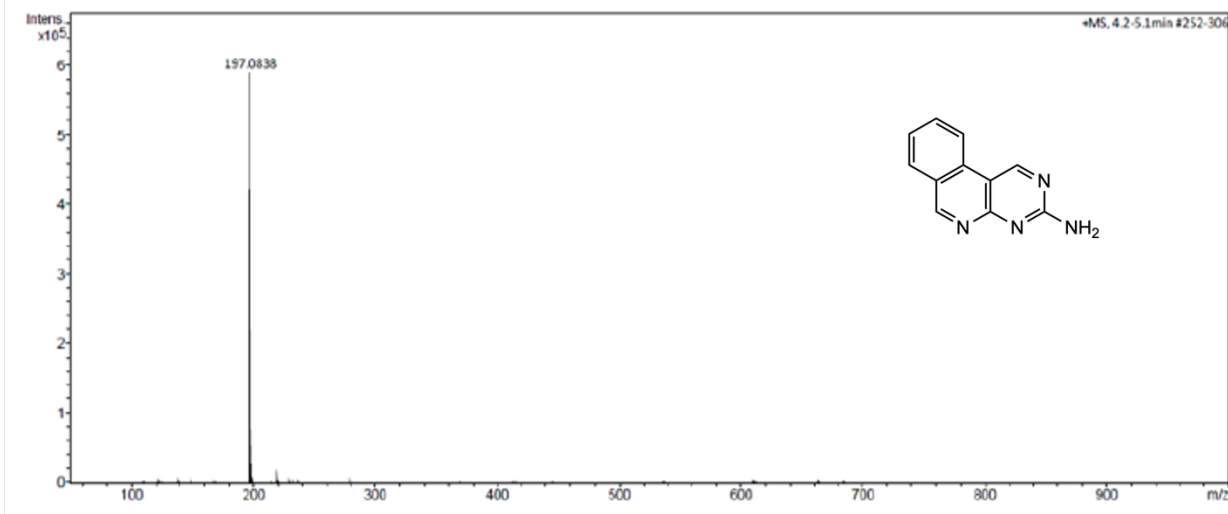

**Figure S15.** Mass spectrum for compound **5**. LMRS [ESI+] ion [C<sub>11</sub>H<sub>8</sub>N<sub>4</sub>]<sup>+</sup>

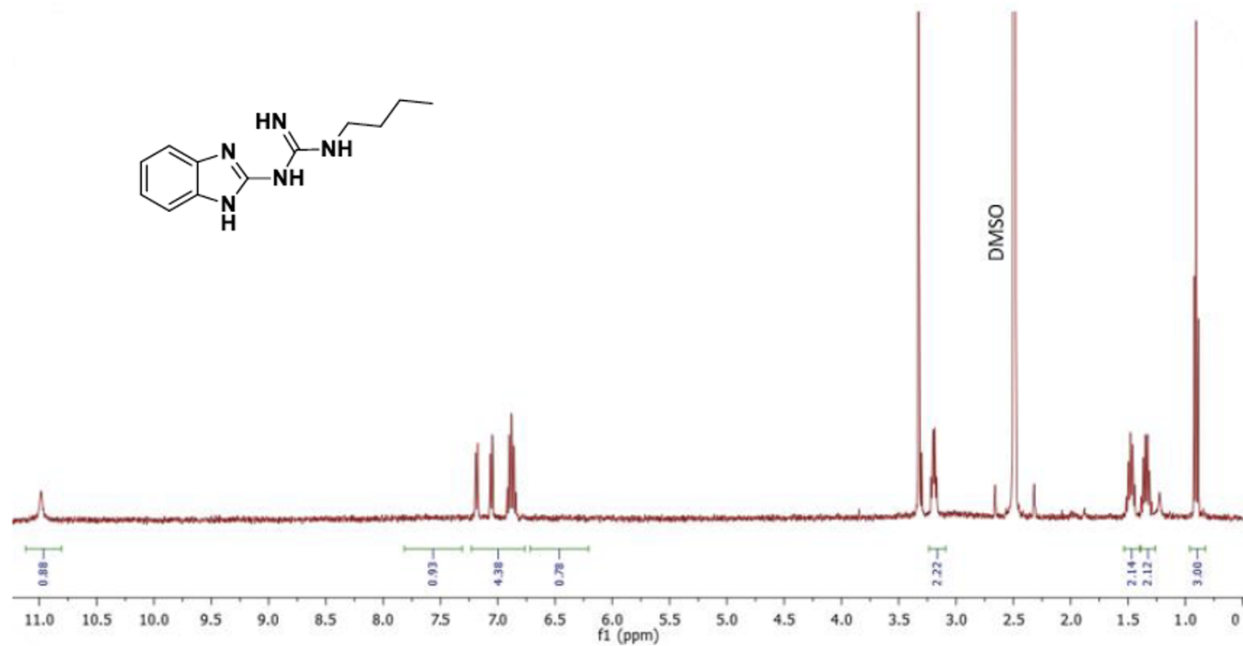

**Figure S16.** <sup>1</sup>H NMR spectrum of compound 7 DMSO-d<sub>6</sub>, 400 MHz, 298 K.

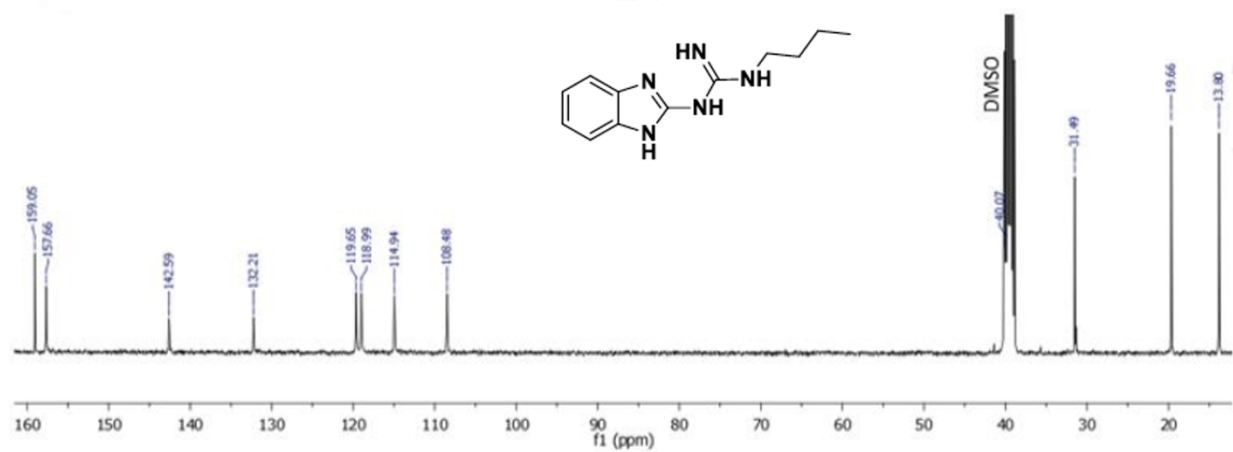

**Figure S17.** <sup>13</sup>C NMR spectrum of compound 7 DMSO-d<sub>6</sub>, 101 MHz, 298 K.

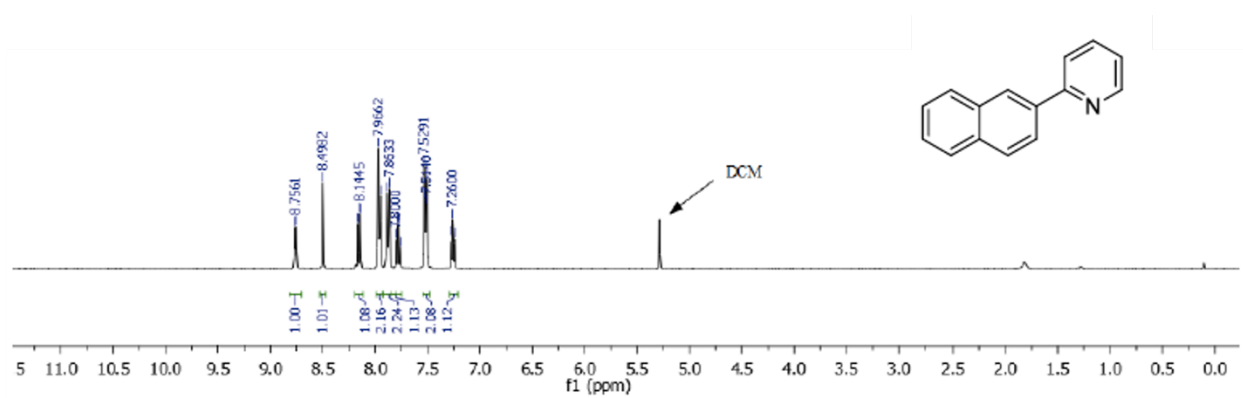

**Figure S18.**  $^1\text{H}$  NMR spectrum of compound **8**,  $\text{CDCl}_3$ , 400 MHz, 298 K.

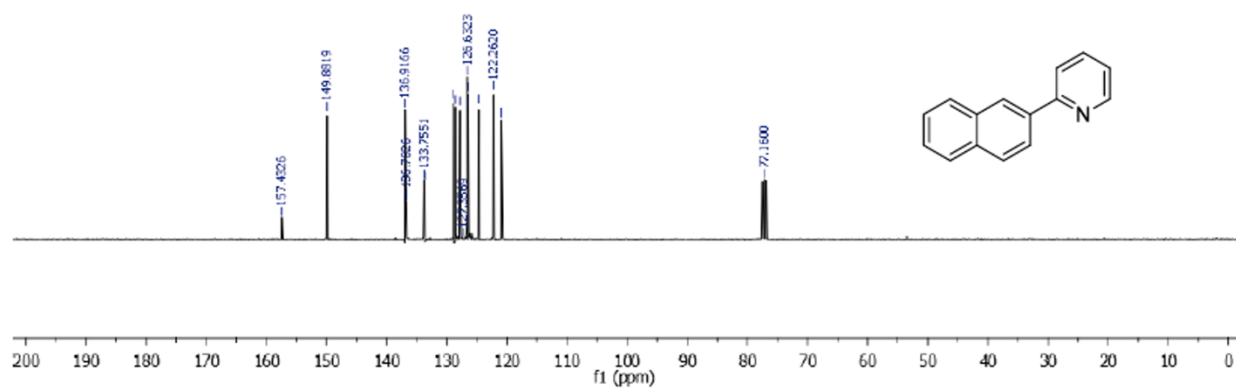

**Figure S19.**  $^{13}\text{C}$  NMR spectrum of compound **8**,  $\text{CDCl}_3$ , 101 MHz, 298 K.

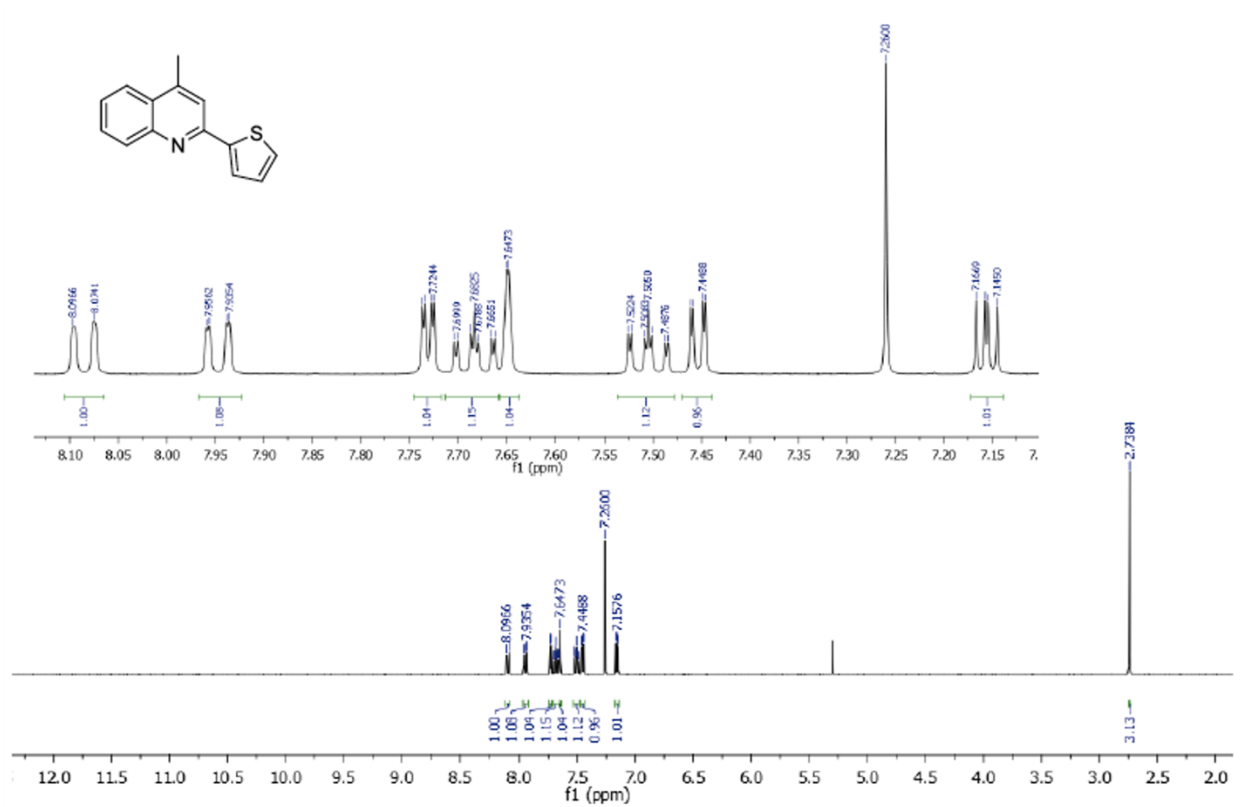

**Figure S20.** <sup>1</sup>H NMR spectrum of compound **9** with inset <sup>1</sup>H NMR spectrum expanded into aromatic region, CDCl<sub>3</sub>, 400 MHz, 298 K.

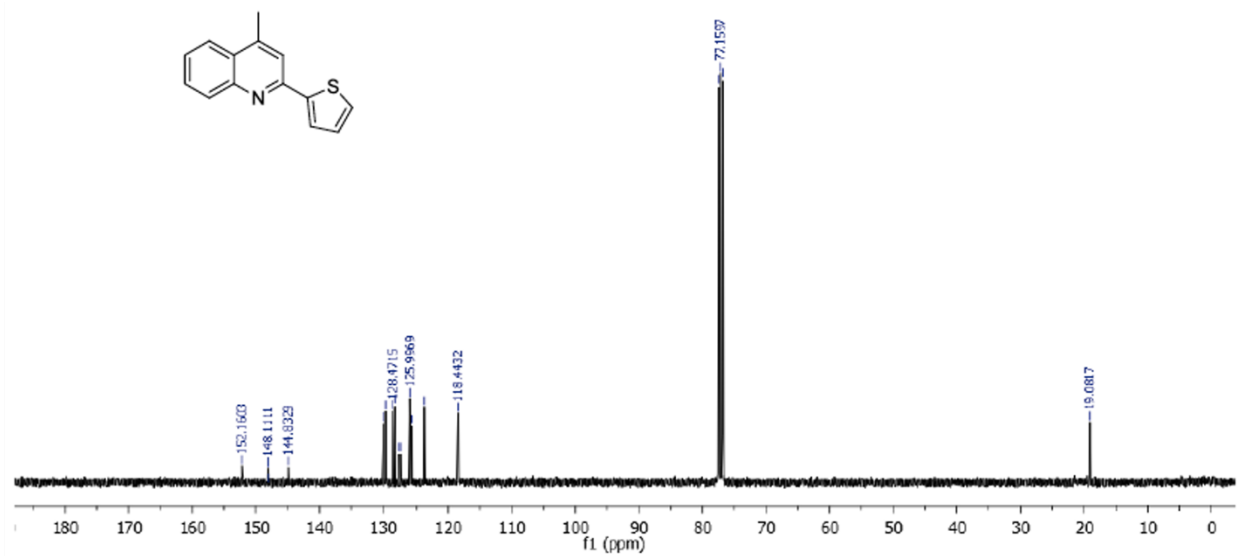

**Figure S21.** <sup>13</sup>C NMR spectrum of compound **9**, CDCl<sub>3</sub>, 101 MHz, 298 K.



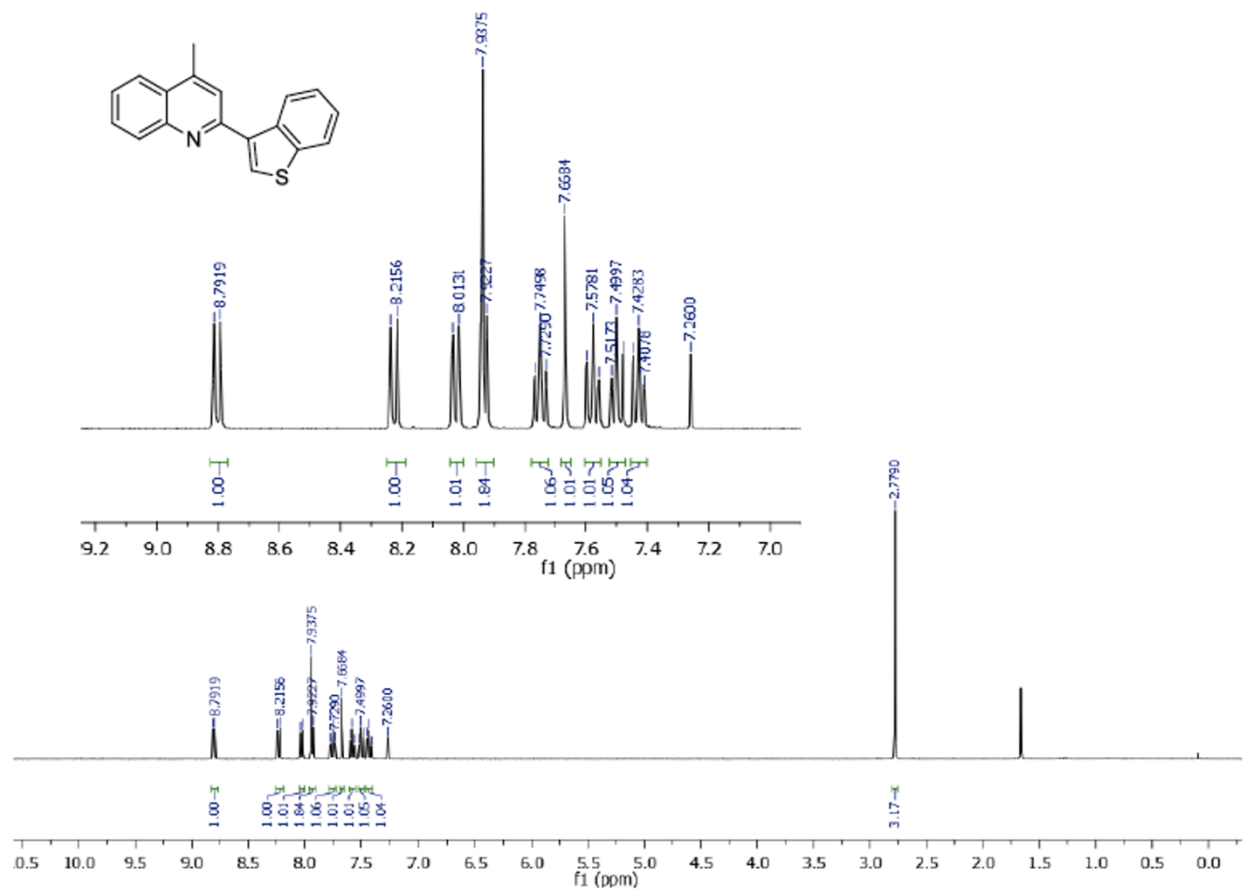

**Figure S22.** <sup>1</sup>H NMR spectrum of compound **10** with inset <sup>1</sup>H NMR spectrum expanded into aromatic region, CDCl<sub>3</sub>, 400 MHz, 298 K.

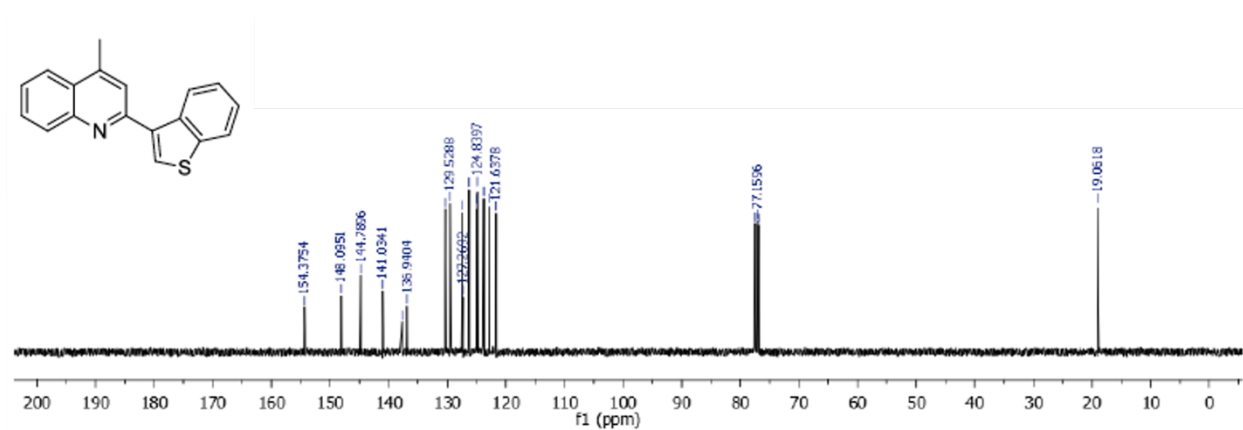

**Figure S23.** <sup>13</sup>C NMR spectrum of compound **10**, CDCl<sub>3</sub>, 101 MHz, 298 K.

**CHN Analyzer, Perkin Elmer 2400 Series II**

User's Name Barbora Balonova  
 Analyzed by: Patricia Granados  
 Date: 05-Dec-18  
 Standard Calibration Acetanilide  
 Supplier Perkin Elmer

| Expected Values                               | Carbon % | Hydrogen % | Nitrogen % |
|-----------------------------------------------|----------|------------|------------|
| QC: Cyclohexanone-2,4-dinitro-phenylhydrazone | 51.79    | 5.07       | 20.14      |
| BB387                                         | 78.51    | 4.76       | 5.09       |
| BB393                                         | 46.46    | 3.55       | 9.29       |

**Quality Control Standard Results**

| Sample Name | Weight mg | Carbon % | Hydrogen % | Nitrogen % |
|-------------|-----------|----------|------------|------------|
| QC          | 3.363     | 52.09    | 5.08       | 20.16      |
|             | 3.368     | 51.62    | 4.97       | 20.06      |

**Sample Results**

| Sample Name | Weight mg | Carbon % | Hydrogen % | Nitrogen % |
|-------------|-----------|----------|------------|------------|
| BB387       | 3.169     | 78.26    | 4.67       | 5.08       |
| BB387b      | 2.700     | 78.29    | 4.58       | 5.08       |
| BB393       | 2.787     | 46.16    | 3.66       | 9.49       |
| BB393b      | 2.553     | 45.90    | 3.59       | 9.49       |

**Figure S24.** Copy of elemental analysis for compound **10** (code used for analysis: BB 387). Expected values highlighted in red, measured in blue.

|                      |                                  |                         |                       |
|----------------------|----------------------------------|-------------------------|-----------------------|
| <b>Analysis Info</b> |                                  | <b>Acquisition Date</b> | 12/3/2018 10:26:00 AM |
| Analysis Name        | D:\Data\Xiao\Dec 03 2018\00023.d | Operator                | Administrator         |
| Method               | Xiao 1.m                         | Instrument              | micrOTOF 57           |
| Sample Name          | 367                              |                         |                       |
| Comment              |                                  |                         |                       |

|                              |          |                |          |                    |        |
|------------------------------|----------|----------------|----------|--------------------|--------|
| <b>Acquisition Parameter</b> |          |                |          | Set Corrector Fill | 45 V   |
| Source Type                  | ESI      | Ion Polarity   | Positive | Set Pulsar Pull    | 400 V  |
| Scan Range                   | n/a      | Capillary Exit | 100.0 V  | Set Pulsar Push    | 400 V  |
| Scan Begin                   | 50 m/z   | Hexapole RF    | 135.0 V  | Set Reflector      | 1300 V |
| Scan End                     | 1500 m/z | Skimmer 1      | 50.0 V   | Set Flight Tube    | 9000 V |
|                              |          | Hexapole 1     | 22.5 V   | Set Detector TOF   | 2200 V |

| Sum Formula                                                   | Sigma | m/z      | Err (ppm) | Mean Err (ppm) | rdB   | N Rules | e <sup>-</sup> |
|---------------------------------------------------------------|-------|----------|-----------|----------------|-------|---------|----------------|
| C <sub>18</sub> H <sub>14</sub> N <sub>1</sub> S <sub>1</sub> | 0.09  | 276.0841 | 0.51      | -0.03          | 12.50 | ok      | even           |

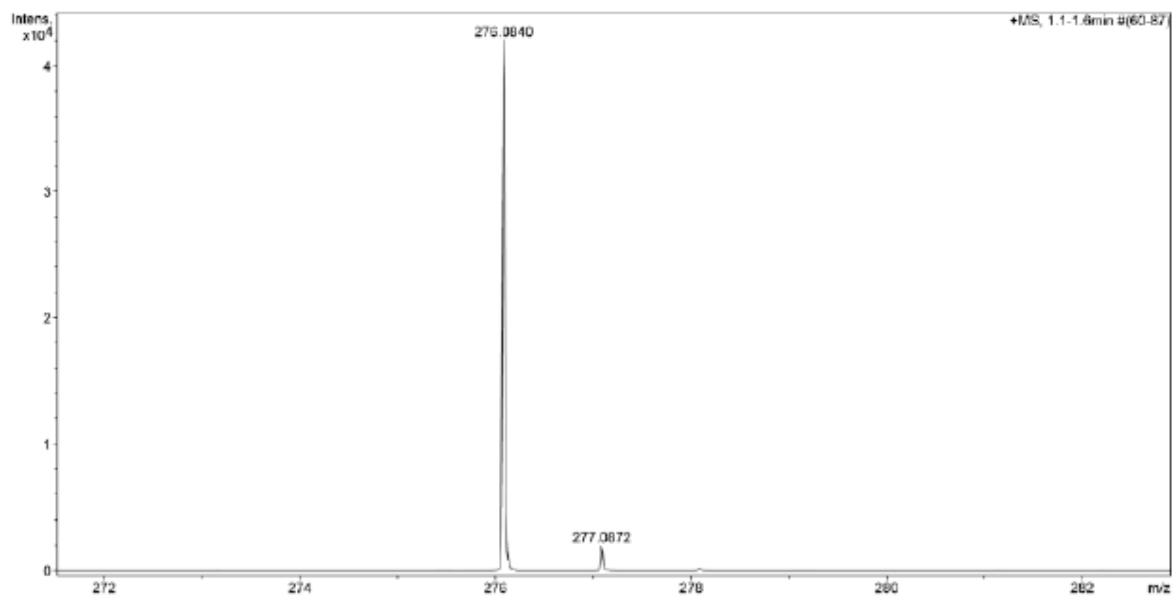

**Figure S25.** Mass spectrum of compound **10**. HRMS [ESI<sup>+</sup>] ion [C<sub>19</sub>H<sub>14</sub>NS]<sup>+</sup> m/z calculated: 276.0841. Found: 276.0840 [M<sup>+</sup>]. Anal.Calcd for C<sub>18</sub>H<sub>13</sub>NS

#### S4. UV-Vis, Excitation and Emission data

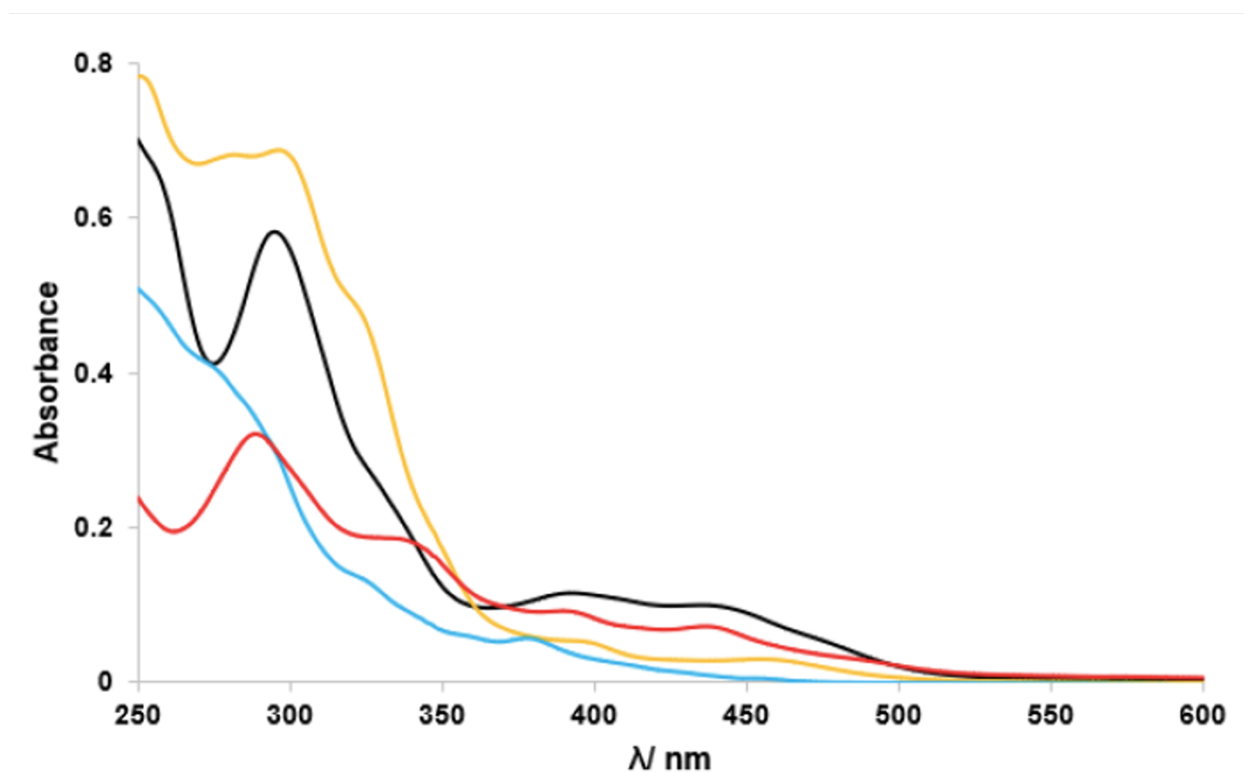

**Figure S26.** UV-vis absorption spectra of complexes **1** (blue line), **2** (yellow line), **3** (black line) and **4** (red line) in  $\text{CHCl}_3$ ,  $c = 1 \times 10^{-5} \text{ M}$ .

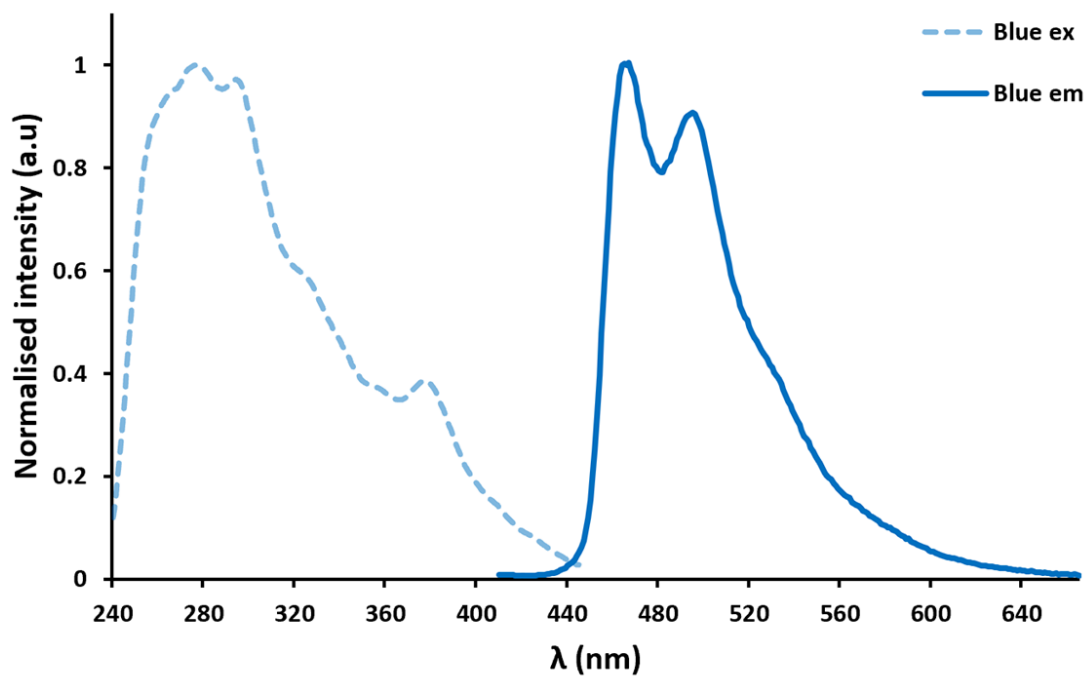

**Figure S27.** Normalised emission and excitation spectra of iridium complex **1** ( $c = 1 \times 10^{-5}$  M) measured in  $\text{CHCl}_3$  solution.

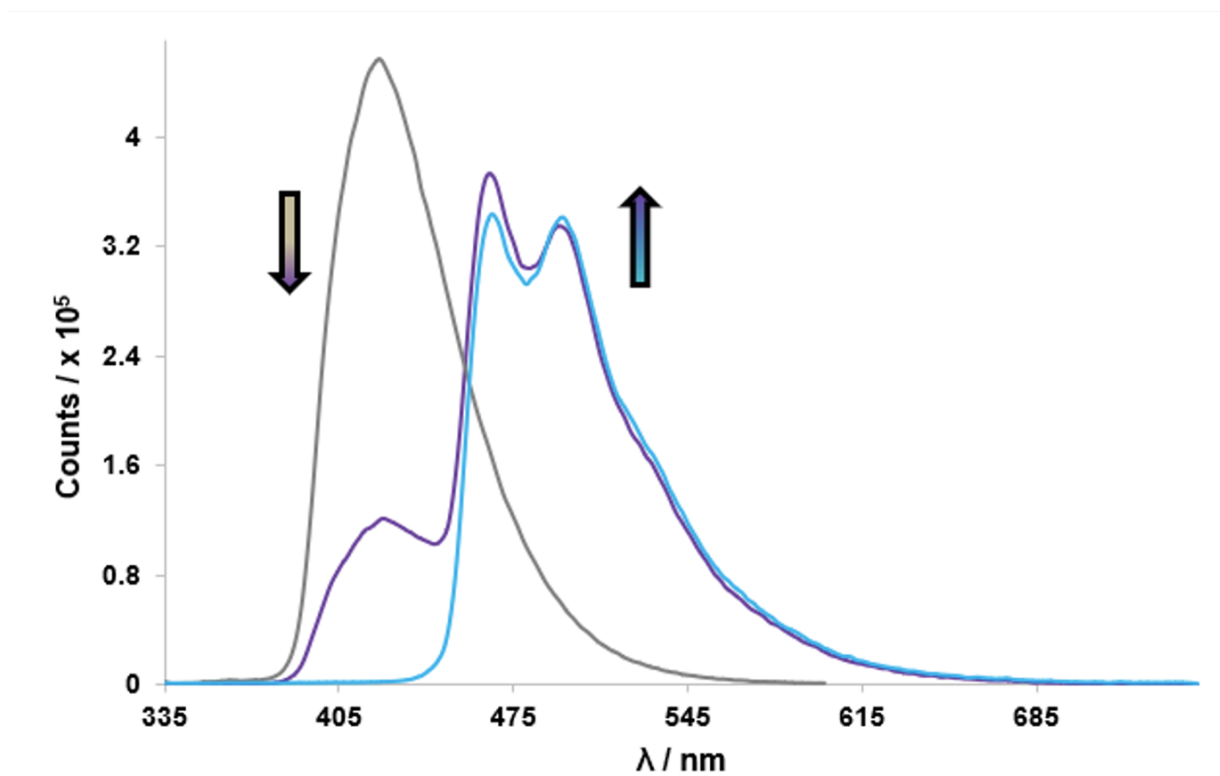

**Figure S28.** Overlaid emission spectra of complex **1** (blue), compound **5** (grey) and co-system **1•5** (purple) from FRET studies in  $\text{CHCl}_3$  solution. All samples excited at  $\lambda_{\text{ex}} = 350$  nm.

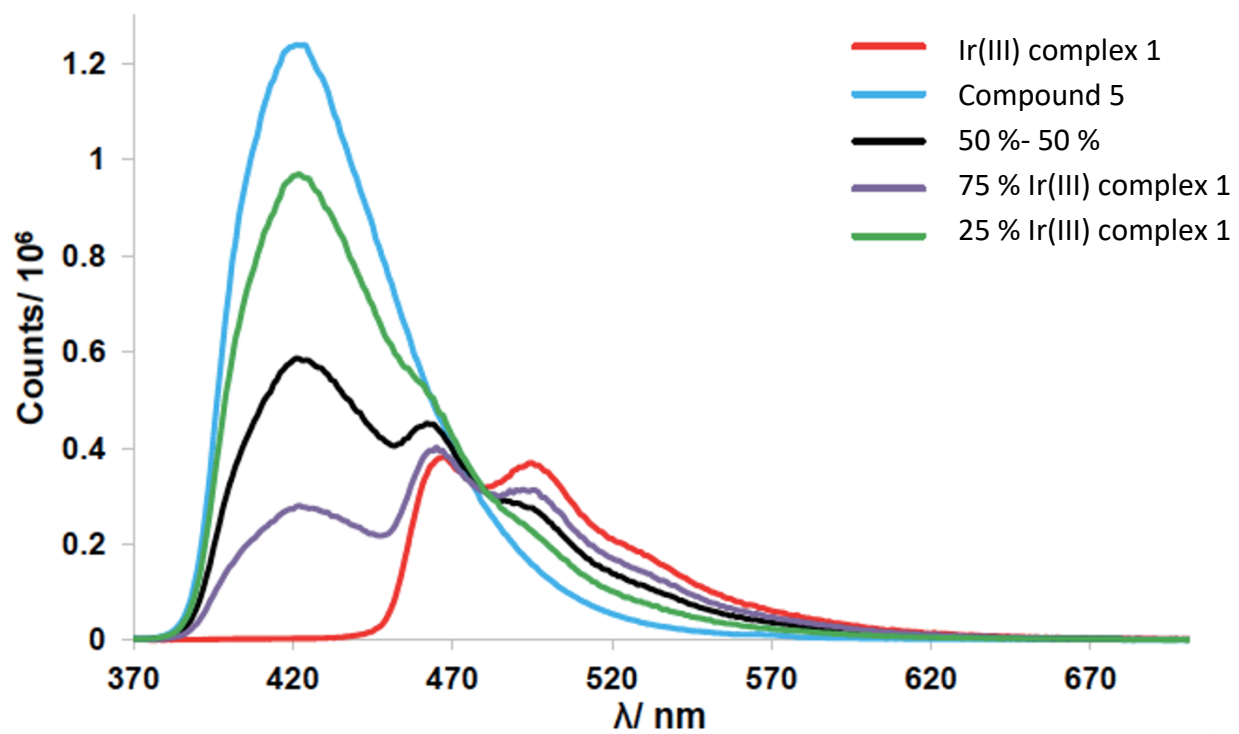

**Figure S29.** Emission spectra from studies of complex **1** with additions of compound **5** measured in CHCl<sub>3</sub> solution. All samples excited at 350 nm.

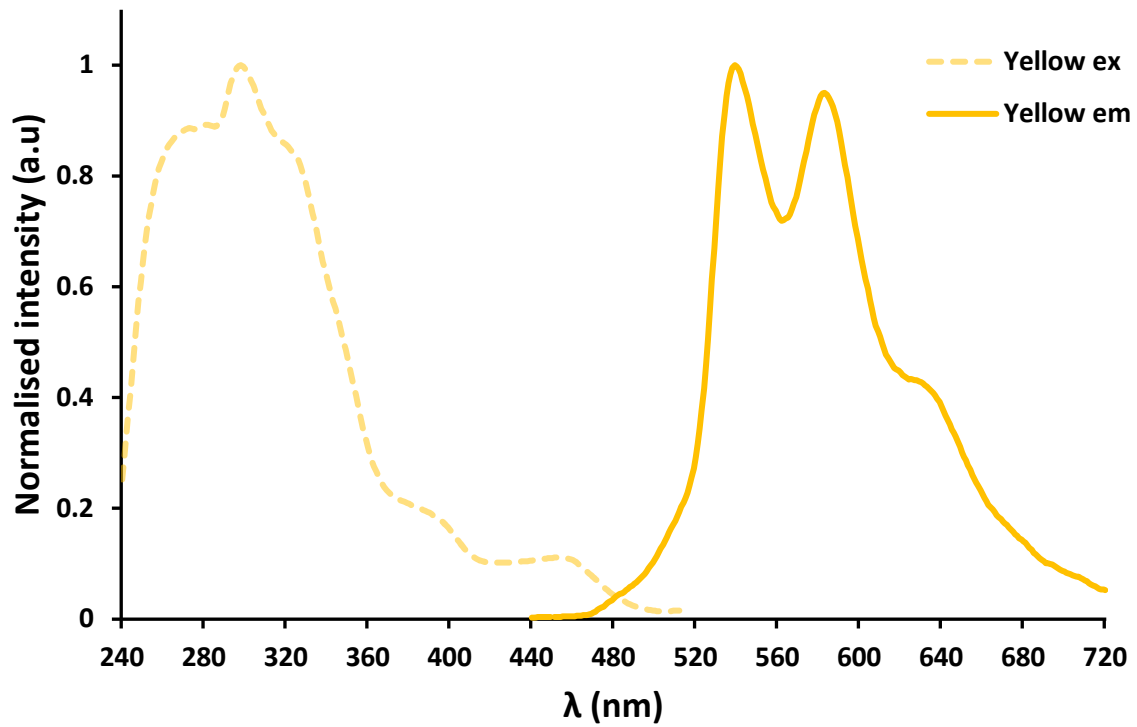

**Figure S30.** Normalised emission and excitation spectra of iridium complex **2** ( $c = 1 \times 10^{-5}$  M) measured in  $\text{CHCl}_3$  solution.



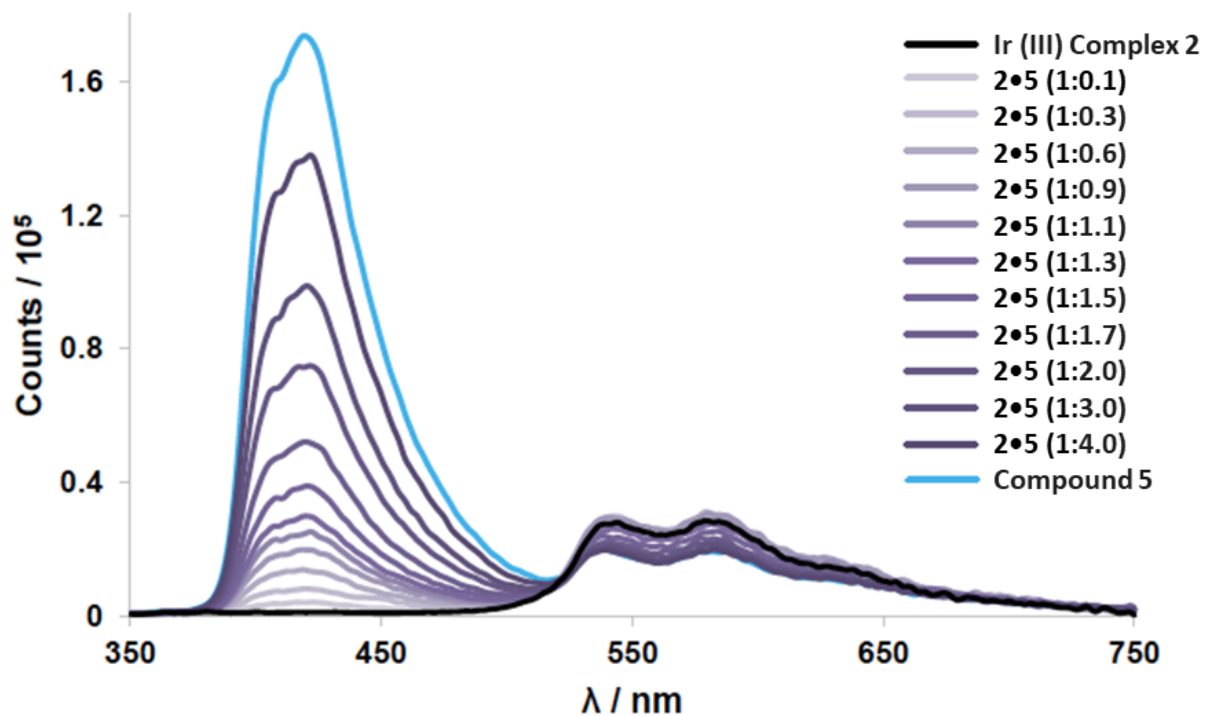

**Figure S31.** Emission spectra from titration studies of complex **2** with additions of compound **5** measured in  $\text{CHCl}_3$  solution. Black line represents emission of iridium complex **2** without any additions.

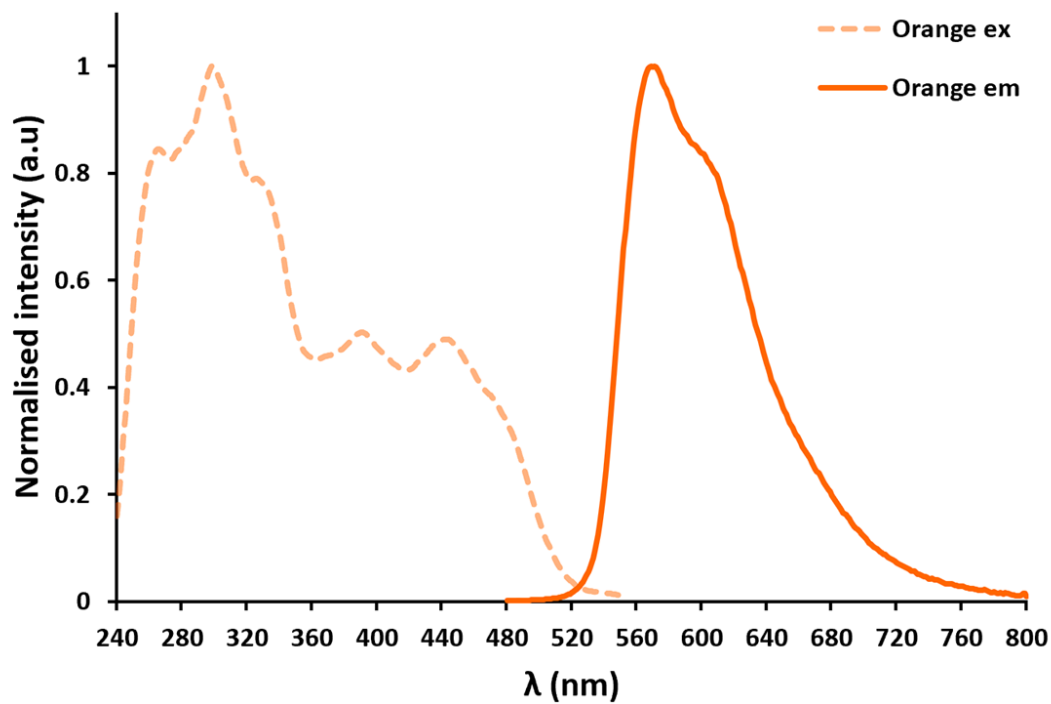

**Figure S32.** Normalised emission and excitation spectra of iridium complex **3** ( $c = 1 \times 10^{-5}$  M) measured in  $\text{CHCl}_3$  solution.

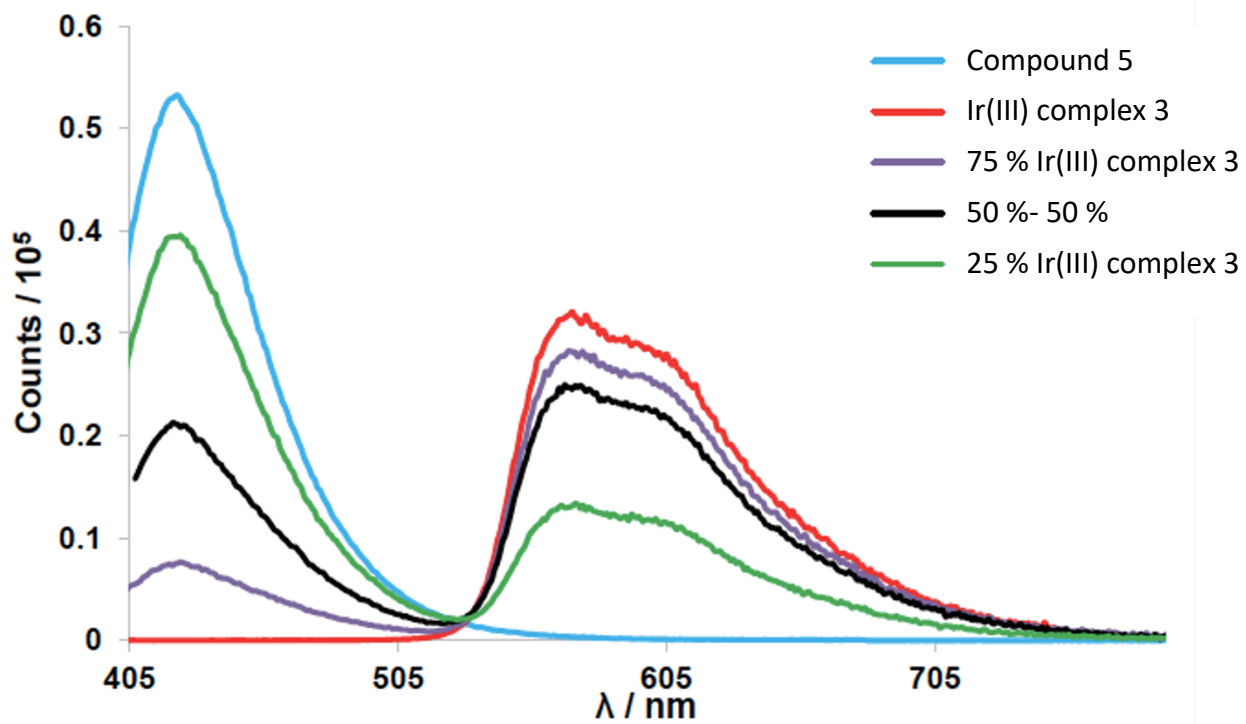

**Figure S33.** Emission spectra from studies of complex **3** with additions of compound **5** measured in  $\text{CHCl}_3$  solution. All samples excited at 350 nm.

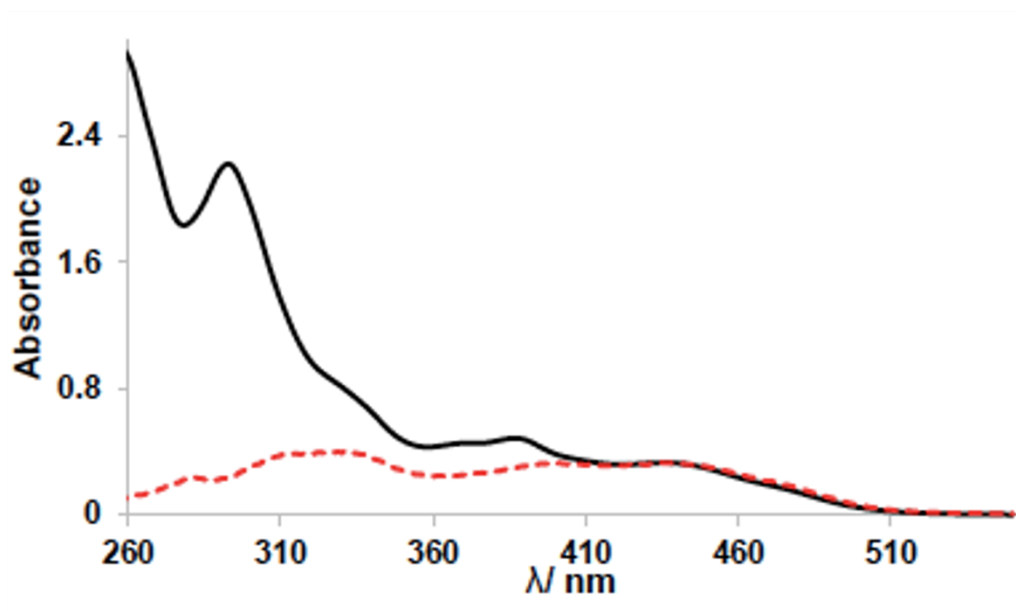

**Figure S34.** Absorption (solid black line) and corrected PL excitation (red dashed line measured at 570 nm) for co-system **3•5** (1:1 ratio). Spectra normalised to absorbance at 440 nm.

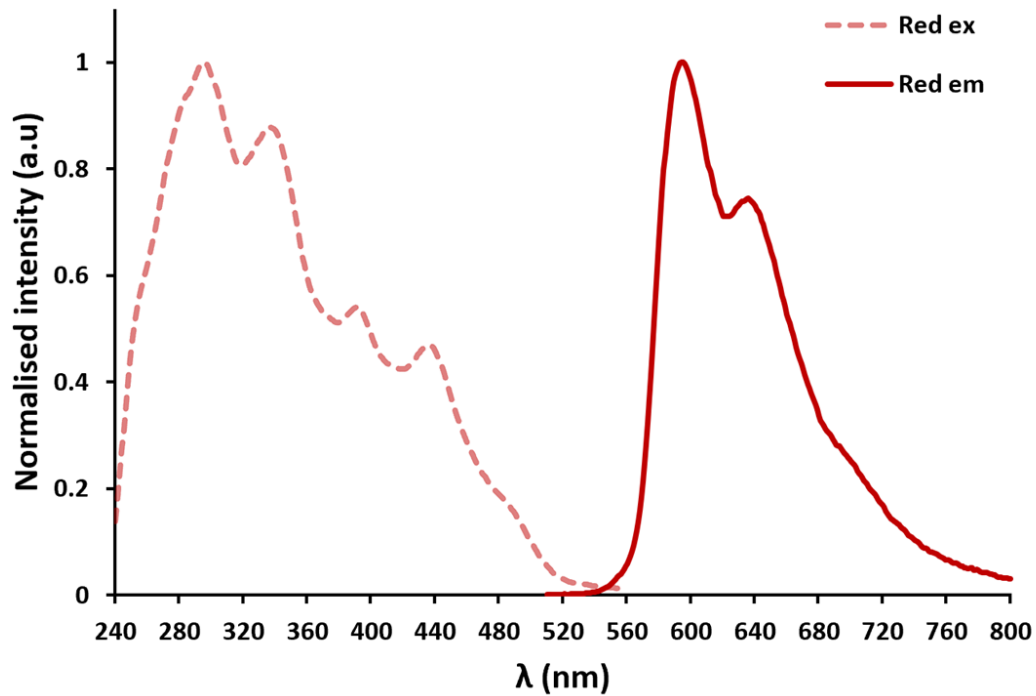

**Figure S35.** Normalised emission and excitation spectra of iridium complex **4** ( $c = 1 \times 10^{-5}$  M) measured in  $\text{CHCl}_3$  solution.

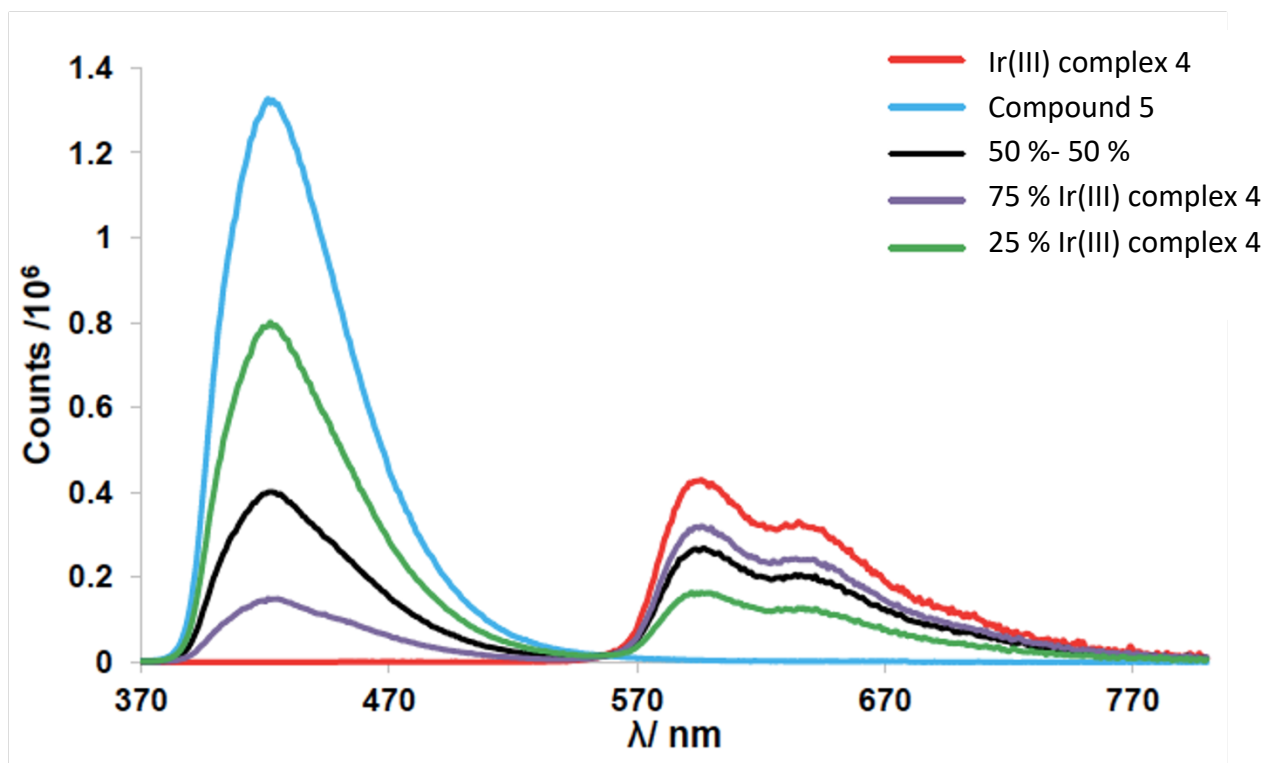

**Figure S36.** Emission spectra from studies of complex 4 with additions of compound 5 measured in CHCl<sub>3</sub> solution. All samples excited at 360 nm.

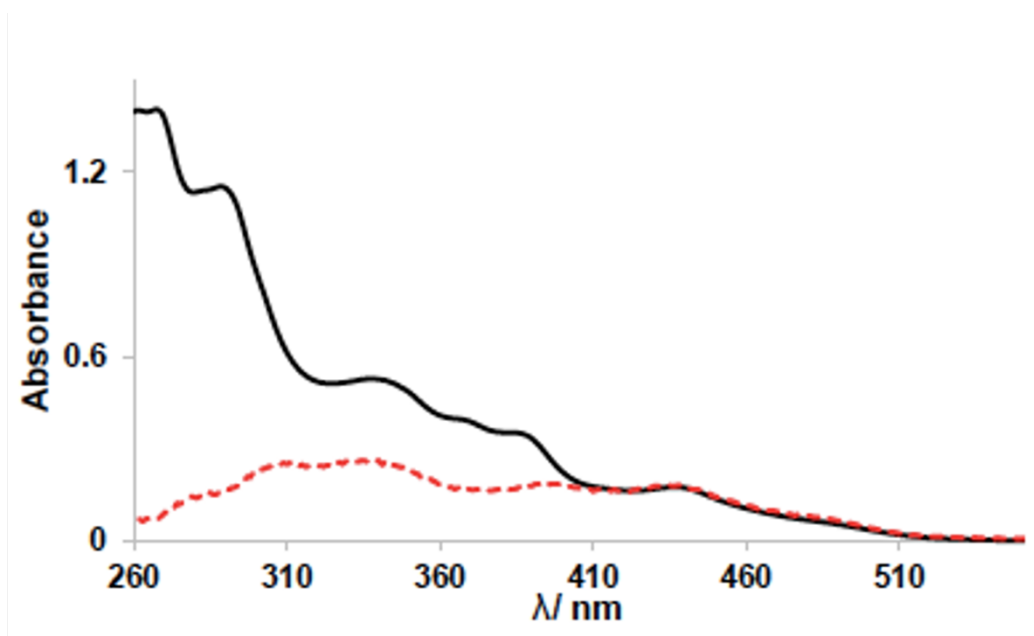

**Figure S37.** Absorption (solid black line) and corrected PL excitation (red dashed line measured at 640 nm) for co-system **4•5** (1:1 ratio). Spectra normalised to absorbance at 440 nm.

## S5. $K_a$ Binding studies

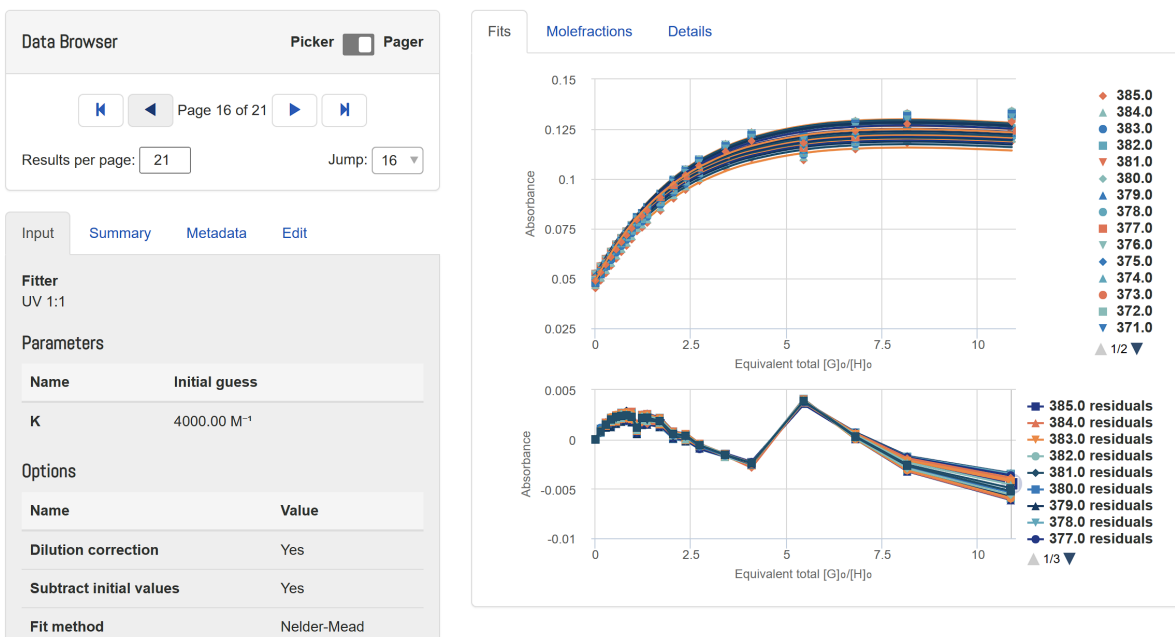

**Figure S38.** Screenshot of linear regression bindfit calculation data of co-system **1•5**.

Links to open-source calculations of titration runs presented below.<sup>3</sup>

1: <http://app.supramolecular.org/bindfit/view/6ff69500-3339-4738-9efd-23f07acd5d88>

2: <http://app.supramolecular.org/bindfit/view/89e37f52-eea5-43b1-8af7-c9bf5eba4444>

3: <http://app.supramolecular.org/bindfit/view/c55ba47e-2dc6-4f59-9c9b-fab6a62341fd>



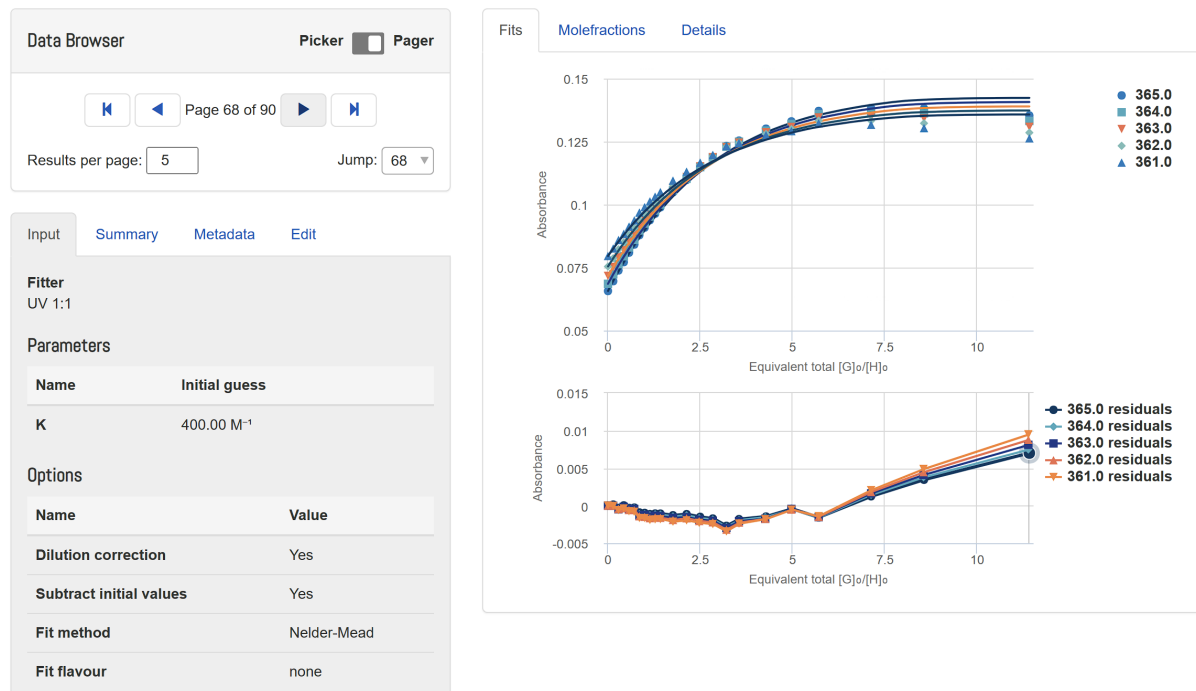

**Figure S39.** Screenshot of linear regression bindfit calculation data of co-system **2•5**.

Links to open-source calculations of titration runs presented below.<sup>3</sup>

1: <http://app.supramolecular.org/bindfit/view/392ca8d9-acb3-474b-af2c-86083be9da51>

2: <http://app.supramolecular.org/bindfit/view/6b743661-c2e6-404b-a8b9-cf56a2b4afde>

Data Browser Picker  Pager

Page 70 of 90

Results per page: 5 Jump: 70

Input Summary Metadata Edit

**Fitter**  
UV 1:1

**Parameters**

| Name | Initial guess           |
|------|-------------------------|
| K    | 1000.00 M <sup>-1</sup> |

**Options**

| Name                    | Value       |
|-------------------------|-------------|
| Dilution correction     | Yes         |
| Subtract initial values | Yes         |
| Fit method              | Nelder-Mead |
| Fit flavour             | none        |

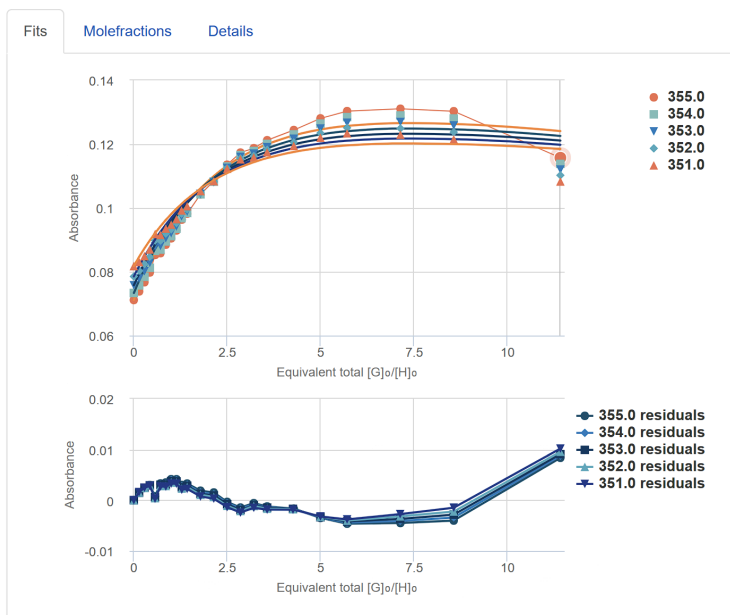

**Figure S40.** Screenshot of linear regression bindfit calculation data of co-system **3•5**.

Links to open-source calculations of titration runs presented below.<sup>3</sup>

1: <http://app.supramolecular.org/bindfit/view/ee837607-e4fb-4ad8-b225-3b3304dbbf66>

2: <http://app.supramolecular.org/bindfit/view/8c71c12c-8169-433c-b70f-168e0cdb444f>

Data Browser Picker  Pager

Page 68 of 90

Results per page: 5 Jump: 68

---

Input Summary Metadata Edit

**Fitter**  
UV 1:1

**Parameters**

| Name | Initial guess            |
|------|--------------------------|
| K    | 10000.00 M <sup>-1</sup> |

**Options**

| Name                    | Value       |
|-------------------------|-------------|
| Dilution correction     | Yes         |
| Subtract initial values | Yes         |
| Fit method              | Nelder-Mead |
| Fit flavour             | none        |

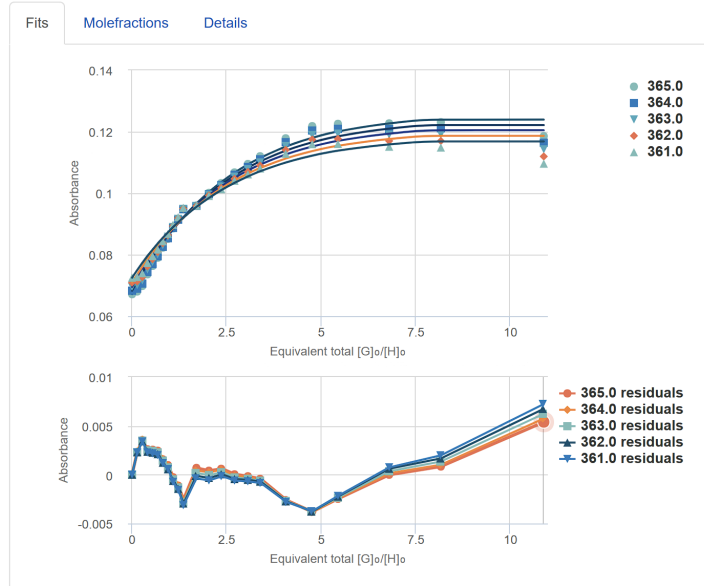

**Figure S41.** Screenshot of linear regression bindfit calculation data of co-system 4•5.

Links to open-source calculations of titration runs presented below.<sup>3</sup>

1: <http://app.supramolecular.org/bindfit/view/f065cb38-22f6-49af-9fdf-05343806e3b9>

2: <http://app.supramolecular.org/bindfit/view/39e932ce-5180-4a64-b925-cb0ea5f36c70>

3: <http://app.supramolecular.org/bindfit/view/715e6a14-22b3-4f98-8c13-8129e238e812>

## S6. PLQYs and decay lifetimes

**Table S2. a)** Significant excitation and emission peaks for Ir(III) complexes **1-4**; in CHCl<sub>3</sub> degassed for 1 min (Argon) at 298 K. **b)** PLQYs for Ir(III) complexes **1-4**; in CHCl<sub>3</sub> degassed for 20 mins (Ar) at 298 K determined using the relative method with quinine sulfate in 0.1 M H<sub>2</sub>SO<sub>4</sub> as a reference ( $\phi_{\text{PL}}=54.6\%$ ) for wavelengths between 400-480 nm. The other references were rhodamine 6G in ethanol (PLQY 95 %) for wavelengths 480-560 nm and rhodamine B in ethanol (PLQY 56 %) for wavelengths above 560 nm. **c)** decay lifetimes using TCSPC excited at 365 nm and their corresponding chi-squared values for Ir(III) complexes **1-4**; in CHCl<sub>3</sub> degassed for 20 mins (Ar) at 298 K. Complexes **1, 2, 3, and 4** decay biexponentially. **d)** the radiative ( $k_r$ ) and nonradiative ( $k_{nr}$ ) rate constants were calculated as  $k_r = \phi_{\text{PL}}/\tau_{\text{PL}}$  and  $k_{nr} = (1-\phi_{\text{PL}})/\tau_{\text{PL}}$ .

| Ir(III)<br>Complex | Excitation<br>(nm) <sup>a</sup> | Emission<br>(nm) <sup>a</sup> | PLQY<br>(%) <sup>b</sup> | Lifetime (ns)<br>( $\tau_{\text{PL}}, \chi^2$ ) <sup>c</sup> | $k_r$<br>( $\times 10^5 \text{ s}^{-1}$ ) <sup>d</sup> | $k_{nr}$<br>( $\times 10^5 \text{ s}^{-1}$ ) <sup>d</sup> |
|--------------------|---------------------------------|-------------------------------|--------------------------|--------------------------------------------------------------|--------------------------------------------------------|-----------------------------------------------------------|
| <b>1</b>           | 264, 378                        | 467, 493                      | 86.7                     | (2260.07, 1.057) (79%)                                       | 3.84                                                   | 0.59                                                      |
| <b>2</b>           | 296, 320                        | 548, 583                      | 8.7                      | (1.94, 1.029)                                                | 448.45                                                 | 4706.19                                                   |
| <b>3</b>           | 298, 332                        | 570                           | 23.4                     | (1703.39, 0.991) (65%)                                       | 1.38                                                   | 4.50                                                      |
| <b>4</b>           | 296, 338                        | 594, 640                      | 36.1                     | (3623.93, 0.976)                                             | 1.00                                                   | 1.76                                                      |
| <b>1•5</b> (1:1)   | 280, 378                        | 425, 462                      | 82.2                     | (2088.43, 0.922) (97%)                                       | 0.39                                                   | 0.85                                                      |
| <b>2•5</b> (1:1)   | 298, 325                        | 538, 584                      | 15.6                     | (3.62, 1.186)                                                | 430.94                                                 | 2331.49                                                   |
| <b>3•5</b> (1:1)   | 297, 340                        | 570                           | 43.3                     | (4298.43, 0.972) (90%)                                       | 1.01                                                   | 1.32                                                      |
| <b>4•5</b> (1:1)   | 308, 391                        | 596, 638                      | 41.4                     | (3586.05, 0.994) (99%)                                       | 1.15                                                   | 1.63                                                      |
| <b>2•5</b> (1:1.3) | 298, 326                        | 538, 584                      | 33.2                     | (3.37, 1.372)                                                | 985.16                                                 | 1982.20                                                   |

**Table S3.** PLQY of Ir(III) complex **1**; in CHCl<sub>3</sub> degassed for 20 mins (Ar) at 298 K, excited at 350 nm.

| Table 1: Data Concerning the Standard |                     |          |          | Table 2: Data Concerning the Sample |                   |          |          |
|---------------------------------------|---------------------|----------|----------|-------------------------------------|-------------------|----------|----------|
| Stock solution reference              | Quinine Sulfate     |          |          | Sample Structure                    | IrBG              |          |          |
| Solvent                               | 0.1 M Sulfuric Acid |          |          | Solvent                             | CHCl <sub>3</sub> |          |          |
| Refractive Index                      | 1.33                |          |          | Refractive Index                    | 1.445             |          |          |
| Wavelength used (nm)                  | 350                 |          |          | Wavelength used (nm)                | 350               |          |          |
| Run                                   | 1                   | 2        | 3        | Run                                 | 1                 | 2        | 3        |
| Volume of Mother solution (mL)        | 3                   | 3        | 3        | Volume of Mother solution (mL)      | 3.05              | 3.05     | 3.05     |
| Theoretical Abs (optical)             | 0.065               | 0.065    | 0.065    | Total Volume (mL)                   | 3                 | 3        | 3        |
| Theoretical Abs (average)             | 0.065               |          |          | Theoretical Abs (optical)           | 0.065             | 0.065    | 0.065    |
| Emission Integral                     | 4.67E+07            | 4.49E+07 | 4.38E+07 | Theoretical Abs (average)           | 0.065             |          |          |
| Emission Integral (average)           | 4.51E+07            |          |          | Emission Integral                   | 6.26E+07          | 6.11E+07 | 6.03E+07 |
| Standard Quantum Yield (%)            | 54.6                |          |          | Emission Integral (average)         | 6.13E+07          |          |          |
|                                       |                     |          |          | Calculated QY (%)                   | 87.66             |          |          |

**Table S4.** PLQY of Ir(III) complex **2**; in CHCl<sub>3</sub> degassed for 20 mins (Ar) at 298 K, excited at 350 nm.

| Table 1: Data Concerning the Standard |              |          |          | Table 2: Data Concerning the Sample |                   |          |          |
|---------------------------------------|--------------|----------|----------|-------------------------------------|-------------------|----------|----------|
| Stock solution reference              | Rhodamine 6G |          |          | Sample Structure                    | IrYG              |          |          |
| Solvent                               | Ethanol      |          |          | Solvent                             | CHCl <sub>3</sub> |          |          |
| Refractive Index                      | 1.36         |          |          | Refractive Index                    | 1.445             |          |          |
| Wavelength used (nm)                  | 350          |          |          | Wavelength used (nm)                | 350               |          |          |
| Run                                   | 1            | 2        | 3        | Run                                 | 1                 | 2        | 3        |
| Volume of Mother solution (mL)        | 3            | 3        | 3        | Volume of Mother solution (mL)      | 3.05              | 3.05     | 3.05     |
| Theoretical Abs (optical)             | 0.084        | 0.085    | 0.085    | Total Volume (mL)                   | 3                 | 3        | 3        |
| Theoretical Abs (average)             | 0.084666667  |          |          | Theoretical Abs (optical)           | 0.084             | 0.082    | 0.081    |
| Emission Integral                     | 4.43E+07     | 4.49E+07 | 4.38E+07 | Theoretical Abs (average)           | 0.082333333       |          |          |
| Emission Integral (average)           | 4.43E+07     |          |          | Emission Integral                   | 3.49E+06          | 3.49E+06 | 3.48E+06 |
| Standard Quantum Yield (%)            | 95           |          |          | Emission Integral (average)         | 3.48E+06          |          |          |
|                                       |              |          |          | Calculated QY (%)                   | 8.66              |          |          |

**Table S5.** PLQY of Ir(III) complex **3**; in CHCl<sub>3</sub> degassed for 20 mins (Ar) at 298 K, excited at 350 nm.

| Table 1: Data Concerning the Standard |              |          |          | Table 2: Data Concerning the Sample |                   |          |          |
|---------------------------------------|--------------|----------|----------|-------------------------------------|-------------------|----------|----------|
| Stock solution reference              | Rhodamine RG |          |          | Sample Structure                    | IrOG              |          |          |
| Solvent                               | ethanol      |          |          | Solvent                             | CHCl <sub>3</sub> |          |          |
| Refractive Index                      | 1.36         |          |          | Refractive Index                    | 1.445             |          |          |
| Wavelength used (nm)                  | 350          |          |          | Wavelength used (nm)                | 350               |          |          |
| Run                                   | 1            | 2        | 3        | Run                                 | 1                 | 2        | 3        |
| Volume of Mother solution (mL)        | 3            | 3        | 3        | Volume of Mother solution (mL)      | 3.05              | 3.05     | 3.05     |
| Theoretical Abs (optical)             | 0.084        | 0.083    | 0.081    | Total Volume (mL)                   | 3                 | 3        | 3        |
| Theoretical Abs (average)             | 0.082666667  |          |          | Theoretical Abs (optical)           | 0.072             | 0.07     | 0.069    |
| Emission Integral                     | 4.43E+07     | 4.49E+07 | 4.38E+07 | Theoretical Abs (average)           | 0.070333333       |          |          |
| Emission Integral (average)           | 4.43E+07     |          |          | Emission Integral                   | 8.31E+06          | 8.23E+06 | 8.13E+06 |
| Standard Quantum Yield (%)            | 95           |          |          | Emission Integral (average)         | 8.22E+06          |          |          |
|                                       |              |          |          | Calculated QY (%)                   | 23.38             |          |          |

**Table S6.** PLQY of Ir(III) complex **4**; in CHCl<sub>3</sub> degassed for 20 mins (Ar) at 298 K, excited at 350 nm.

| Table 1: Data Concerning the Standard |             |          |          |
|---------------------------------------|-------------|----------|----------|
| Stock solution reference              | Rhodamine B |          |          |
| Solvent                               | Ethanol     |          |          |
| Refractive Index                      | 1.36        |          |          |
| Wavelength used (nm)                  | 350         |          |          |
| Run                                   | 1           | 2        | 3        |
| Volume of Mother solution (mL)        | 3           | 3        | 3        |
| Theoretical Abs (optical)             | 0.08        | 0.079    | 0.081    |
| Theoretical Abs (average)             | 0.08        |          |          |
| Emission Integral                     | 9.52E+07    | 4.49E+07 | 4.38E+07 |
| Emission Integral (average)           | 6.13E+07    |          |          |
| Standard Quantum Yield (%)            | 56          |          |          |

| Table 2: Data Concerning the Sample |                   |          |          |
|-------------------------------------|-------------------|----------|----------|
| Sample Structure                    | IrRG              |          |          |
| Solvent                             | CHCl <sub>3</sub> |          |          |
| Refractive Index                    | 1.445             |          |          |
| Wavelength used (nm)                | 350               |          |          |
| Run                                 | 1                 | 2        | 3        |
| Volume of Mother solution (mL)      | 3.05              | 3.05     | 3.05     |
| Total Volume (mL)                   | 3                 | 3        | 3        |
| Theoretical Abs (optical)           | 0.08              | 0.076    | 0.074    |
| Theoretical Abs (average)           | 0.07666667        |          |          |
| Emission Integral                   | 3.38E+07          | 3.35E+07 | 3.33E+07 |
| Emission Integral (average)         | 3.35E+07          |          |          |
| Calculated QY (%)                   | 36.08             |          |          |

**Table S7.** PLQY of Ir(III) complex with DAA 1•5 (1:1); in CHCl<sub>3</sub> degassed for 20 mins (Ar) at 298 K, excited at 350 nm.

| Table 1: Data Concerning the Standard |                     |          |          |
|---------------------------------------|---------------------|----------|----------|
| Stock solution reference              | Quinine Sulfate     |          |          |
| Solvent                               | 0.1 M Sulfuric Acid |          |          |
| Refractive Index                      | 1.33                |          |          |
| Wavelength used (nm)                  | 350                 |          |          |
| Run                                   | 1                   | 2        | 3        |
| Volume of Mother solution (mL)        | 3                   | 3        | 3        |
| Theoretical Abs (optical)             | 0.065               | 0.065    | 0.065    |
| Theoretical Abs (average)             | 0.065               |          |          |
| Emission Integral                     | 4.67E+07            | 4.49E+07 | 4.38E+07 |
| Emission Integral (average)           | 4.51E+07            |          |          |
| Standard Quantum Yield (%)            | 54.6                |          |          |

| Table 2: Data Concerning the Sample |                   |          |          |
|-------------------------------------|-------------------|----------|----------|
| Sample Structure                    | IrBG:DAA          |          |          |
| Solvent                             | CHCl <sub>3</sub> |          |          |
| Refractive Index                    | 1.445             |          |          |
| Wavelength used (nm)                | 350               |          |          |
| Run                                 | 1                 | 2        | 3        |
| Volume of Mother solution (mL)      | 3.05              | 3.05     | 3.05     |
| Total Volume (mL)                   | 3                 | 3        | 3        |
| Theoretical Abs (optical)           | 0.065             | 0.065    | 0.065    |
| Theoretical Abs (average)           | 0.065             |          |          |
| Emission Integral                   | 5.91E+07          | 5.75E+07 | 5.59E+07 |
| Emission Integral (average)         | 5.75E+07          |          |          |
| Calculated QY (%)                   | 82.17             |          |          |

**Table S8.** PLQY of Ir(III) complex with DAA 2•5 (1:1); in CHCl<sub>3</sub> degassed for 20 mins (Ar) at 298 K, excited at 350 nm.

| Table 1: Data Concerning the Standard |              |          |          |
|---------------------------------------|--------------|----------|----------|
| Stock solution reference              | Rhodamine 6G |          |          |
| Solvent                               | Ethanol      |          |          |
| Refractive Index                      | 1.36         |          |          |
| Wavelength used (nm)                  | 350          |          |          |
| Run                                   | 1            | 2        | 3        |
| Volume of Mother solution (mL)        | 3            | 3        | 3        |
| Theoretical Abs (optical)             | 0.081        | 0.08     | 0.079    |
| Theoretical Abs (average)             | 0.08         |          |          |
| Emission Integral                     | 4.43E+07     | 4.49E+07 | 4.38E+07 |
| Emission Integral (average)           | 4.43E+07     |          |          |
| Standard Quantum Yield (%)            | 95           |          |          |

| Table 2: Data Concerning the Sample |                   |          |          |
|-------------------------------------|-------------------|----------|----------|
| Sample Structure                    | IrYG:DAA          |          |          |
| Solvent                             | CHCl <sub>3</sub> |          |          |
| Refractive Index                    | 1.445             |          |          |
| Wavelength used (nm)                | 350               |          |          |
| Run                                 | 1                 | 2        | 3        |
| Volume of Mother solution (mL)      | 3.05              | 3.05     | 3.05     |
| Total Volume (mL)                   | 3                 | 3        | 3        |
| Theoretical Abs (optical)           | 0.085             | 0.081    | 0.079    |
| Theoretical Abs (average)           | 0.08166667        |          |          |
| Emission Integral                   | 6.64E+06          | 6.56E+06 | 6.57E+06 |
| Emission Integral (average)         | 6.59E+06          |          |          |
| Calculated QY (%)                   | 15.61             |          |          |

**Table S9.** PLQY of Ir(III) complex with DAA **3•5** (1:1); in CHCl<sub>3</sub> degassed for 20 mins (Ar) at 298 K, excited at 350 nm.

| Table 1: Data Concerning the Standard |              |          |          | Table 2: Data Concerning the Sample |                   |          |          |
|---------------------------------------|--------------|----------|----------|-------------------------------------|-------------------|----------|----------|
| Stock solution reference              | Rhodamine RG |          |          | Sample Structure                    | IrOG:DAA          |          |          |
| Solvent                               | ethanol      |          |          | Solvent                             | CHCl <sub>3</sub> |          |          |
| Refractive Index                      | 1.36         |          |          | Refractive Index                    | 1.445             |          |          |
| Wavelength used (nm)                  | 350          |          |          | Wavelength used (nm)                | 350               |          |          |
| Run                                   | 1            | 2        | 3        | Run                                 | 1                 | 2        | 3        |
| Volume of Mother solution (mL)        | 3            | 3        | 3        | Volume of Mother solution (mL)      | 3.05              | 3.05     | 3.05     |
| Theoretical Abs (optical)             | 0.084        | 0.083    | 0.081    | Total Volume (mL)                   | 3                 | 3        | 3        |
| Theoretical Abs (average)             | 0.082666667  |          |          | Theoretical Abs (optical)           | 0.08              | 0.074    | 0.078    |
| Emission Integral                     | 4.43E+07     | 4.49E+07 | 4.38E+07 | Theoretical Abs (average)           | 0.077333333       |          |          |
| Emission Integral (average)           | 4.43E+07     |          |          | Emission Integral                   | 1.66E+07          | 1.67E+07 | 1.68E+07 |
| Standard Quantum Yield (%)            | 95           |          |          | Emission Integral (average)         | 1.67E+07          |          |          |
|                                       |              |          |          | Calculated QY (%)                   | 43.25             |          |          |

**Table S10.** PLQY of Ir(III) complex with DAA **4•5** (1:1); in CHCl<sub>3</sub> degassed for 20 mins (Ar) at 298 K, excited at 350 nm.

| Table 1: Data Concerning the Standard |             |          |          | Table 2: Data Concerning the Sample |                   |          |          |
|---------------------------------------|-------------|----------|----------|-------------------------------------|-------------------|----------|----------|
| Stock solution reference              | Rhodamine B |          |          | Sample Structure                    | IrRG:DAA          |          |          |
| Solvent                               | Ethanol     |          |          | Solvent                             | CHCl <sub>3</sub> |          |          |
| Refractive Index                      | 1.36        |          |          | Refractive Index                    | 1.445             |          |          |
| Wavelength used (nm)                  | 350         |          |          | Wavelength used (nm)                | 350               |          |          |
| Run                                   | 1           | 2        | 3        | Run                                 | 1                 | 2        | 3        |
| Volume of Mother solution (mL)        | 3           | 3        | 3        | Volume of Mother solution (mL)      | 3.05              | 3.05     | 3.05     |
| Theoretical Abs (optical)             | 0.08        | 0.079    | 0.081    | Total Volume (mL)                   | 3                 | 3        | 3        |
| Theoretical Abs (average)             | 0.08        |          |          | Theoretical Abs (optical)           | 0.085             | 0.084    | 0.085    |
| Emission Integral                     | 9.52E+07    | 4.49E+07 | 4.38E+07 | Theoretical Abs (average)           | 0.084666667       |          |          |
| Emission Integral (average)           | 6.13E+07    |          |          | Emission Integral                   | 4.26E+07          | 4.24E+07 | 4.24E+07 |
| Standard Quantum Yield (%)            | 56          |          |          | Emission Integral (average)         | 4.24E+07          |          |          |
|                                       |             |          |          | Calculated QY (%)                   | 41.38             |          |          |

**Table S11.** PLQY of Ir(III) complex with DAA **2•5** tuned for white light emission (1:1.3); in CHCl<sub>3</sub> degassed for 20 mins (Ar) at 298 K, excited at 350 nm.

| Table 1: Data Concerning the Standard |              |          |          | Table 2: Data Concerning the Sample |                        |          |          |
|---------------------------------------|--------------|----------|----------|-------------------------------------|------------------------|----------|----------|
| Stock solution reference              | Rhodamine 6G |          |          | Sample Structure                    | IrYG:DAA (white light) |          |          |
| Solvent                               | Ethanol      |          |          | Solvent                             | CHCl <sub>3</sub>      |          |          |
| Refractive Index                      | 1.36         |          |          | Refractive Index                    | 1.445                  |          |          |
| Wavelength used (nm)                  | 350          |          |          | Wavelength used (nm)                | 350                    |          |          |
| Run                                   | 1            | 2        | 3        | Run                                 | 1                      | 2        | 3        |
| Volume of Mother solution (mL)        | 3            | 3        | 3        | Volume of Mother solution (mL)      | 3.05                   | 3.05     | 3.05     |
| Theoretical Abs (optical)             | 0.081        | 0.08     | 0.08     | Total Volume (mL)                   | 3                      | 3        | 3        |
| Theoretical Abs (average)             | 0.080333333  |          |          | Theoretical Abs (optical)           | 0.084                  | 0.082    | 0.081    |
| Emission Integral                     | 4.43E+07     | 4.49E+07 | 4.38E+07 | Theoretical Abs (average)           | 0.082333333            |          |          |
| Emission Integral (average)           | 4.43E+07     |          |          | Emission Integral                   | 1.43E+07               | 1.40E+07 | 1.39E+07 |
| Standard Quantum Yield (%)            | 95           |          |          | Emission Integral (average)         | 1.41E+07               |          |          |
|                                       |              |          |          | Calculated QY (%)                   | 33.22                  |          |          |

## Decay Lifetime Measurement of Ir(III) complex 1

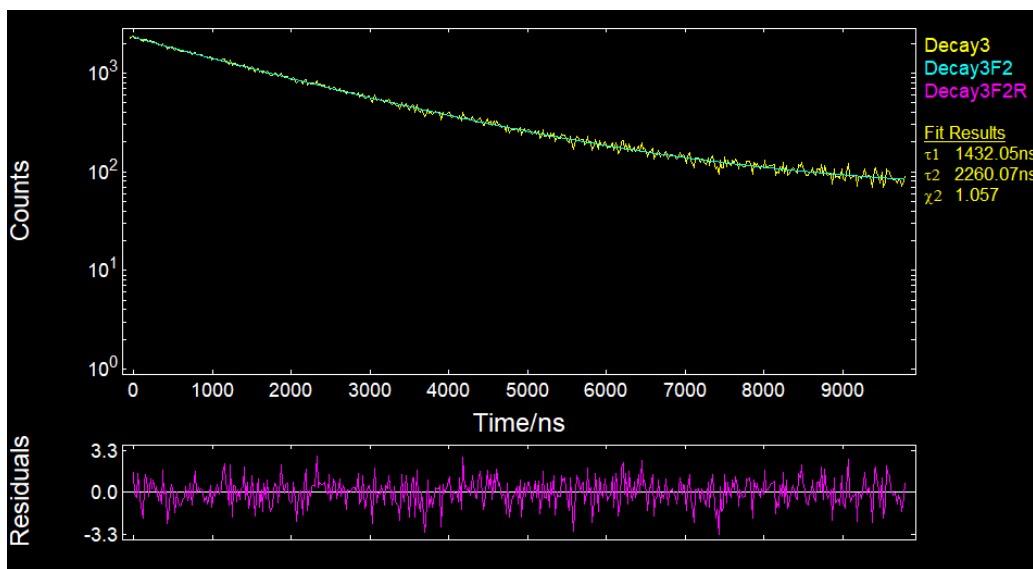

**Figure S42.** Biexponential lifetime decay of Ir(III) complex 1,  $\sim 1 \cdot 10^{-5}$  M (Absorbance of 0.065 from UV-Vis) in  $\text{CHCl}_3$  degassed for 20 mins (Ar) at 298 K after excitation at 365 nm. Data collected at  $\lambda_{\text{max}} = 470$  nm.

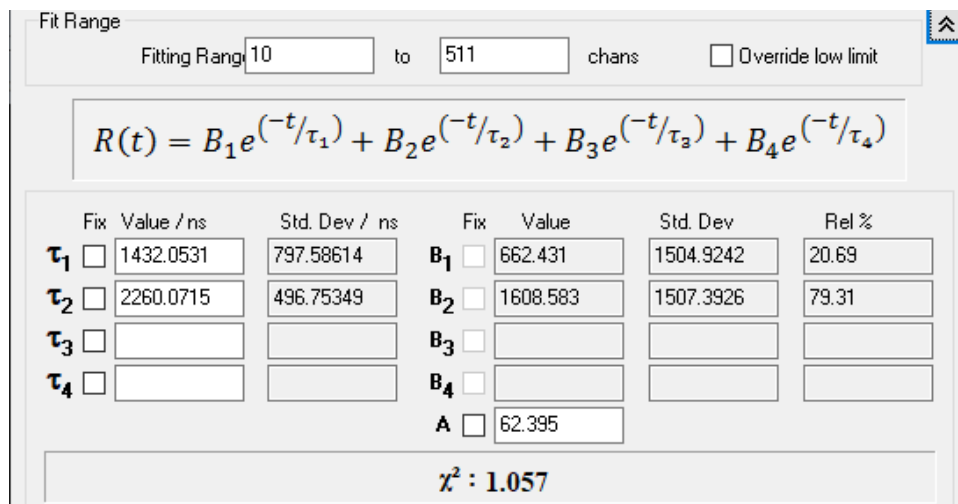

**Figure S43.** Fit result of Ir(III) complex 1,  $\sim 1 \cdot 10^{-5}$  M (Absorbance of 0.065 from UV-Vis) in  $\text{CHCl}_3$  degassed for 20 mins (Ar) at 298 K after excitation at 365 nm. Data collected at  $\lambda_{\text{max}} = 470$  nm.



## Decay Lifetime Measurement of Ir(III) complex 2

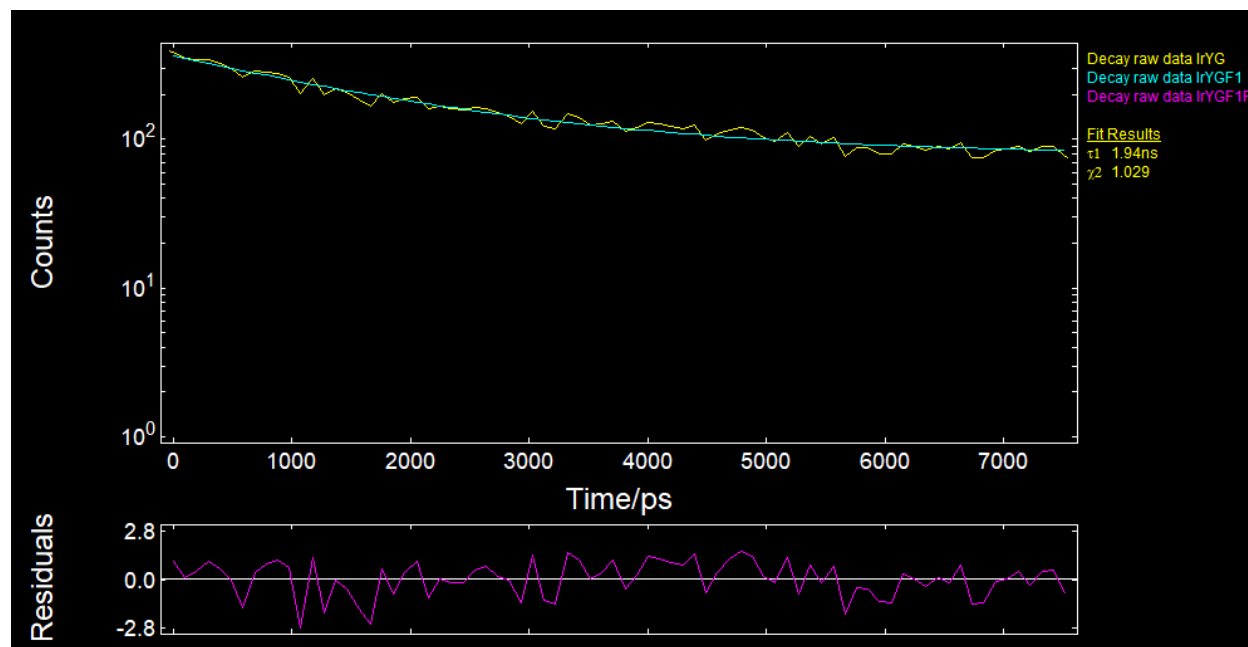

**Figure S44.** Monoexponential lifetime decay of Ir(III) complex **2**,  $\sim 1 \cdot 10^{-5}$  M (Absorbance of 0.081 from UV-Vis) in  $\text{CHCl}_3$  degassed for 20 mins (Ar) at 298 K after excitation at 365 nm. Data collected at  $\lambda_{\text{max}} = 540$  nm.

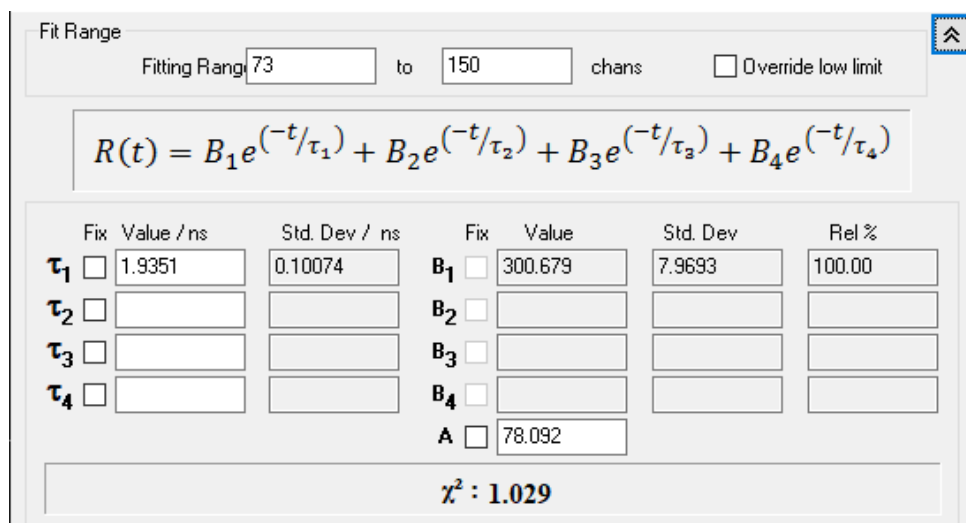

**Figure S45.** Fit result of Ir(III) complex **2**,  $\sim 1 \cdot 10^{-5}$  M (Absorbance of 0.081 from UV-Vis) in  $\text{CHCl}_3$  degassed for 20 mins (Ar) at 298 K after excitation at 365 nm. Data collected at  $\lambda_{\text{max}} = 540$  nm.

## Decay Lifetime Measurement of Ir(III) complex 3

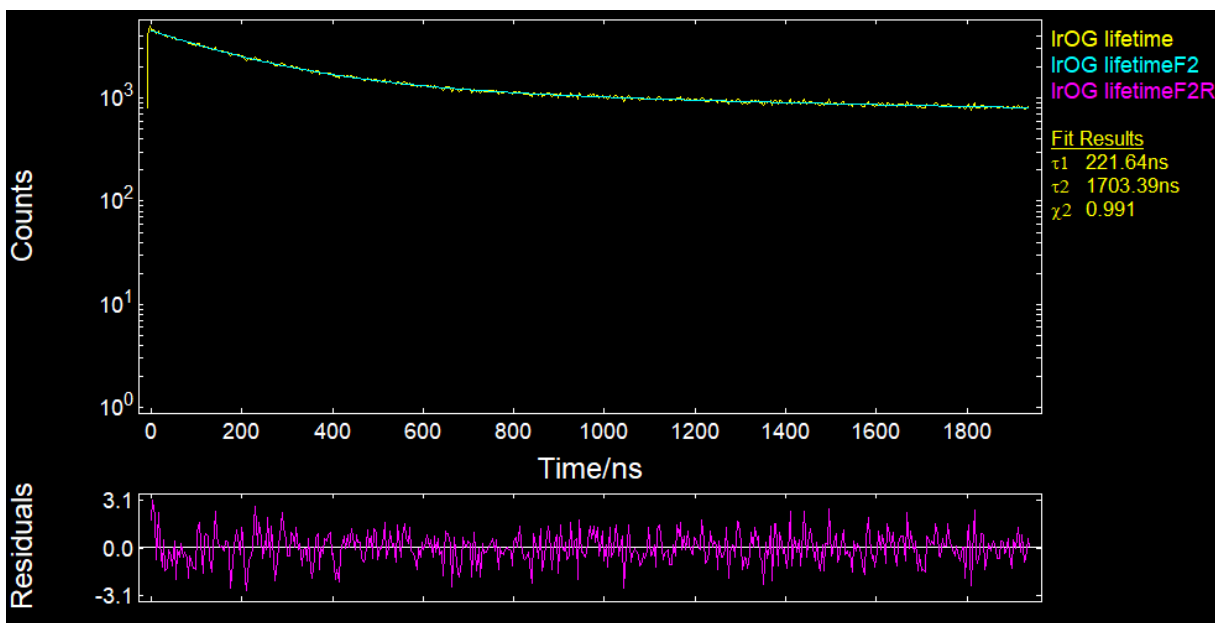

**Figure S46.** Biexponential lifetime decay of Ir(III) complex **3**,  $\sim 1 \cdot 10^{-6}$  M (Absorbance of 0.079 from UV-Vis) in  $\text{CHCl}_3$  degassed for 20 mins (Ar) at 298 K after excitation at 365 nm. Data collected at  $\lambda_{\text{max}} = 570$  nm.

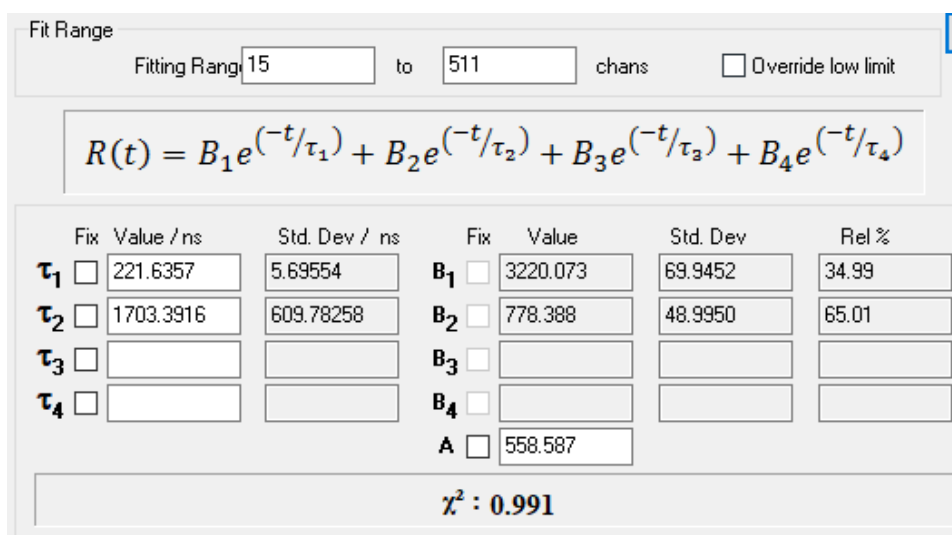

**Figure S47.** Fit result of Ir(III) complex **3**,  $\sim 1 \cdot 10^{-6}$  M (Absorbance of 0.079 from UV-Vis) in  $\text{CHCl}_3$  degassed for 20 mins (Ar) at 298 K after excitation at 365 nm. Data collected at  $\lambda_{\text{max}} = 570$  nm.

## Decay Lifetime Measurement of Ir(III) complex 4

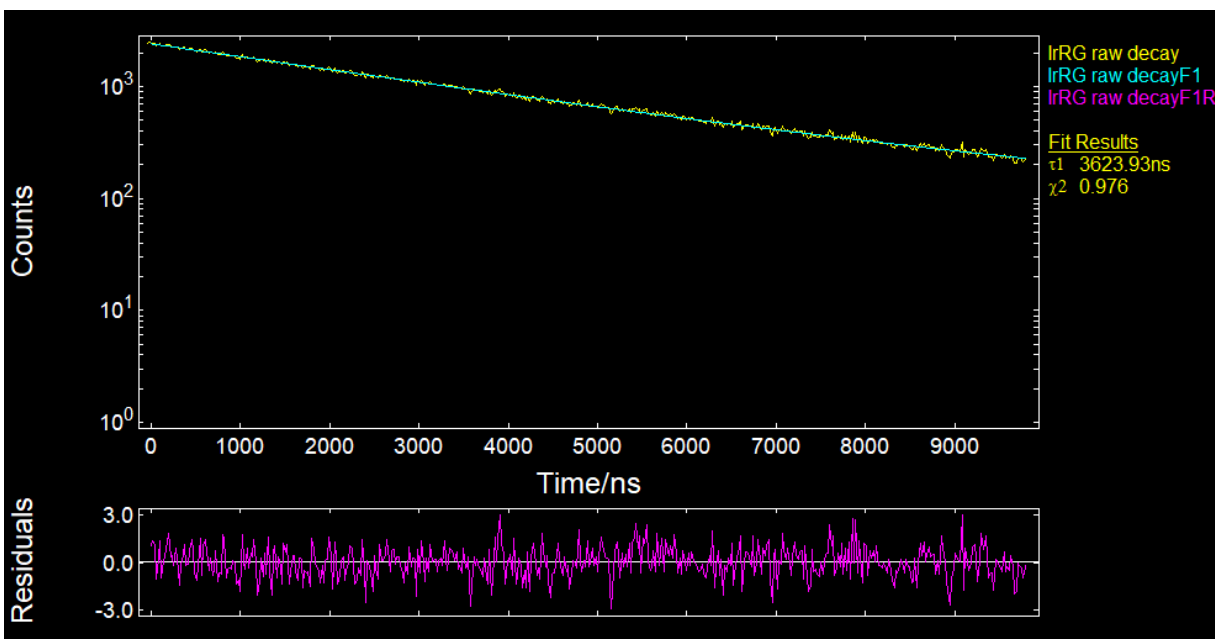

**Figure S48.** Monoexponential lifetime decay of Ir(III) complex 4,  $\sim 1 \cdot 10^{-6}$  M (Absorbance of 0.076 from UV-Vis) in  $\text{CHCl}_3$  degassed for 20 mins (Ar) at 298 K after excitation at 365 nm. Data collected at  $\lambda_{\text{max}} = 590$  nm.

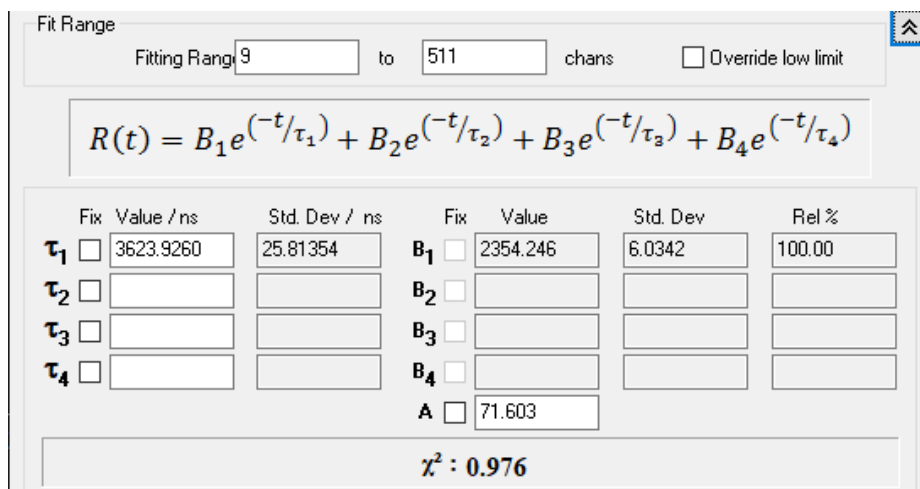

**Figure S49.** Fit result of Ir(III) complex 4,  $\sim 1 \cdot 10^{-6}$  M (Absorbance of 0.076 from UV-Vis) in  $\text{CHCl}_3$  degassed for 20 mins (Ar) at 298 K after excitation at 365 nm. Data collected at  $\lambda_{\text{max}} = 590$  nm.

## Decay Lifetime Measurement of Ir(III) complex 1•5

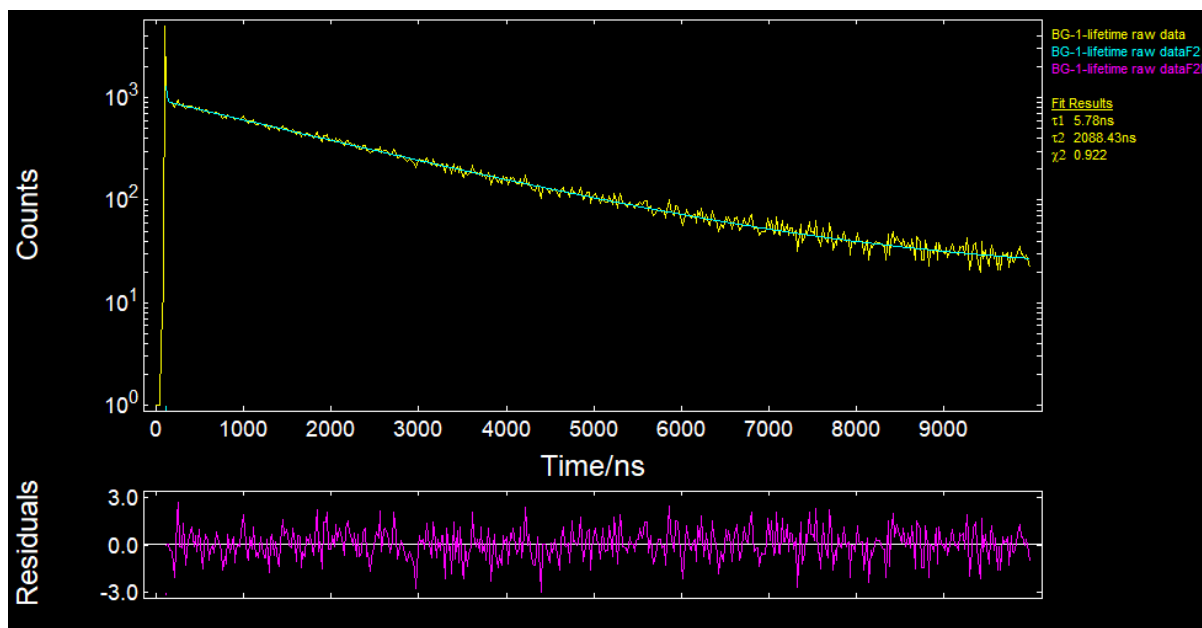

**Figure S50.** Biexponential lifetime decay of Ir(III) complex **1•5**, (1:1)  $\sim 1 \cdot 10^{-5}$  M (Absorbance of 0.071 from UV-Vis) in  $\text{CHCl}_3$  degassed for 20 mins (Ar) at 298 K after excitation at 365 nm. Data collected at  $\lambda_{\text{max}} = 470$  nm.

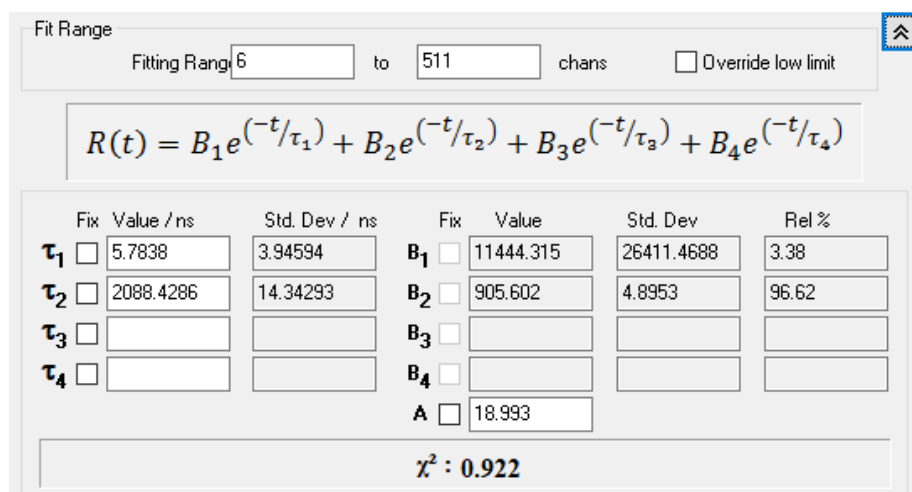

**Figure S51.** Fit result of Ir(III) complex **1•5**, (1:1)  $\sim 1 \cdot 10^{-5}$  M (Absorbance of 0.071 from UV-Vis) in  $\text{CHCl}_3$  degassed for 20 mins (Ar) at 298 K after excitation at 365 nm. Data collected at  $\lambda_{\text{max}} = 470$  nm.

## Decay Lifetime Measurement of Ir(III) complex **2•5**

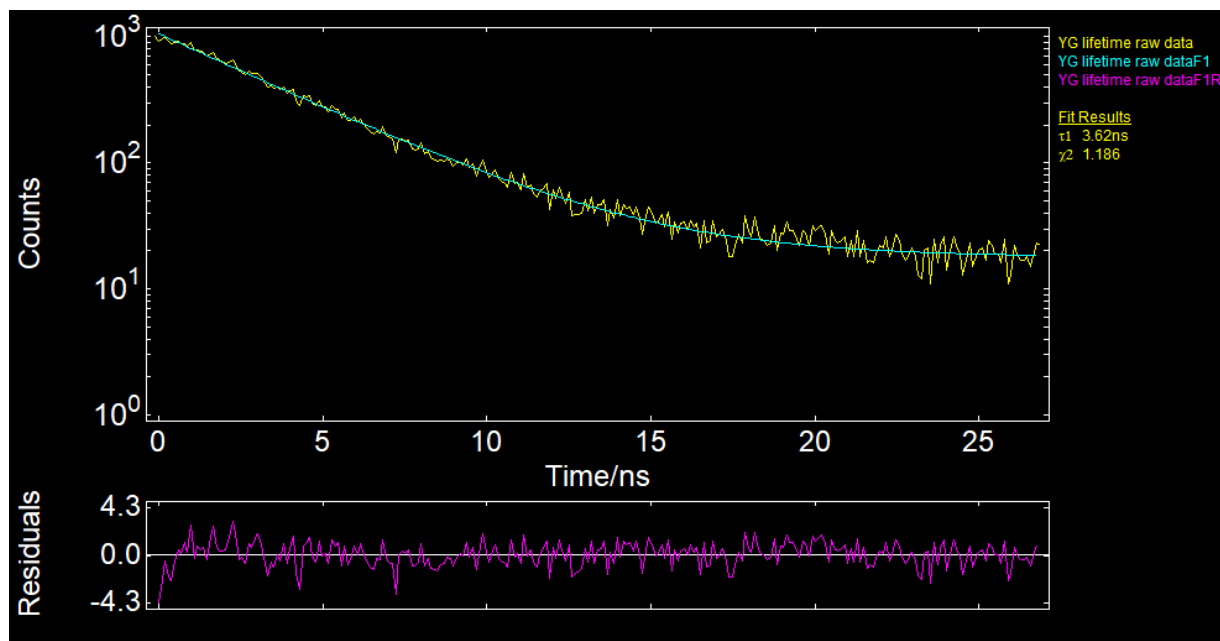

**Figure S52.** Monoexponential lifetime decay of Ir(III) complex **2•5**, (1:1)  $\sim 1 \cdot 10^{-5}$  M (Absorbance of 0.085 from UV-Vis) in  $\text{CHCl}_3$  degassed for 20 mins (Ar) at 298 K after excitation at 365 nm. Data collected at  $\lambda_{\text{max}} = 540$  nm.

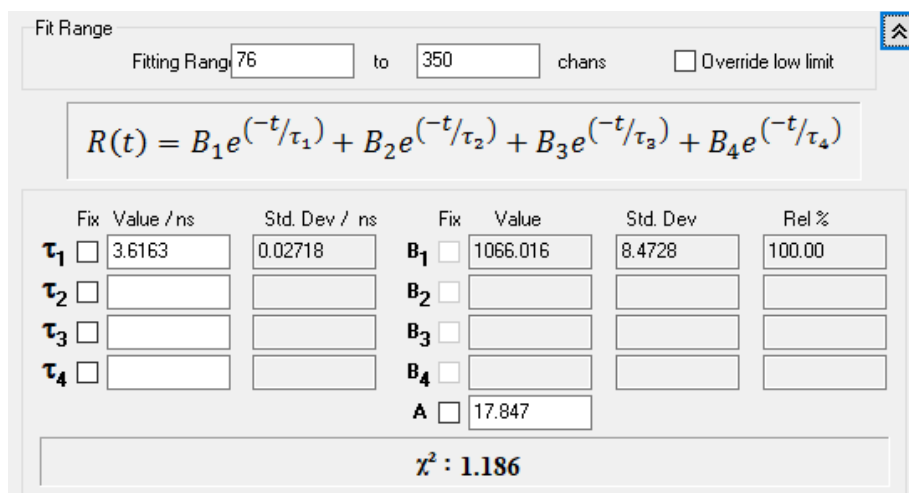

**Figure S53.** Fit result of Ir(III) complex **2•5**, (1:1)  $\sim 1 \cdot 10^{-5}$  M (Absorbance of 0.085 from UV-Vis) in  $\text{CHCl}_3$  degassed for 20 mins (Ar) at 298 K after excitation at 365 nm. Data collected at  $\lambda_{\text{max}} = 540$  nm.

## Decay Lifetime Measurement of Ir(III) complex 3•5

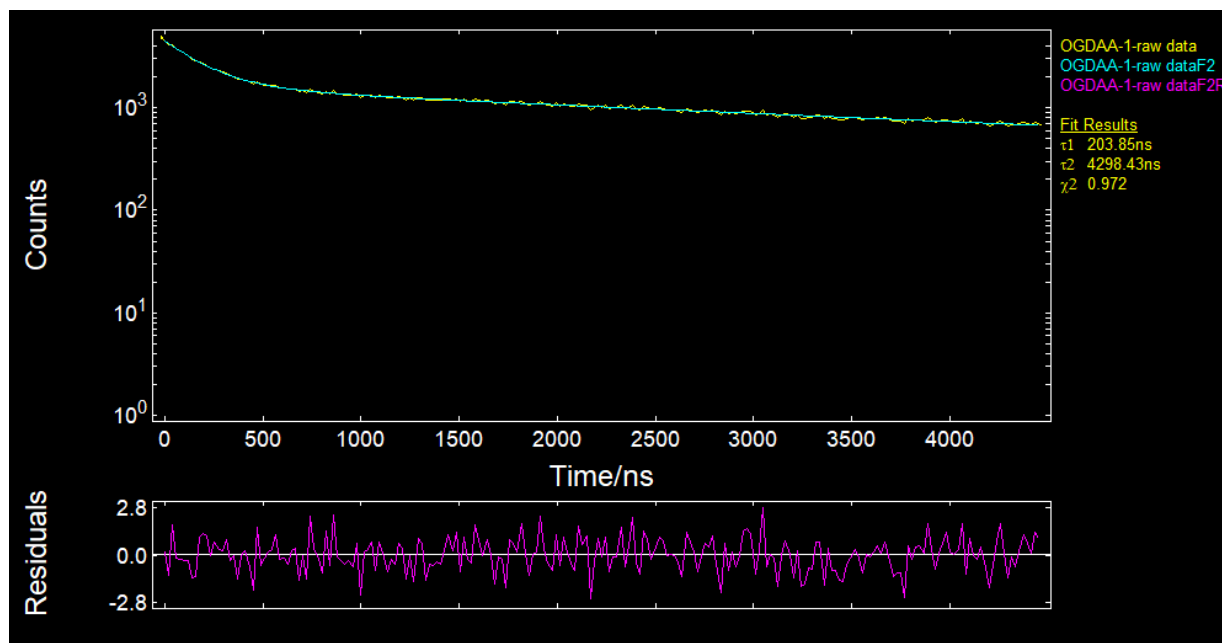

**Figure S54.** Biexponential lifetime decay of Ir(III) complex **3•5**, (1:1)  $\sim 1 \cdot 10^{-6}$  M (Absorbance of 0.080 from UV-Vis) in  $\text{CHCl}_3$  degassed for 20 mins (Ar) at 298 K after excitation at 365 nm. Data collected at  $\lambda_{\text{max}} = 570$  nm.

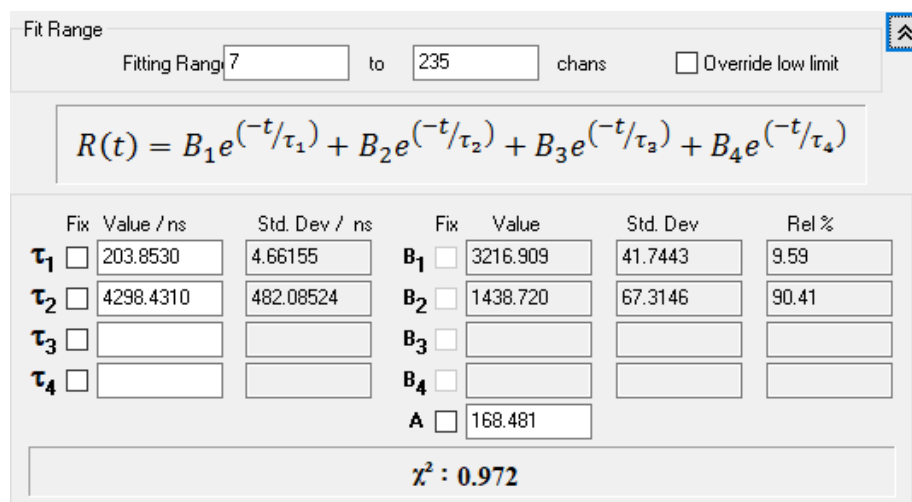

**Figure S55.** Fit result of Ir(III) complex **3•5**, (1:1)  $\sim 1 \cdot 10^{-6}$  M (Absorbance of 0.080 from UV-Vis) in  $\text{CHCl}_3$  degassed for 20 mins (Ar) at 298 K after excitation at 365 nm. Data collected at  $\lambda_{\text{max}} = 570$  nm.

## Decay Lifetime Measurement of Ir(III) complex 4•5

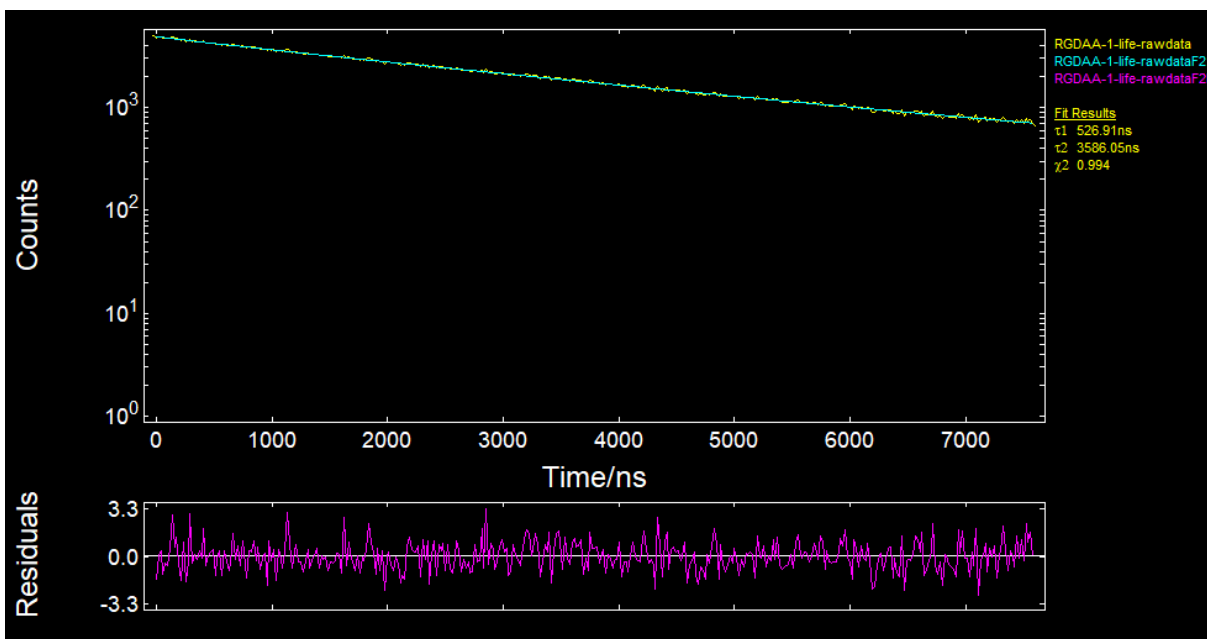

**Figure S56.** Biexponential lifetime decay of Ir(III) complex **4•5**, (1:1)  $\sim 1 \cdot 10^{-6}$  M (Absorbance of 0.085 from UV-Vis) in  $\text{CHCl}_3$  degassed for 20 mins (Ar) at 298 K after excitation at 365 nm. Data collected at  $\lambda_{\text{max}} = 590$  nm.

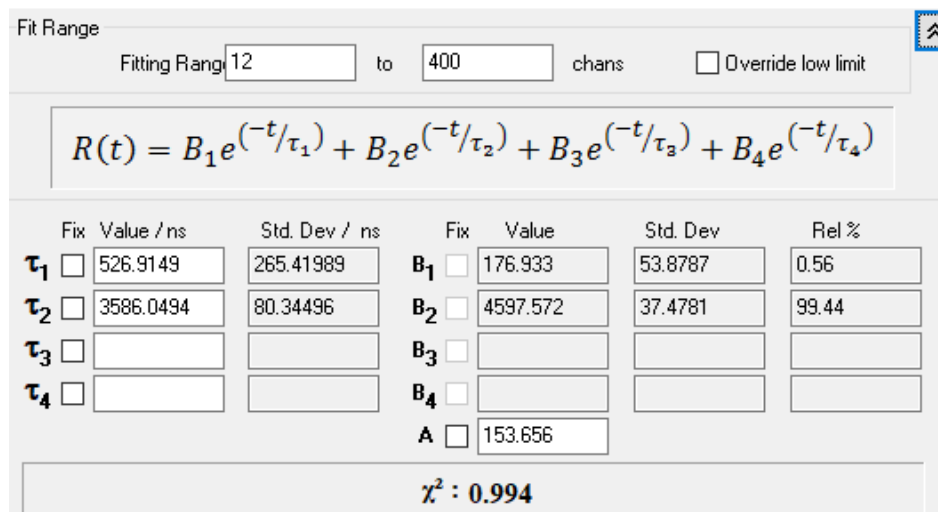

**Figure S57.** Fit result of Ir(III) complex **4•5**, (1:1)  $\sim 1 \cdot 10^{-6}$  M (Absorbance of 0.085 from UV-Vis) in  $\text{CHCl}_3$  degassed for 20 mins (Ar) at 298 K after excitation at 365 nm. Data collected at  $\lambda_{\text{max}} = 590$  nm.

## Decay Lifetime Measurement of Ir(III) complex 2•5 (white light)

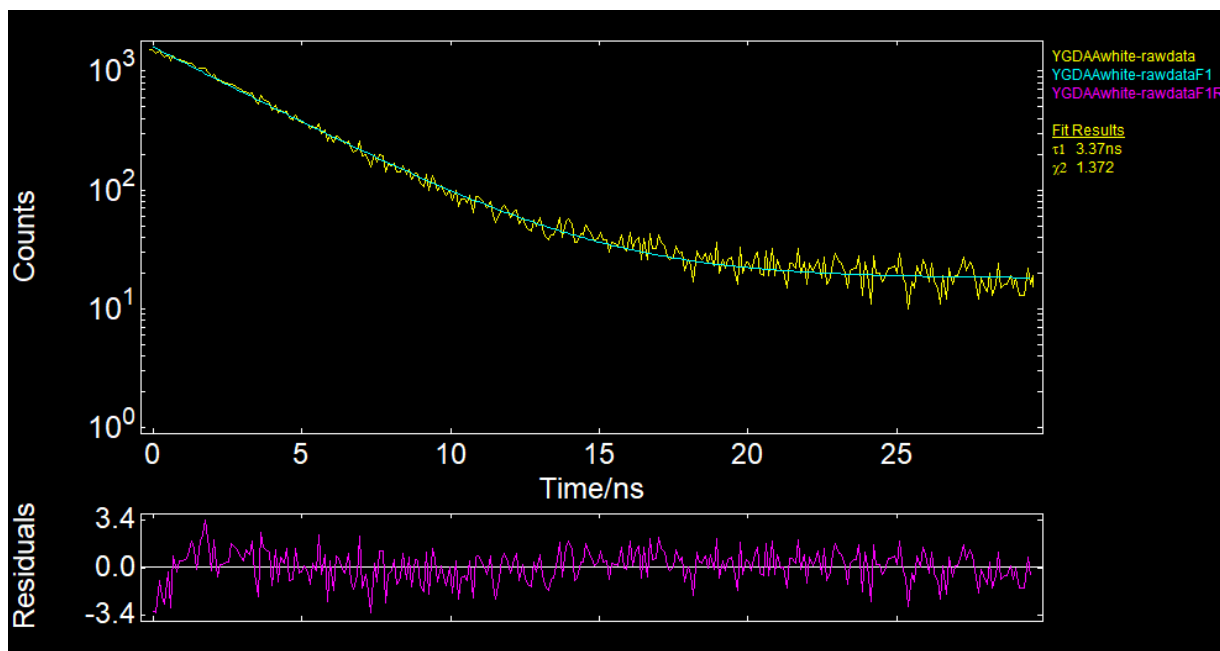

**Figure S58.** Monoexponential lifetime decay of Ir(III) complex 2•5, (1:1.3)  $\sim 1 \cdot 10^{-5}$  M (Absorbance of 0.082 from UV-Vis) in  $\text{CHCl}_3$  degassed for 20 mins (Ar) at 298 K after excitation at 365 nm. Data collected at  $\lambda_{\text{max}} = 540$  nm.

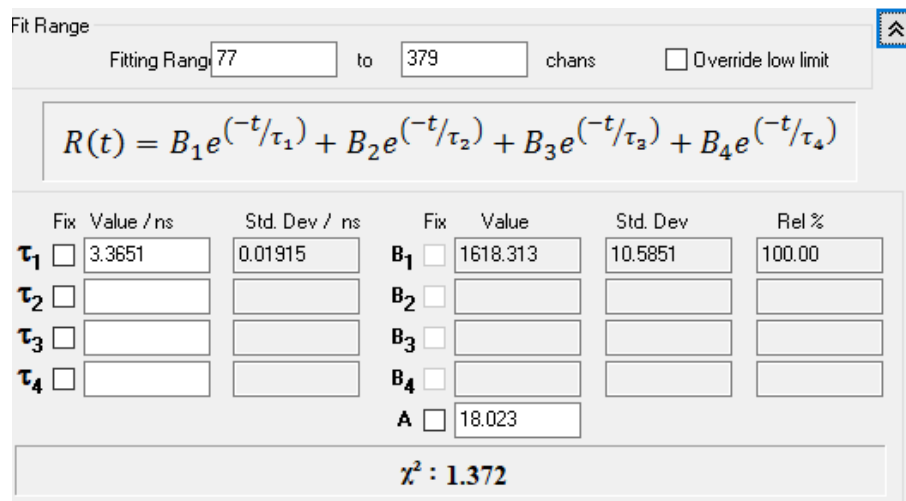

**Figure S59.** Fit result of Ir(III) complex 2•5, (1:1)  $\sim 1 \cdot 10^{-5}$  M (Absorbance of 0.082 from UV-Vis) in  $\text{CHCl}_3$  degassed for 20 mins (Ar) at 298 K after excitation at 365 nm. Data collected at  $\lambda_{\text{max}} = 540$  nm.



## S7. PMMA solid state PLQYs and decay lifetimes

**Table S12.** **a)** Significant excitation and emission peaks for Ir(III) complexes **1-4** in PMMA films at 298 K. **b)** PLQYs for Ir(III) complexes **1-4**; in PMMA film at 298 K determined using an SC-30 integrating sphere module. **c)** decay lifetimes using TCSPC excited at 365 nm and their corresponding chi-squared values for Ir(III) complexes **1-4**; in PMMA films at 298 K. Complexes **1, 2, 3,** and **4** decay biexponentially. **d)** the radiative ( $k_r$ ) and nonradiative ( $k_{nr}$ ) rate constants were calculated as  $k_r = \phi_{PL}/\tau_{PL}$  and  $k_{nr} = (1-\phi_{PL})/\tau_{PL}$ .

| Ir(III)<br>Complex | Excitation<br>(nm) <sup>a</sup> | Emission<br>(nm) <sup>a</sup> | PLQY<br>(%) <sup>b</sup> | Lifetime (ns)<br>( $\tau_{PL}$ , $\chi^2$ ) <sup>c</sup> | $k_r$<br>( $\times 10^5 \text{ s}^{-1}$ ) <sup>d</sup> | $k_{nr}$<br>( $\times 10^5 \text{ s}^{-1}$ ) <sup>d</sup> |
|--------------------|---------------------------------|-------------------------------|--------------------------|----------------------------------------------------------|--------------------------------------------------------|-----------------------------------------------------------|
| <b>1</b>           | 250, 295                        | 473, 495                      | 91.3                     | (1932.14, 0.959) 92%                                     | 4.73                                                   | 0.45                                                      |
| <b>2</b>           | 302, 328                        | 540, 581                      | 15.1                     | (0.5778, 1.199) 71.5%                                    | 2613.36                                                | 14693.67                                                  |
| <b>3</b>           | 298, 390                        | 565, 597                      | 70.1                     | (1155.79, 1.092) 95%                                     | 6.07                                                   | 2.59                                                      |
| <b>4</b>           | 342, 440                        | 595, 634                      | 74.0                     | (3830.21, 0.979) 95%                                     | 1.93                                                   | 0.68                                                      |
| <b>1•5 (1:1)</b>   | 261, 329                        | 473, 497                      | 83.4                     | (2079.96, 1.113) 86%                                     | 4.01                                                   | 0.80                                                      |
| <b>2•5 (1:1)</b>   | 326, 456                        | 537, 581                      | 15.7                     | (3.2596, 1.114) 51%                                      | 481.65                                                 | 2586.21                                                   |
| <b>3•5 (1:1)</b>   | 299, 388                        | 561, 599                      | 65.1                     | (4042.90, 1.079) 90%                                     | 1.61                                                   | 0.86                                                      |
| <b>4•5 (1:1)</b>   | 340, 440                        | 595, 693                      | 71.3                     | (4177.25, 0.989) 80%                                     | 1.71                                                   | 0.69                                                      |

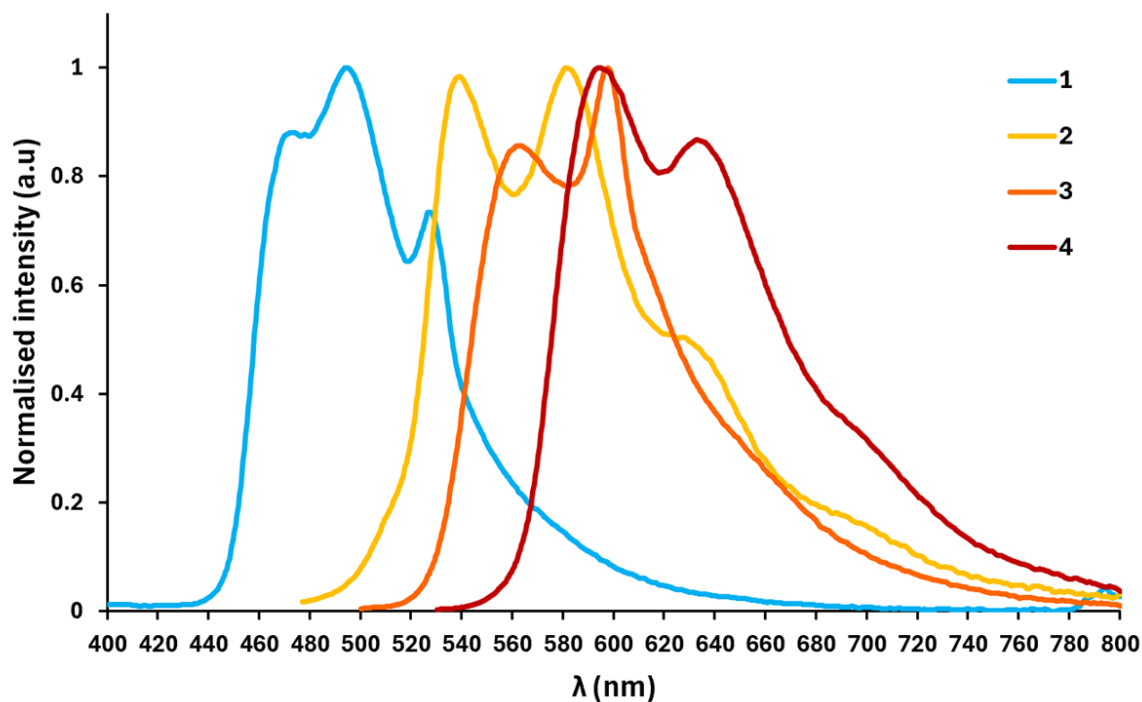

**Figure S60.** Combined normalised emission spectra of complex 1-4 obtained through solid state excitation of PMMA thin films.

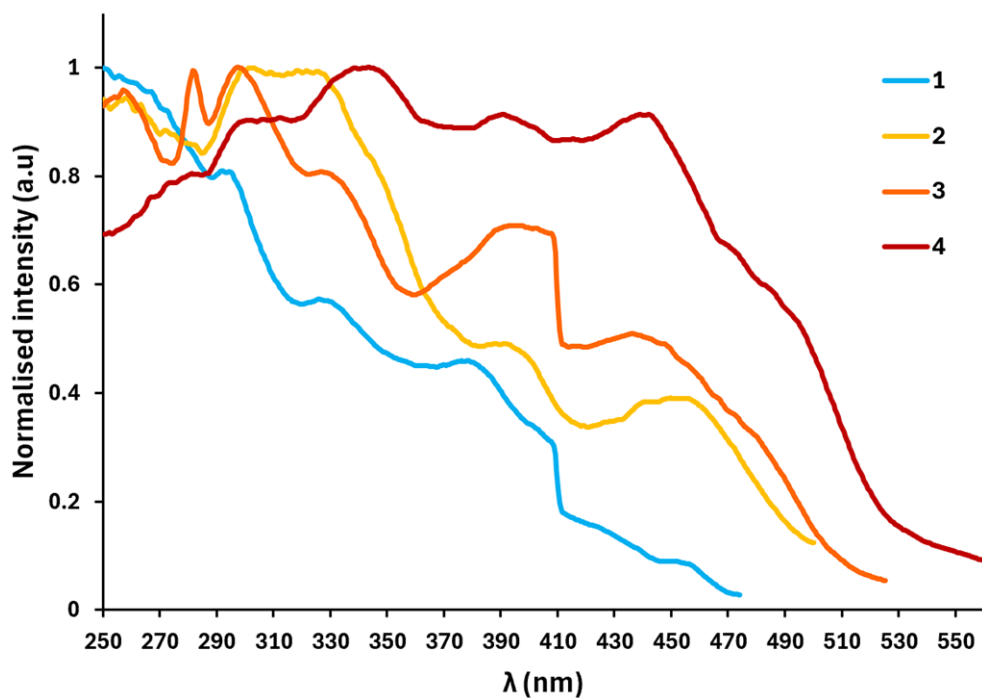

**Figure S61.** Combined normalised absorption spectra of complex 1-4 obtained through solid state analysis of PMMA thin films.

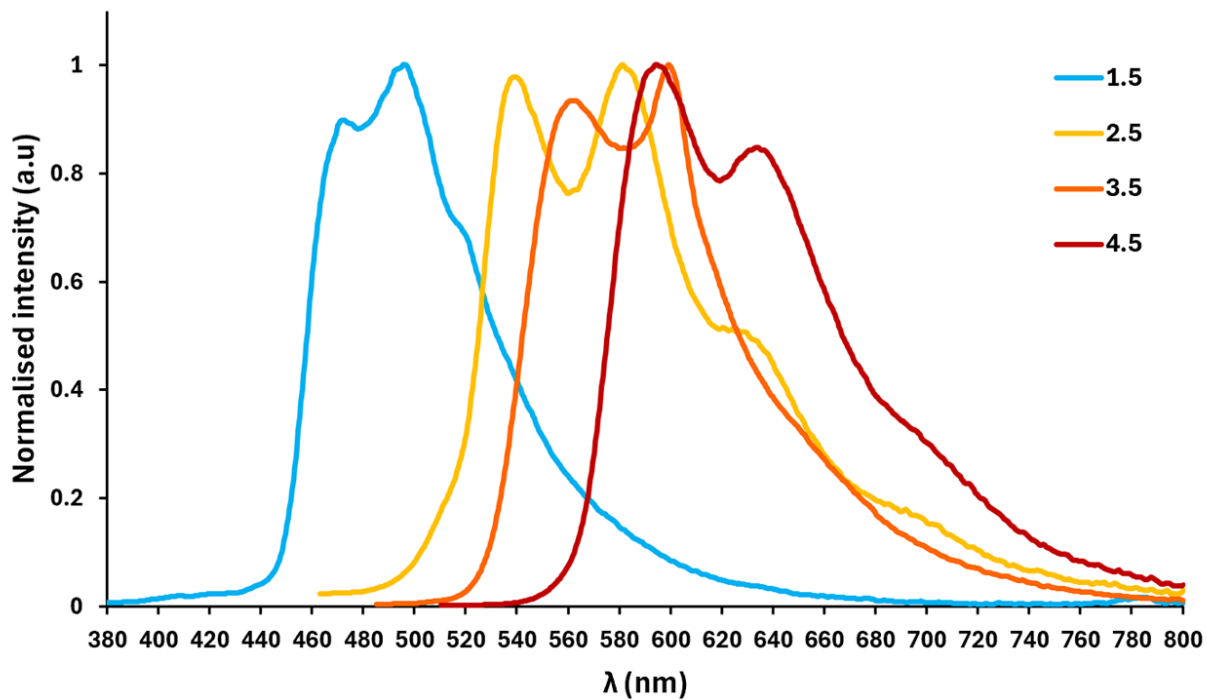

**Figure S62.** Combined normalised emission spectra of co-complex **1-4•5** obtained through solid state excitation of PMMA thin films.

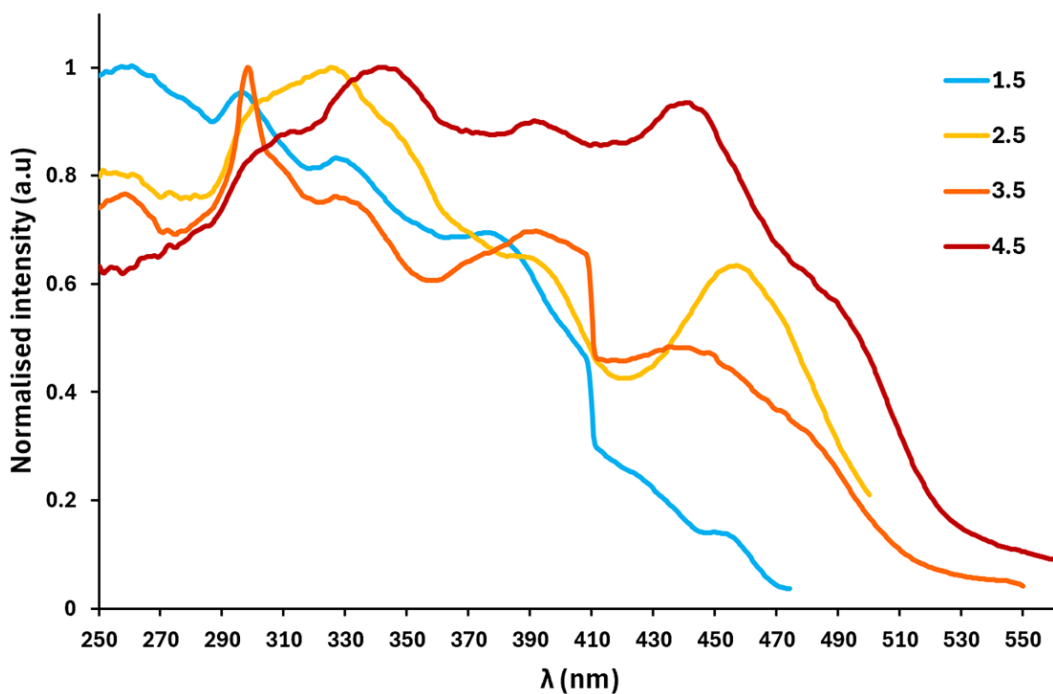

**Figure S63.** Combined normalised absorption spectra of co-complex **1-4•5** obtained through solid state analysis of PMMA thin films.

## Solid State Decay Lifetime Measurement of Ir(III) complex 1

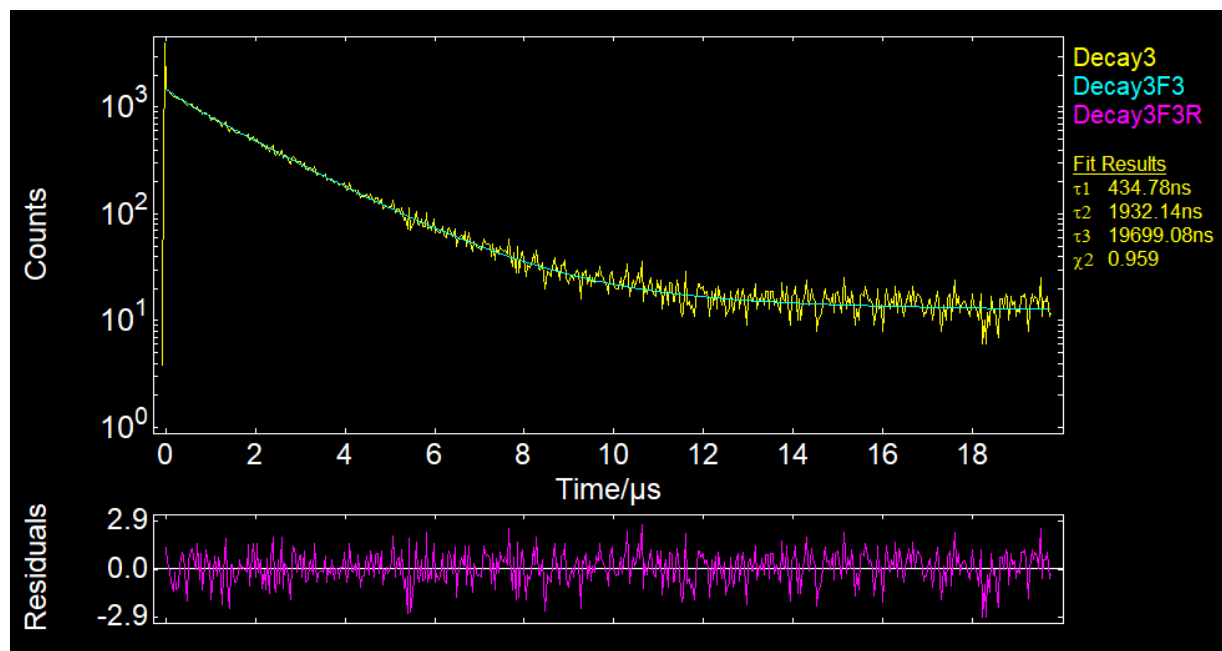

**Figure S64.** Biexponential lifetime decay of Ir(III) complex 1 in PMMA film at 298 K, excited at 365 nm. Data collected at  $\lambda_{\text{max}} = 495$  nm.

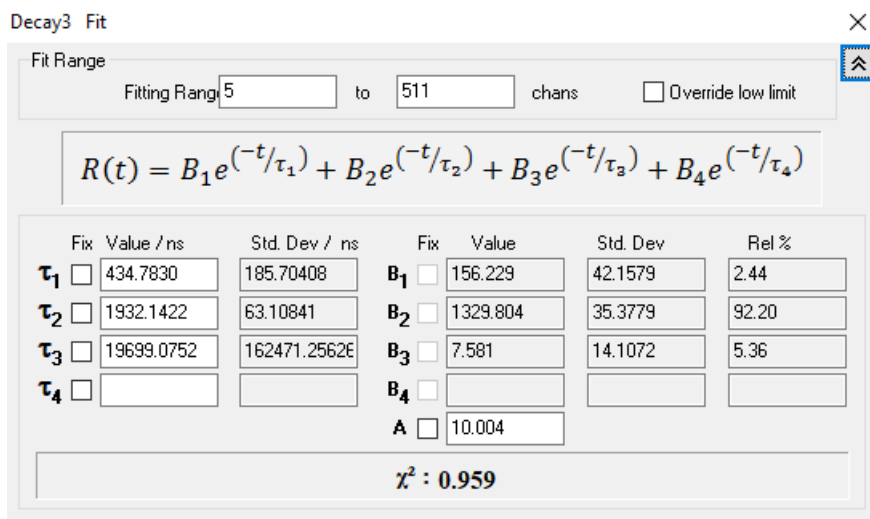

**Figure S65.** Fit result of Ir(III) complex 1 in PMMA film at 298 K, excited at 365 nm. Data collected at  $\lambda_{\text{max}} = 495$  nm.

## Solid State Decay Lifetime Measurement of Ir(III) complex 2

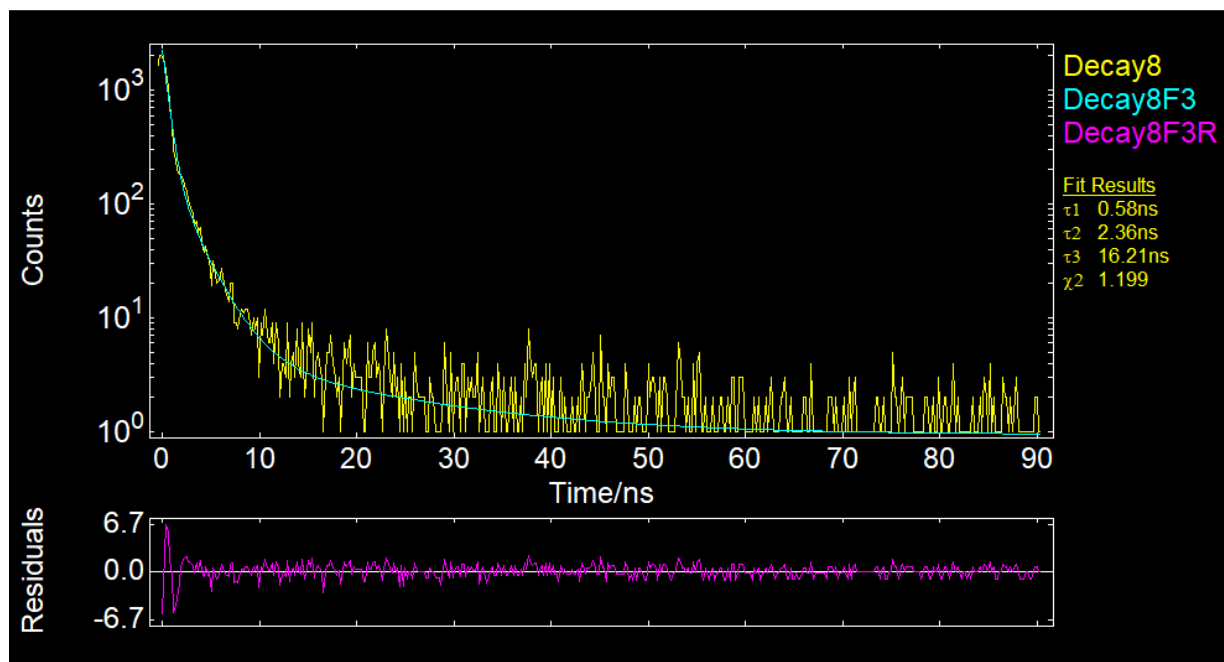

**Figure S66.** Biexponential lifetime decay of Ir(III) complex **2** in PMMA film at 298 K, excited at 365 nm. Data collected at  $\lambda_{\text{max}} = 580$  nm.

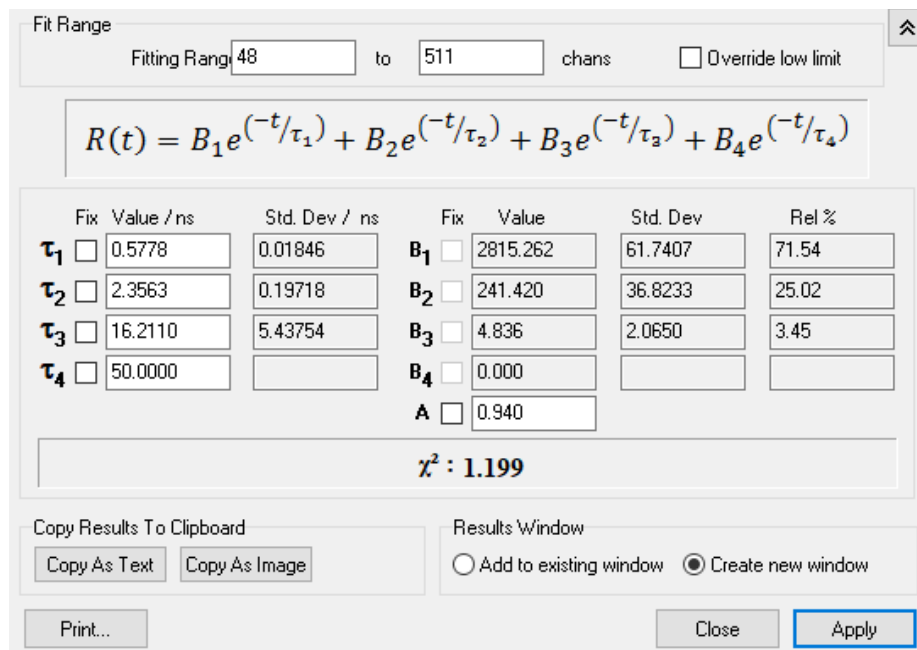

**Figure S67.** Fit result of Ir(III) co-system **2** in PMMA film at 298 K, excited at 365 nm. Data collected at  $\lambda_{\text{max}} = 580$  nm.

### Solid State Decay Lifetime Measurement of Ir(III) complex 3

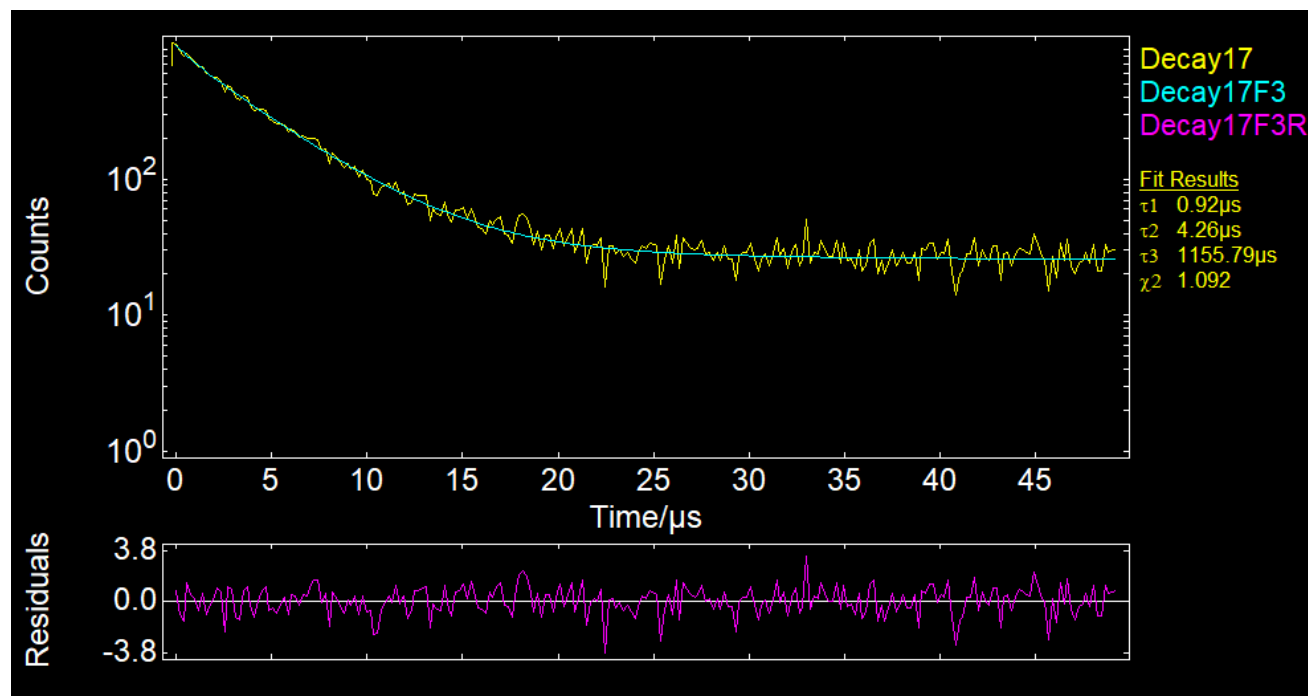

**Figure S68.** Biexponential lifetime decay of Ir(III) complex 3 in PMMA film at 298 K, excited at 365 nm. Data collected at  $\lambda_{\text{max}} = 598$  nm.

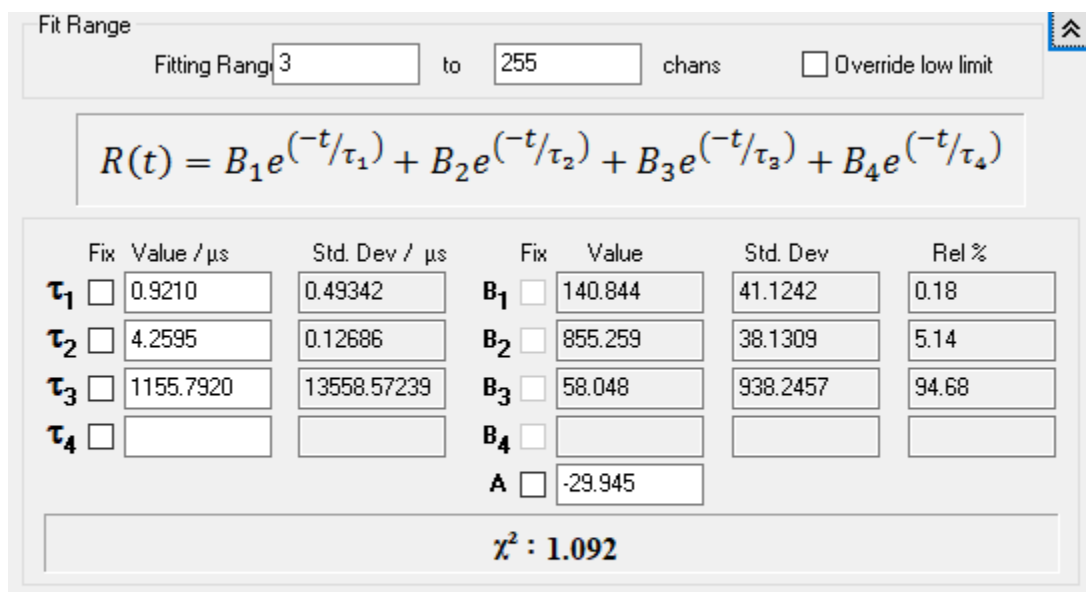

**Figure S69.** Fit result of Ir(III) co-system 3 in PMMA film at 298 K, excited at 365 nm. Data collected at  $\lambda_{\text{max}} = 598$  nm.

## Solid State Decay Lifetime Measurement of Ir(III) complex 4

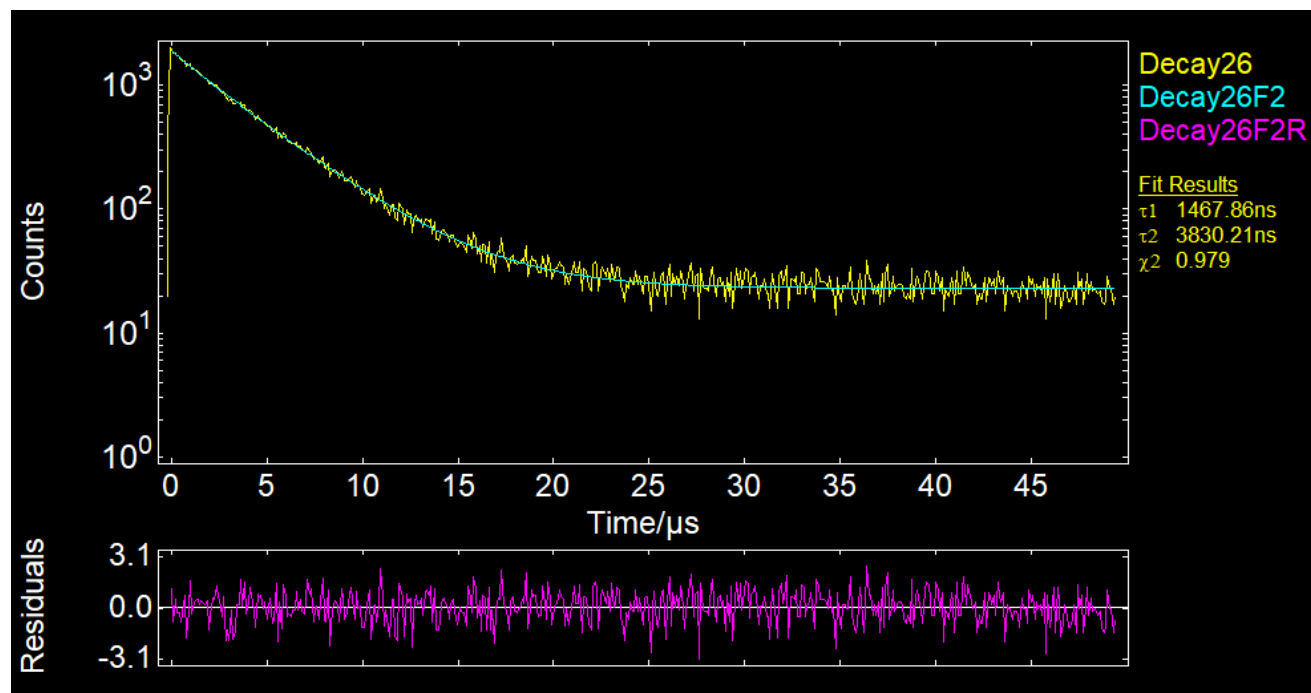

**Figure S70.** Biexponential lifetime decay of Ir(III) complex **4** in PMMA film at 298 K, excited at 365 nm. Data collected at  $\lambda_{\text{max}} = 595$  nm.

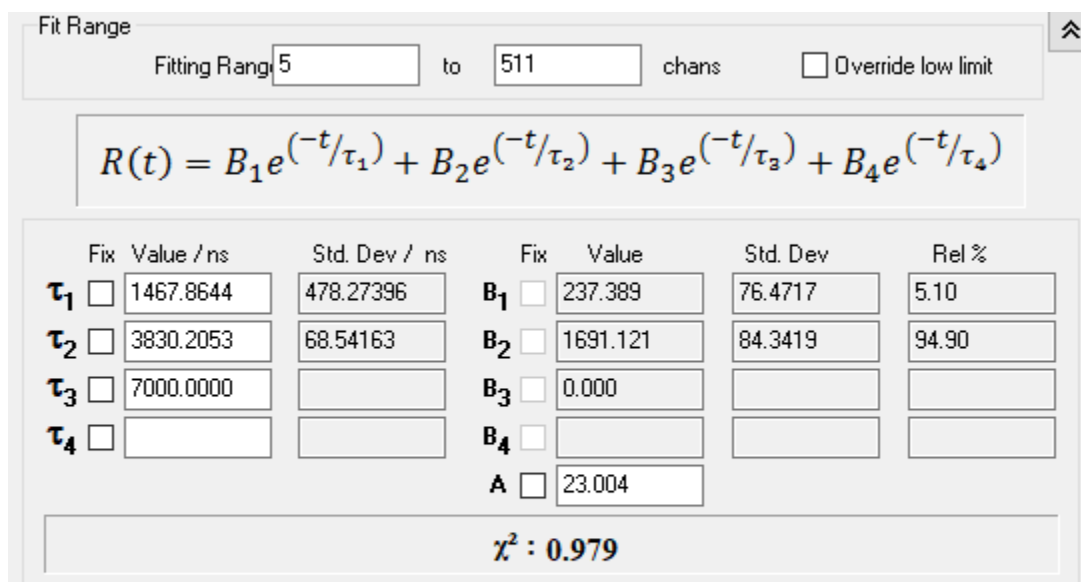

**Figure S71.** Fit result of Ir(III) co-system **4** in PMMA film at 298 K, excited at 365 nm. Data collected at  $\lambda_{\text{max}} = 595$  nm.

## Solid State Decay Lifetime Measurement of Ir(III) complex 1•5

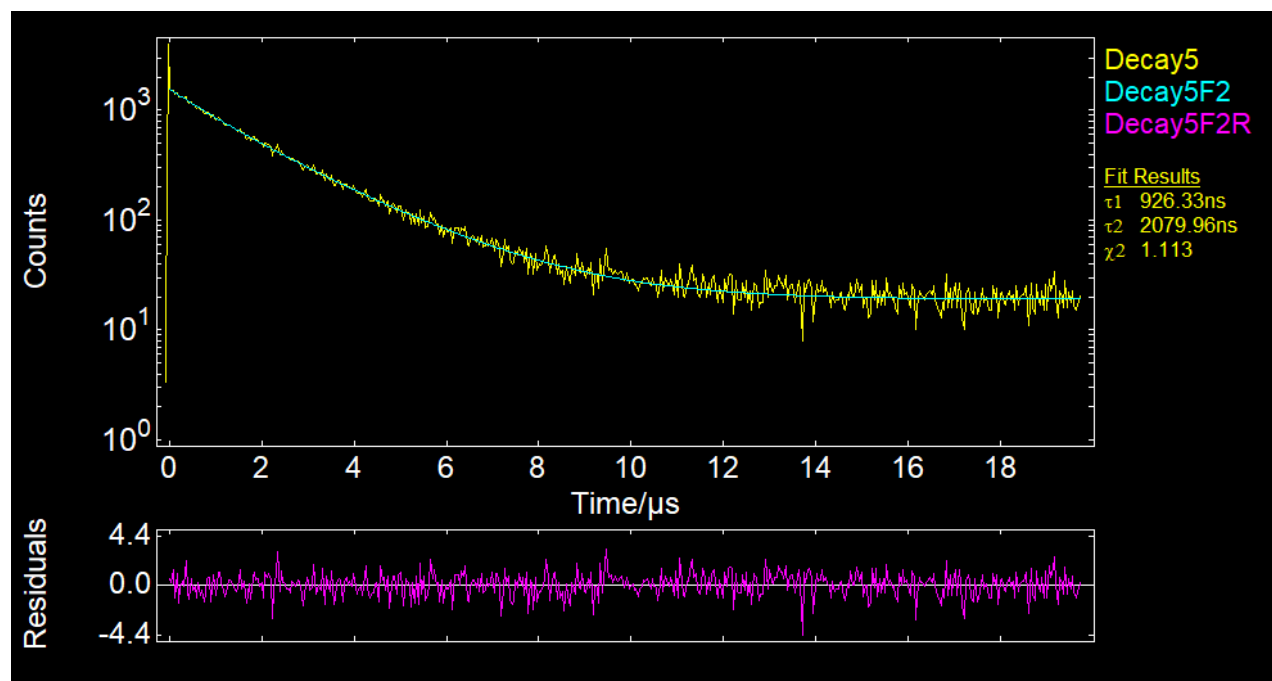

**Figure S72.** Biexponential lifetime decay of Ir(III) co-system **1•5** in PMMA film at 298 K, excited at 365 nm. Data collected at  $\lambda_{\max} = 496$  nm.

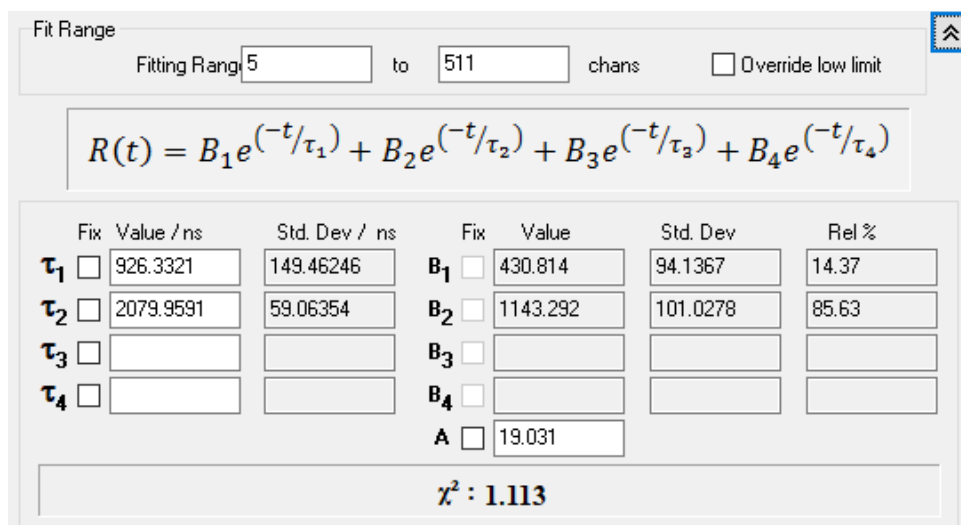

**Figure S73.** Fit result of Ir(III) co-system **1•5** in PMMA film at 298 K, excited at 365 nm. Data collected at  $\lambda_{\max} = 496$  nm.



## Solid State Decay Lifetime Measurement of Ir(III) complex 2•5

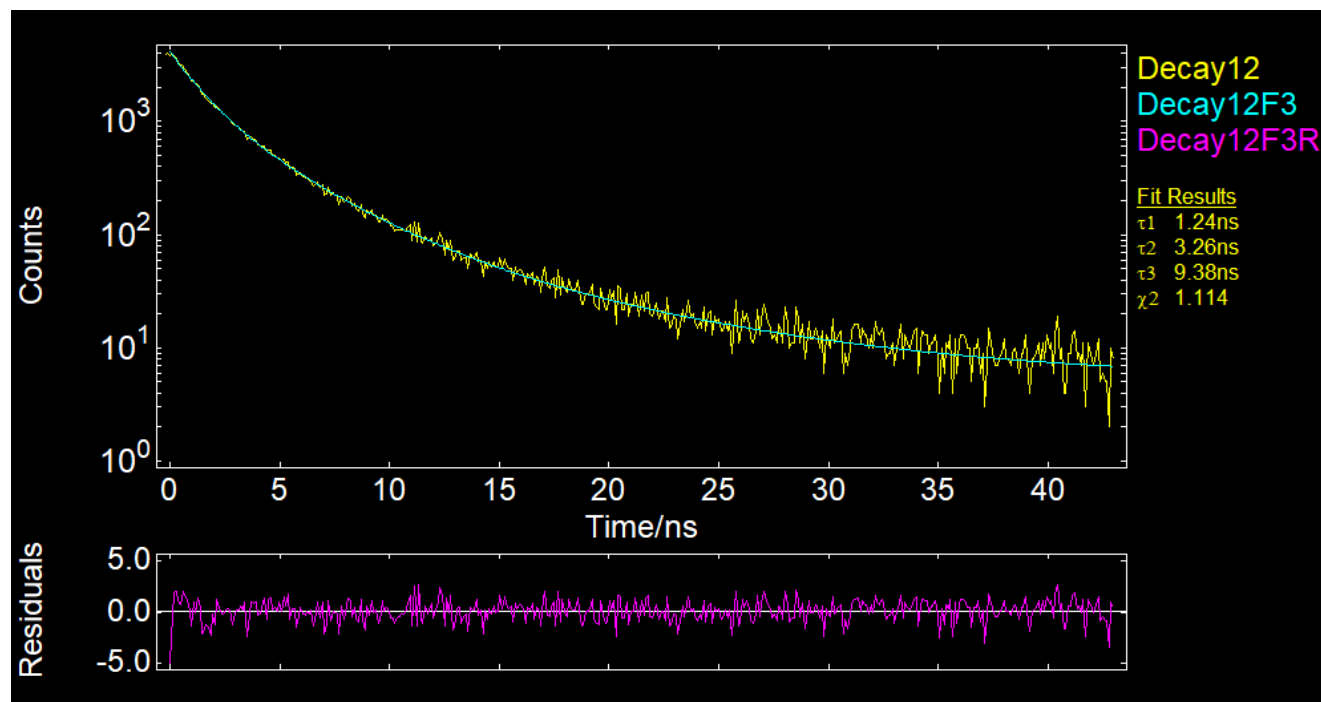

**Figure S74.** Biexponential lifetime decay of Ir(III) complex **2•5** in PMMA film at 298 K, excited at 365 nm. Data collected at  $\lambda_{\text{max}} = 581$  nm.

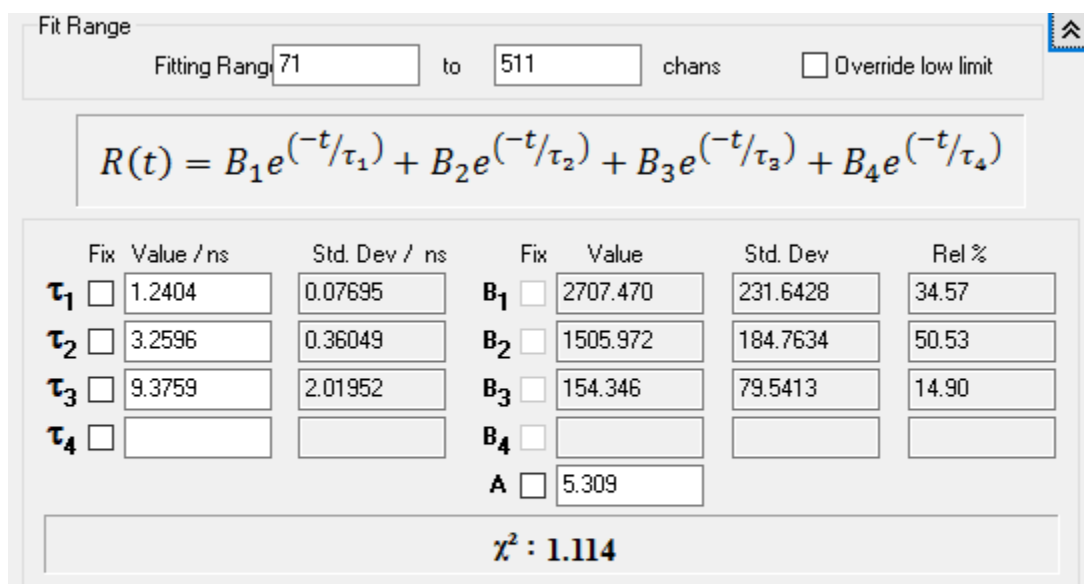

**Figure S75.** Fit result of Ir(III) co-system **2•5** in PMMA film at 298 K, excited at 365 nm. Data collected at  $\lambda_{\text{max}} = 581$  nm.

## Solid State Decay Lifetime Measurement of Ir(III) complex 3•5

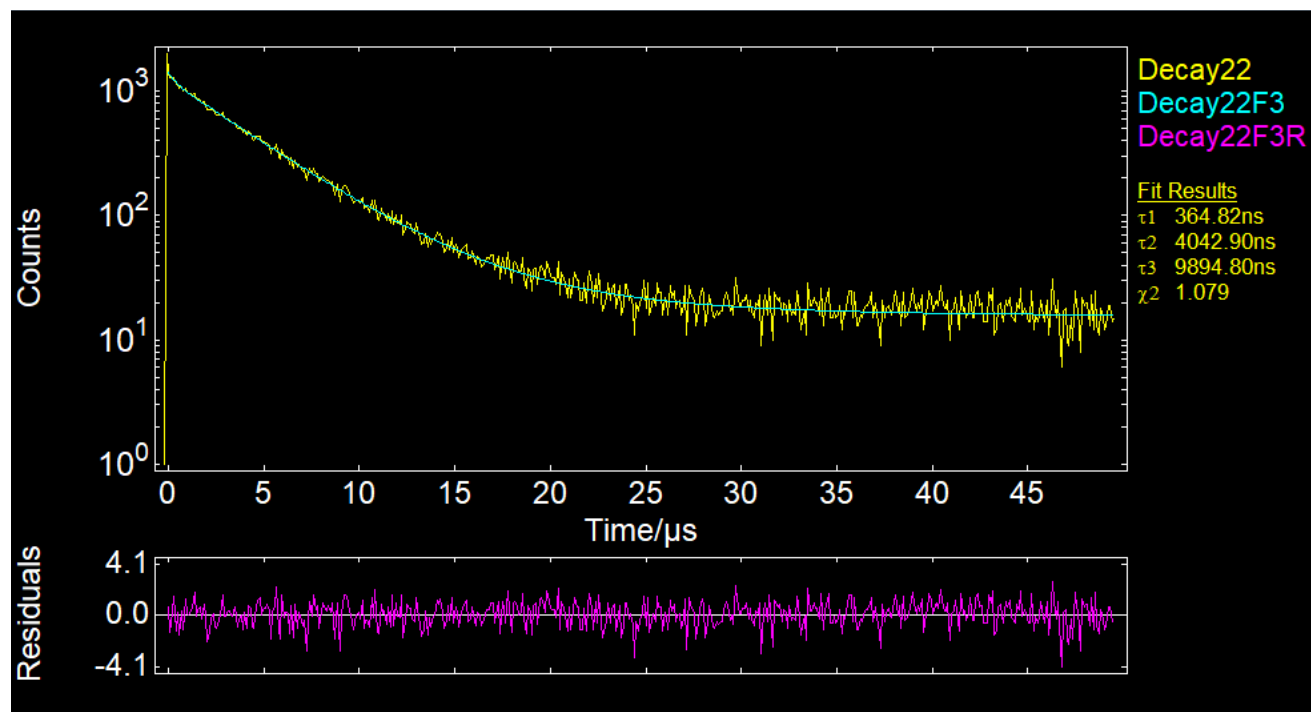

**Figure S76.** Biexponential lifetime decay of Ir(III) complex **3•5** in PMMA film at 298 K, excited at 365 nm. Data collected at  $\lambda_{\text{max}} = 599$  nm.

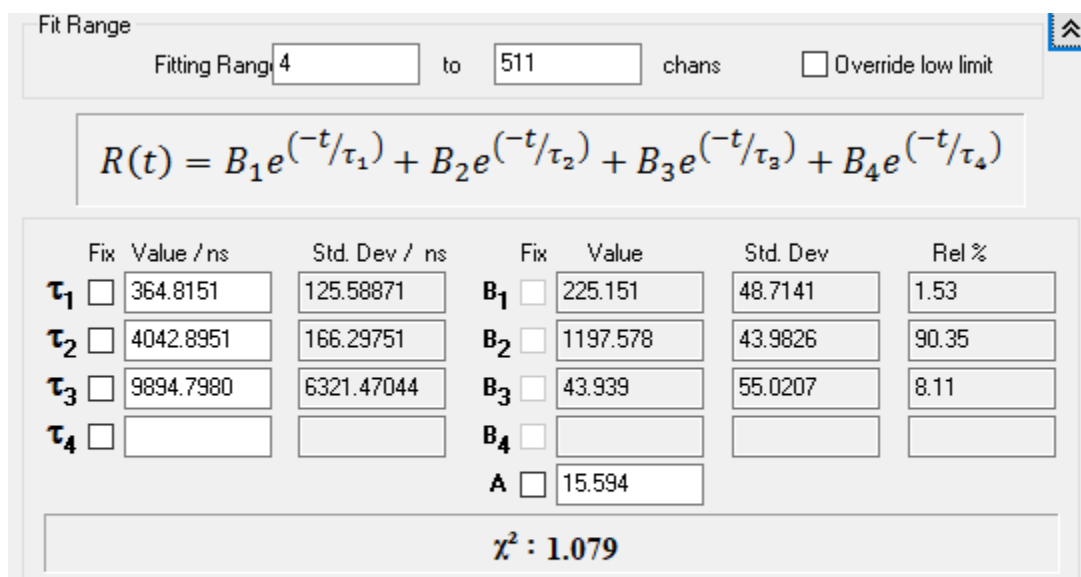

**Figure S77.** Fit result of Ir(III) co-system **3•5** in PMMA film at 298 K, excited at 365 nm.

Data collected at  $\lambda_{\text{max}} = 599$  nm.

## Solid State Decay Lifetime Measurement of Ir(III) complex 4•5

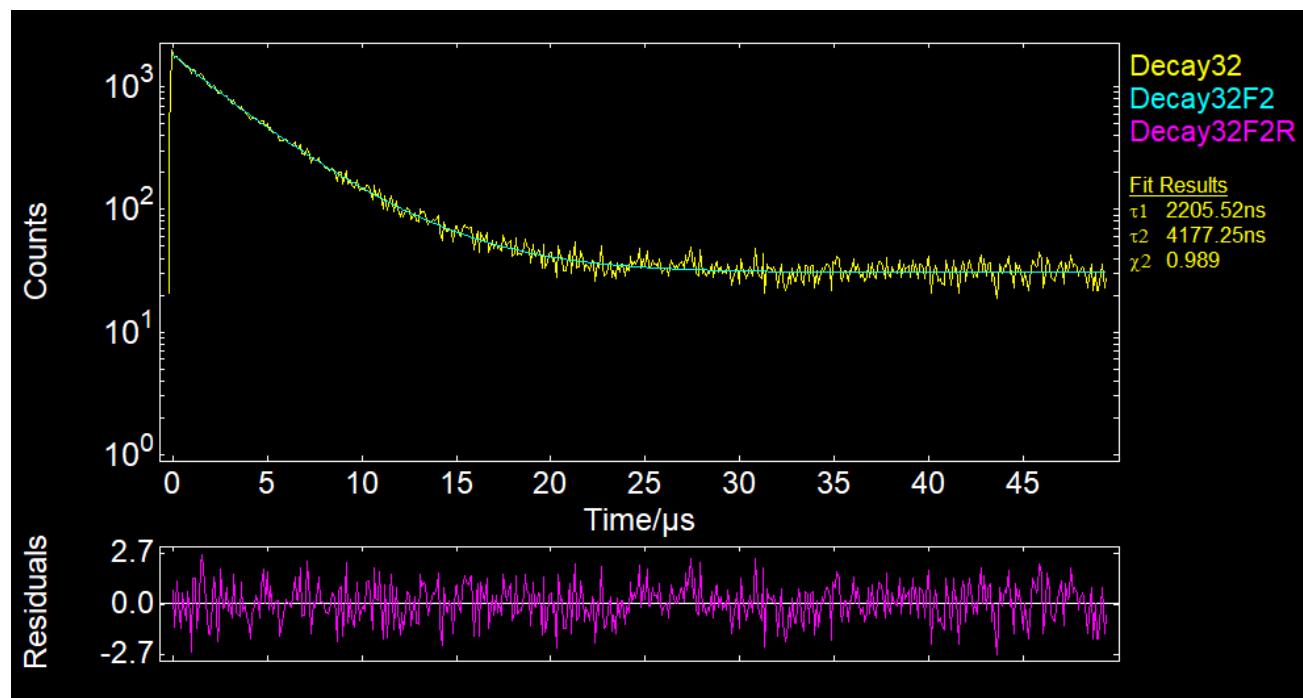

**Figure S78.** Biexponential lifetime decay of Ir(III) complex **4•5** in PMMA film at 298 K, excited at 365 nm. Data collected at  $\lambda_{\text{max}} = 595$  nm.

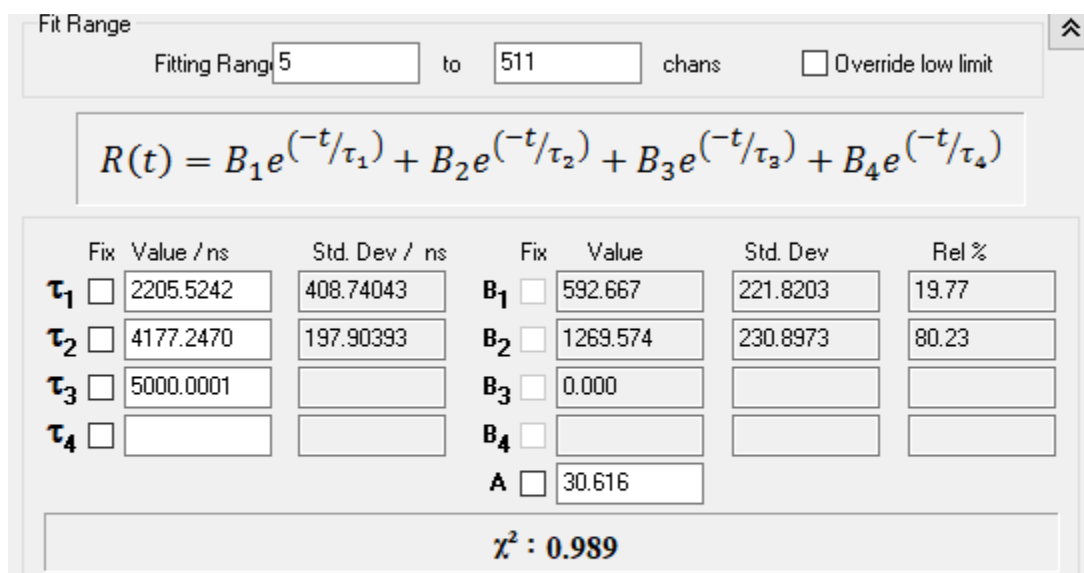

**Figure S79.** Fit result of Ir(III) co-system **4•5** in PMMA film at 298 K, excited at 365 nm. Data collected at  $\lambda_{\text{max}} = 595$  nm.

## S8. Cyclic voltammetry

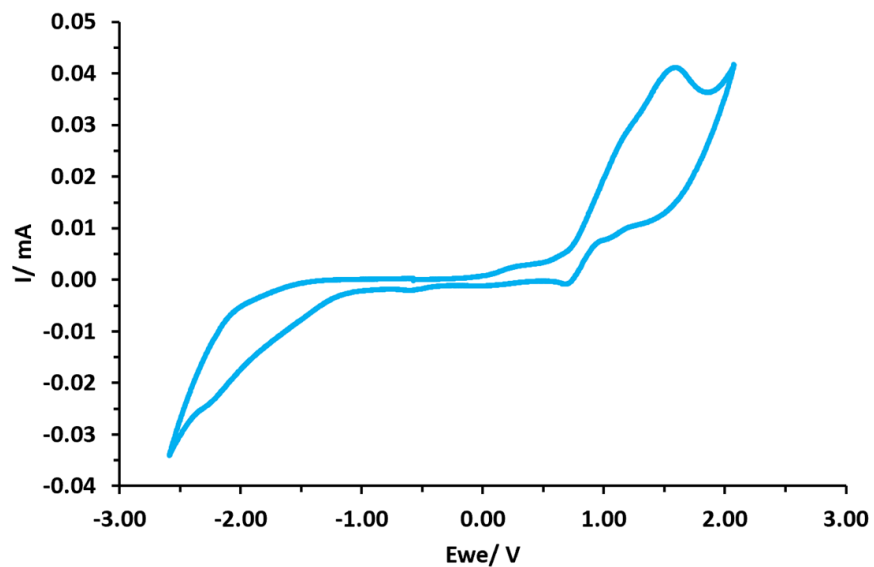

**Figure S80.** Cyclic voltammetry of complex **1** 2mM in dry degassed  $\text{CHCl}_3$  normalised to a ferrocene standard.

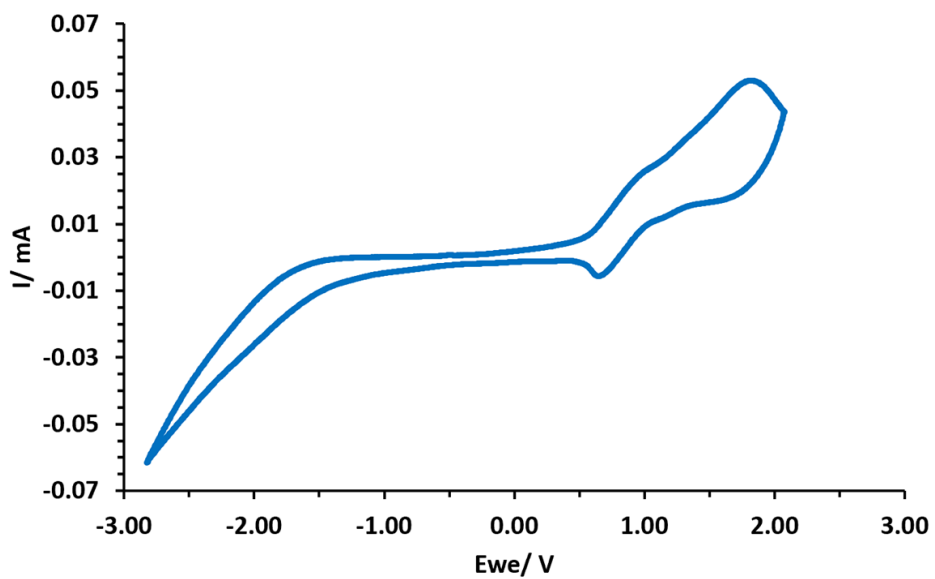

**Figure S81.** Cyclic voltammetry of co-system **1•5** 2mM 1:1 ratio between complex and binder in dry degassed  $\text{CHCl}_3$  normalised to a ferrocene standard.

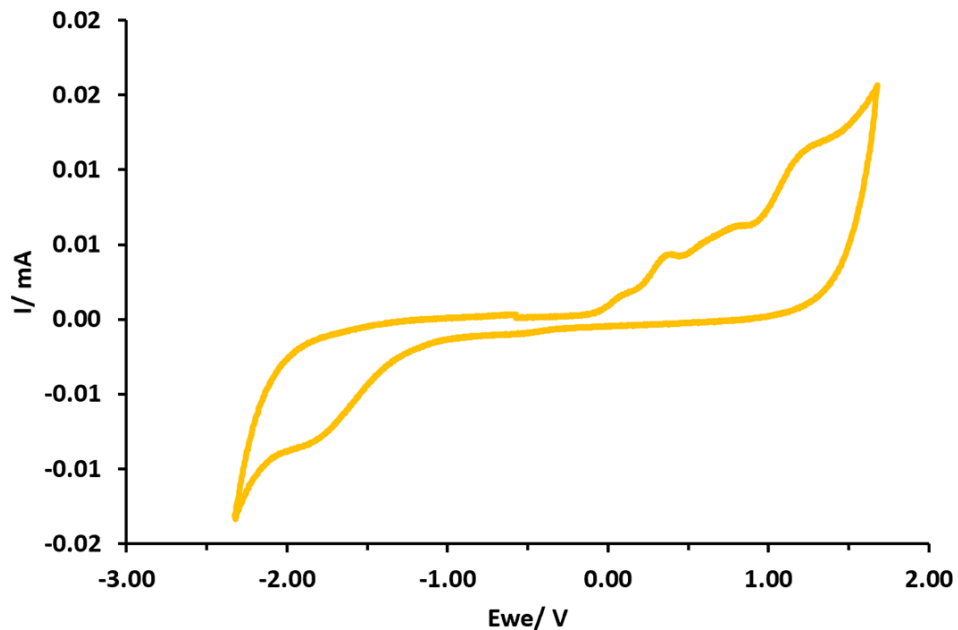

**Figure S82.** Cyclic voltammety of complex **2** 2mM in dry degassed  $\text{CHCl}_3$  normalised to a ferrocene standard.

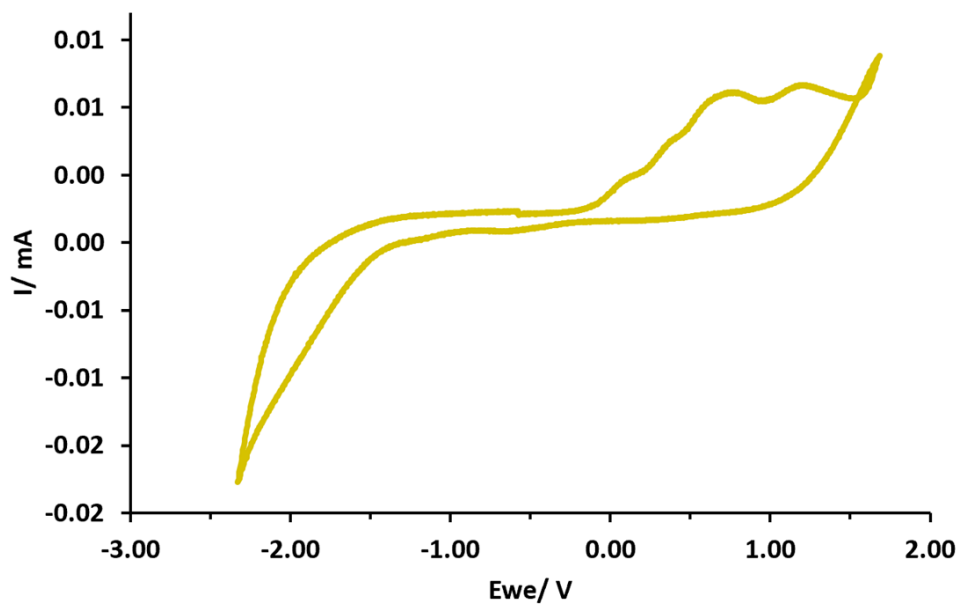

**Figure S83.** Cyclic voltammety of co-system **2•5** 2mM 1:1 ratio between complex and binder in dry degassed  $\text{CHCl}_3$  normalised to a ferrocene standard.

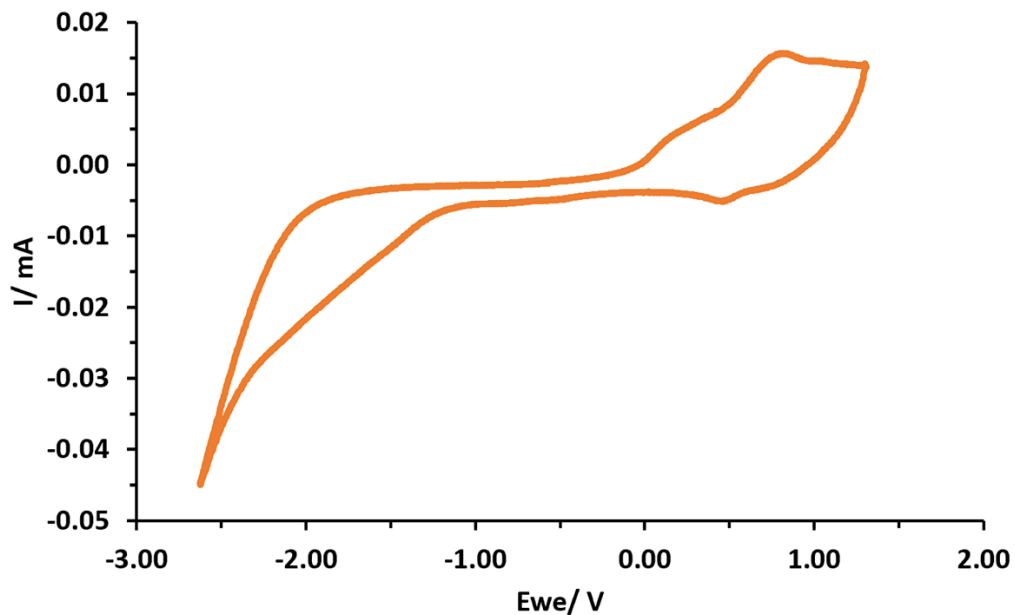

**Figure S84.** Cyclic voltammety of complex **3** 2mM in dry degassed  $\text{CHCl}_3$  normalised to a ferrocene standard.

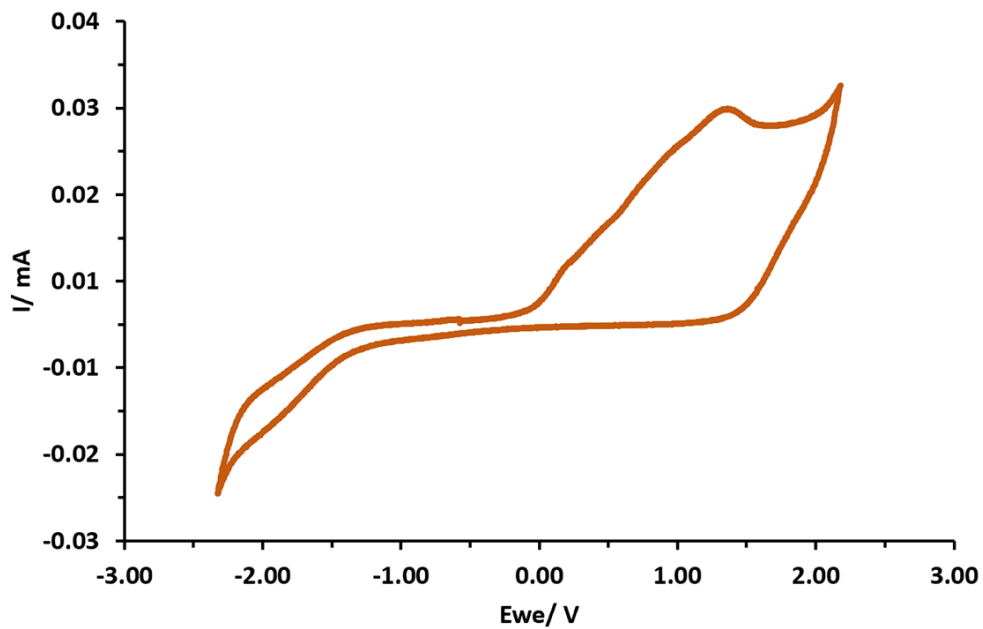

**Figure S85.** Cyclic voltammety of co-system **3•5** 2mM 1:1 ratio between complex and binder in dry degassed  $\text{CHCl}_3$  normalised to a ferrocene standard.

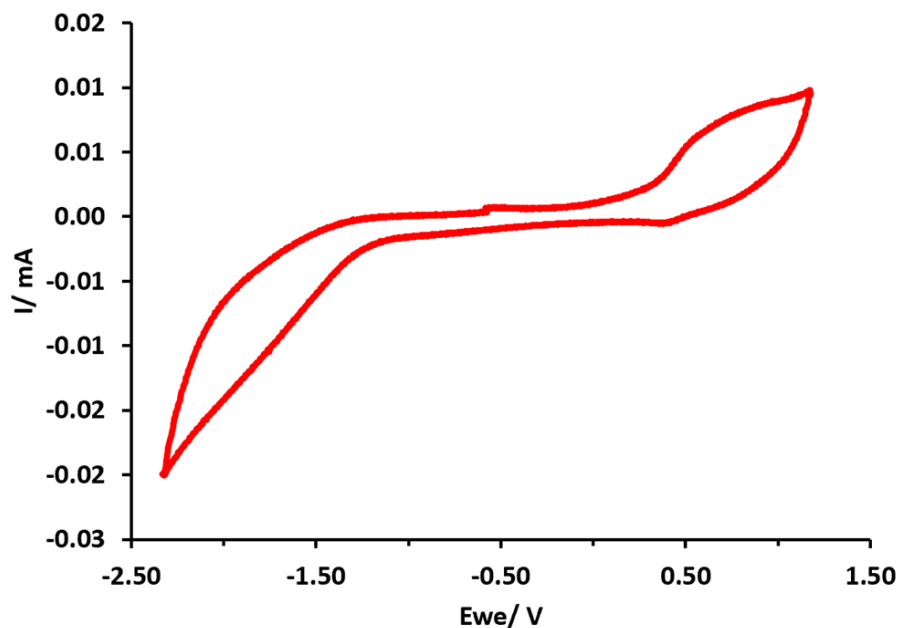

**Figure S86.** Cyclic voltammetry of complex **4** 2mM in dry degassed  $\text{CHCl}_3$  normalised to a ferrocene standard.

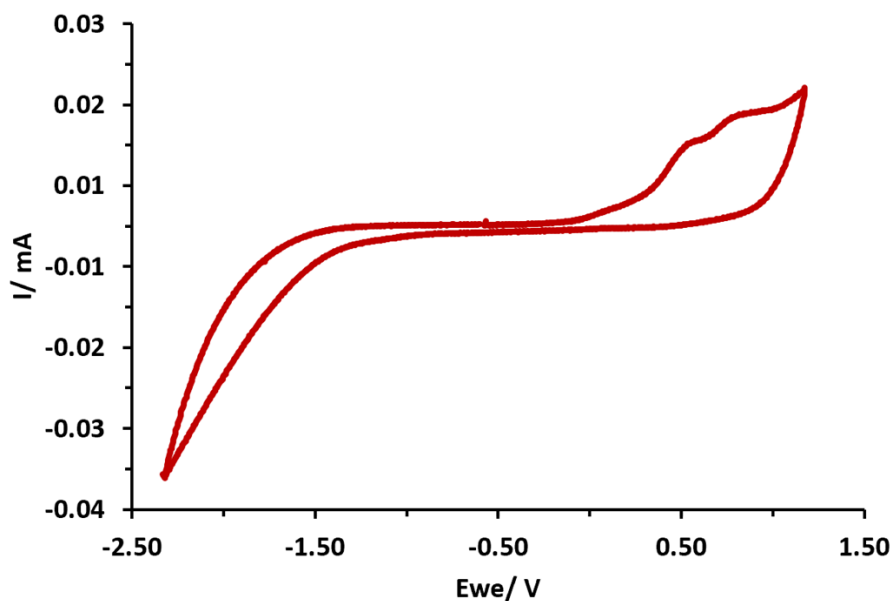

**Figure S87.** Cyclic voltammetry of co-system **4•5** 2mM 1:1 ratio between complex and binder in dry degassed  $\text{CHCl}_3$  normalised to a ferrocene standard.

## S9. DFT studies

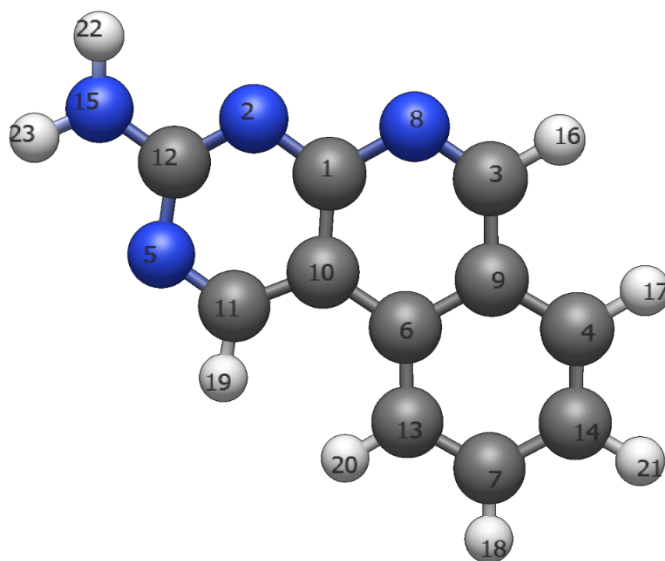

**Figure S88.** Optimised geometry model used for compound **5**, input file for geometry optimisation was based upon a .cif data file from previous publication.<sup>[10]</sup> TD-DFT inputs and energy calculations were based upon this optimised input model.

**Table S14.** Cartesian coordinates for optimised compound **5**.

| Center Number | Atomic Number | Atomic Type | Coordinates (Angstroms) |           |           |
|---------------|---------------|-------------|-------------------------|-----------|-----------|
|               |               |             | X                       | Y         | Z         |
| 1             | 6             | 0           | -1.024676               | 0.874857  | -0.000163 |
| 2             | 7             | 0           | -2.366849               | 0.958665  | -0.002106 |
| 3             | 6             | 0           | 0.953505                | 2.033977  | 0.004452  |
| 4             | 6             | 0           | 3.168106                | 0.902829  | 0.000424  |
| 5             | 7             | 0           | -2.509731               | -1.450133 | 0.009269  |
| 6             | 6             | 0           | 1.092025                | -0.412576 | -0.000300 |
| 7             | 6             | 0           | 3.259718                | -1.507121 | -0.004914 |
| 8             | 7             | 0           | -0.347759               | 2.079376  | 0.003860  |
| 9             | 6             | 0           | 1.758143                | 0.842654  | 0.001403  |
| 10            | 6             | 0           | -0.350763               | -0.379470 | 0.000719  |
| 11            | 6             | 0           | -1.192946               | -1.512677 | 0.011330  |
| 12            | 6             | 0           | -3.038340               | -0.191497 | -0.005056 |
| 13            | 6             | 0           | 1.878135                | -1.587562 | -0.004054 |
| 14            | 6             | 0           | 3.915307                | -0.259100 | -0.002498 |



|    |   |   |           |           |           |
|----|---|---|-----------|-----------|-----------|
| 15 | 7 | 0 | -4.397729 | -0.127532 | -0.043934 |
| 16 | 1 | 0 | 1.471961  | 2.995734  | 0.007558  |
| 17 | 1 | 0 | 3.654125  | 1.875698  | 0.001575  |
| 18 | 1 | 0 | 3.847904  | -2.420956 | -0.008074 |
| 19 | 1 | 0 | -0.769336 | -2.516231 | 0.025292  |
| 20 | 1 | 0 | 1.402686  | -2.563246 | -0.007577 |
| 21 | 1 | 0 | 5.000540  | -0.216179 | -0.003319 |
| 22 | 1 | 0 | -4.838659 | 0.768865  | 0.092124  |
| 23 | 1 | 0 | -4.924033 | -0.972208 | 0.114733  |

-----

**Energy**

E(RB3LYP) = -643.024565950 Hartree

Zero point corrected free energy = -642.848333 Hartree

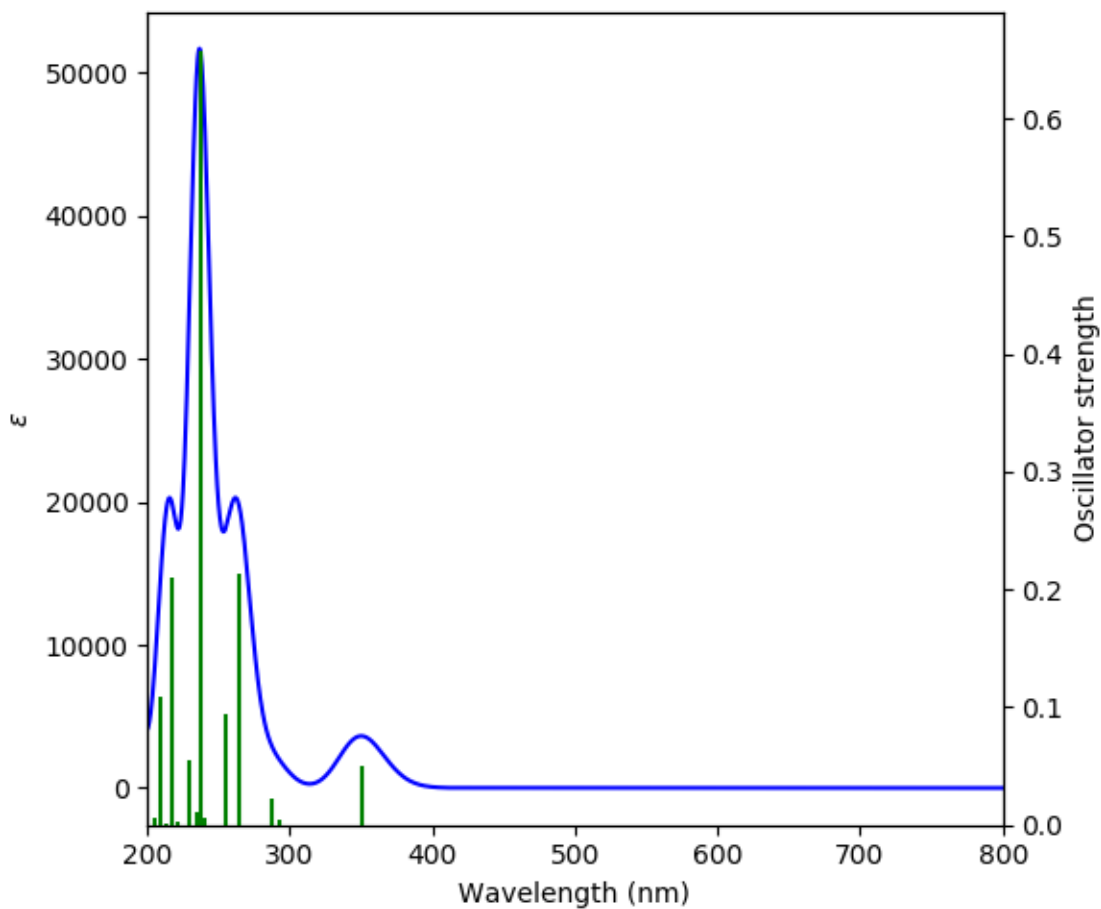

**Figure S89.** Calculated UV/vis spectrum for compound **5**.

**Table S15.** Calculated energy levels of the first ten singlet and first five triplet states for compound **5**.

| Spin State     | Transition configurations                                                                                       | Excitation energy<br>(eV, nm) | Oscillator strength |
|----------------|-----------------------------------------------------------------------------------------------------------------|-------------------------------|---------------------|
| S <sub>1</sub> | HOMO→LUMO (95.5%)<br>HOMO-2→LUMO+1 (2.63%)                                                                      | 3.5413, 350.11                | 0.0500              |
| S <sub>2</sub> | HOMO-1→LUMO (94.9%)                                                                                             | 3.6597, 338.78                | 0.0003              |
| S <sub>3</sub> | HOMO-3→LUMO (88.5%)<br>HOMO-1→LUMO+1 (7.3%)                                                                     | 4.2363, 292.67                | 0.0039              |
| S <sub>4</sub> | HOMO→LUMO+1 (55.1%)<br>HOMO-2→LUMO (42.7%)                                                                      | 4.3248, 286.68                | 0.0230              |
| S <sub>5</sub> | HOMO-1→LUMO+1 (87.8%)<br>HOMO-3→LUMO (6.5%)                                                                     | 4.5903, 270.10                | 0.0002              |
| S <sub>6</sub> | HOMO→LUMO+2 (39.6%)<br>HOMO-2→LUMO (31.3%)<br>HOMO→LUMO+1 (25.3%)                                               | 4.6841, 264.69                | 0.2127              |
| S <sub>7</sub> | HOMO-4→LUMO (42.1%)<br>HOMO-2→LUMO+1 (20.3%)<br>HOMO-2→LUMO (6.1%)<br>HOMO→LUMO+1 (5.2%)<br>HOMO→LUMO+2 (22.7%) | 4.8494, 255.67                | 0.0941              |
| S <sub>8</sub> | HOMO-2→LUMO+2 (84.6%)<br>HOMO-3→LUMO+1 (8.2%)<br>HOMO-2→LUMO (2.2%)                                             | 5.1571, 240.41                | 0.0053              |
| S <sub>9</sub> | HOMO→LUMO+2 (31.1%)                                                                                             | 5.2321, 236.97                | 0.6581              |

|                 |                                                                                                                                          |                |        |
|-----------------|------------------------------------------------------------------------------------------------------------------------------------------|----------------|--------|
|                 | HOMO-4→LUMO (21.1%)<br>HOMO→LUMO+1 (10.6%)<br>HOMO-2→LUMO+1 (10.3%)<br>HOMO-2→LUMO+2 (4.0%)<br>HOMO-5→LUMO (4.6%)<br>HOMO-2→LUMO (12.7%) |                |        |
| S <sub>10</sub> | HOMO-3→LUMO+1 (84.2%)<br>HOMO-6→LUMO (2.1%)<br>HOMO-1→LUMO+2 (8.1%)                                                                      | 5.2798, 234.83 | 0.0112 |
| T <sub>1</sub>  | HOMO→LUMO (91.1%)<br>HOMO-2→LUMO (3.9%)                                                                                                  | 2.8435, 436.02 | 0.0000 |
| T <sub>2</sub>  | HOMO→LUMO+1 (41.8%)<br>HOMO-2→LUMO (40.3%)<br>HOMO→LUMO (5.2%)<br>HOMO-5→LUMO+2 (2.0%)<br>HOMO-4→LUMO+1 (2.5%)                           | 3.0139, 411.37 | 0.0000 |
| T <sub>3</sub>  | HOMO-1→LUMO (88.8%)<br>HOMO-3→LUMO (3.6%)<br>HOMO-1→LUMO+2 (2.1%)                                                                        | 3.3269, 372.67 | 0.0000 |
| T <sub>4</sub>  | HOMO→LUMO+1 (49.5%)<br>HOMO-4→LUMO (2.5%)<br>HOMO-2→LUMO (42.9%)                                                                         | 3.5972, 344.67 | 0.0000 |
| T <sub>5</sub>  | HOMO-3→LUMO (81.8%)<br>HOMO-1→LUMO+2 (7.0%)<br>HOMO-1→LUMO+1 (4.6%)                                                                      | 3.7499, 330.63 | 0.0000 |

**Table S16.** Calculated MO energies of orbitals involved in transitions for **5**.

| Orbital                                                                                      | Energy/<br>eV | Orbital                                                                                        | Energy/<br>eV |
|----------------------------------------------------------------------------------------------|---------------|------------------------------------------------------------------------------------------------|---------------|
| LUMO+2<br>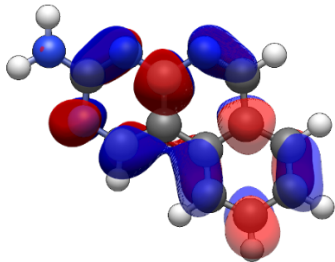  | -0.37         | HOMO<br>     | -5.89         |
| LUMO+1<br> | -1.04         | HOMO-1<br>  | -6.58         |
| LUMO<br>  | -1.82         | HOMO-2<br> | -6.86         |
|                                                                                              |               | HOMO-3<br> | -7.21         |

|  |  |                                                                                               |       |
|--|--|-----------------------------------------------------------------------------------------------|-------|
|  |  | HOMO-4<br>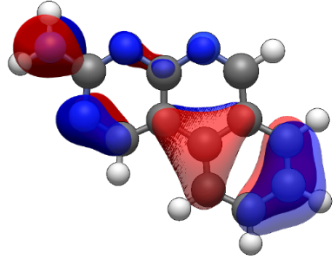  | -7.57 |
|  |  | HOMO-5<br>  | -8.14 |
|  |  | HOMO-6<br> | -8.42 |

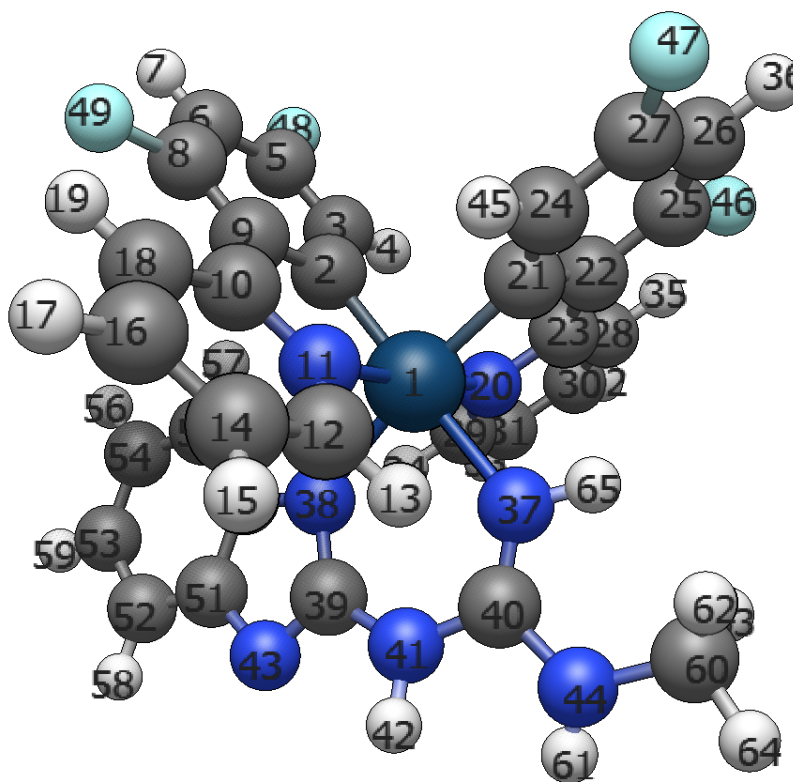

**Figure S90.** Optimised geometry model used for complex **1**. TD-DFT inputs and energy calculations were based upon this optimised input model.

**Table S17.** Cartesian coordinates for optimised compound **1**.

| Center Number | Atomic Number | Atomic Type | Coordinates (Angstroms) |           |           |
|---------------|---------------|-------------|-------------------------|-----------|-----------|
|               |               |             | X                       | Y         | Z         |
| 1             | 77            | 0           | 0.171949                | -0.246891 | 0.141692  |
| 2             | 6             | 0           | -0.307385               | 1.624185  | -0.442635 |
| 3             | 6             | 0           | -0.097484               | 2.197913  | -1.705711 |
| 4             | 1             | 0           | 0.342854                | 1.633936  | -2.520427 |
| 5             | 6             | 0           | -0.468876               | 3.514422  | -1.942193 |
| 6             | 6             | 0           | -1.051542               | 4.321855  | -0.968801 |
| 7             | 1             | 0           | -1.337846               | 5.346348  | -1.170750 |
| 8             | 6             | 0           | -1.239240               | 3.756796  | 0.280766  |
| 9             | 6             | 0           | -0.879858               | 2.434340  | 0.584113  |
| 10            | 6             | 0           | -1.015211               | 1.799256  | 1.891198  |
| 11            | 7             | 0           | -0.523350               | 0.520837  | 1.937122  |
| 12            | 6             | 0           | -0.563019               | -0.174779 | 3.088664  |

|    |   |   |           |           |           |
|----|---|---|-----------|-----------|-----------|
| 13 | 1 | 0 | -0.147146 | -1.172946 | 3.040921  |
| 14 | 6 | 0 | -1.091843 | 0.344701  | 4.260365  |
| 15 | 1 | 0 | -1.101018 | -0.257306 | 5.162548  |
| 16 | 6 | 0 | -1.607225 | 1.642374  | 4.234247  |
| 17 | 1 | 0 | -2.037067 | 2.085644  | 5.127897  |
| 18 | 6 | 0 | -1.567546 | 2.368367  | 3.052052  |
| 19 | 1 | 0 | -1.960489 | 3.373040  | 3.009513  |
| 20 | 7 | 0 | 0.902439  | -0.860656 | -1.695019 |
| 21 | 6 | 0 | 2.101251  | 0.335684  | 0.327763  |
| 22 | 6 | 0 | 2.924828  | -0.013041 | -0.787332 |
| 23 | 6 | 0 | 2.240995  | -0.661467 | -1.908862 |
| 24 | 6 | 0 | 2.695520  | 0.978199  | 1.422973  |
| 25 | 6 | 0 | 4.293081  | 0.295449  | -0.738048 |
| 26 | 6 | 0 | 4.885136  | 0.927030  | 0.342989  |
| 27 | 6 | 0 | 4.055966  | 1.258946  | 1.411110  |
| 28 | 6 | 0 | 2.811050  | -1.061094 | -3.128801 |
| 29 | 6 | 0 | 0.136980  | -1.426035 | -2.647445 |
| 30 | 6 | 0 | 2.017319  | -1.645465 | -4.108783 |
| 31 | 6 | 0 | 0.654893  | -1.831922 | -3.870017 |
| 32 | 1 | 0 | 2.460099  | -1.948083 | -5.053517 |
| 33 | 1 | 0 | -0.000984 | -2.277310 | -4.610096 |
| 34 | 1 | 0 | -0.910653 | -1.535778 | -2.395270 |
| 35 | 1 | 0 | 3.865881  | -0.902072 | -3.296745 |
| 36 | 1 | 0 | 5.944174  | 1.152988  | 0.349525  |
| 37 | 7 | 0 | 0.748132  | -2.211543 | 0.922331  |
| 38 | 7 | 0 | -1.809435 | -1.176935 | -0.136796 |
| 39 | 6 | 0 | -2.176588 | -2.376267 | 0.382902  |
| 40 | 6 | 0 | 0.021385  | -3.251149 | 1.223718  |
| 41 | 7 | 0 | -1.331262 | -3.242937 | 1.102188  |
| 42 | 1 | 0 | -1.850212 | -4.027627 | 1.473736  |
| 43 | 7 | 0 | -3.426415 | -2.779989 | 0.214585  |
| 44 | 7 | 0 | 0.534846  | -4.416989 | 1.769596  |
| 45 | 1 | 0 | 2.112953  | 1.272642  | 2.289468  |
| 46 | 9 | 0 | 5.109298  | -0.028086 | -1.774095 |
| 47 | 9 | 0 | 4.610391  | 1.875942  | 2.474659  |
| 48 | 9 | 0 | -0.263620 | 4.044790  | -3.165231 |
| 49 | 9 | 0 | -1.793134 | 4.553093  | 1.230022  |
| 50 | 6 | 0 | -2.993047 | -0.741109 | -0.741037 |
| 51 | 6 | 0 | -3.979948 | -1.742440 | -0.508340 |
| 52 | 6 | 0 | -5.282592 | -1.592740 | -1.002212 |
| 53 | 6 | 0 | -5.582097 | -0.444739 | -1.729228 |
| 54 | 6 | 0 | -4.602433 | 0.539581  | -1.965674 |
| 55 | 6 | 0 | -3.301974 | 0.407943  | -1.480422 |
| 56 | 1 | 0 | -4.864640 | 1.424970  | -2.539672 |
| 57 | 1 | 0 | -2.560282 | 1.173508  | -1.671708 |
| 58 | 1 | 0 | -6.028063 | -2.361504 | -0.817834 |

|    |   |   |           |           |           |
|----|---|---|-----------|-----------|-----------|
| 59 | 1 | 0 | -6.585301 | -0.304085 | -2.124244 |
| 60 | 6 | 0 | 1.967027  | -4.600460 | 1.943935  |
| 61 | 1 | 0 | 0.025837  | -5.255267 | 1.519664  |
| 62 | 1 | 0 | 2.366794  | -3.821774 | 2.601425  |
| 63 | 1 | 0 | 2.529264  | -4.587048 | 0.997825  |
| 64 | 1 | 0 | 2.132903  | -5.564010 | 2.430791  |
| 65 | 1 | 0 | 1.746625  | -2.377806 | 0.972923  |

---

### Energy

E(RB3LYP) = -2081.96656471 Hartree

Zero point corrected free energy = -2081.483287 Hartree

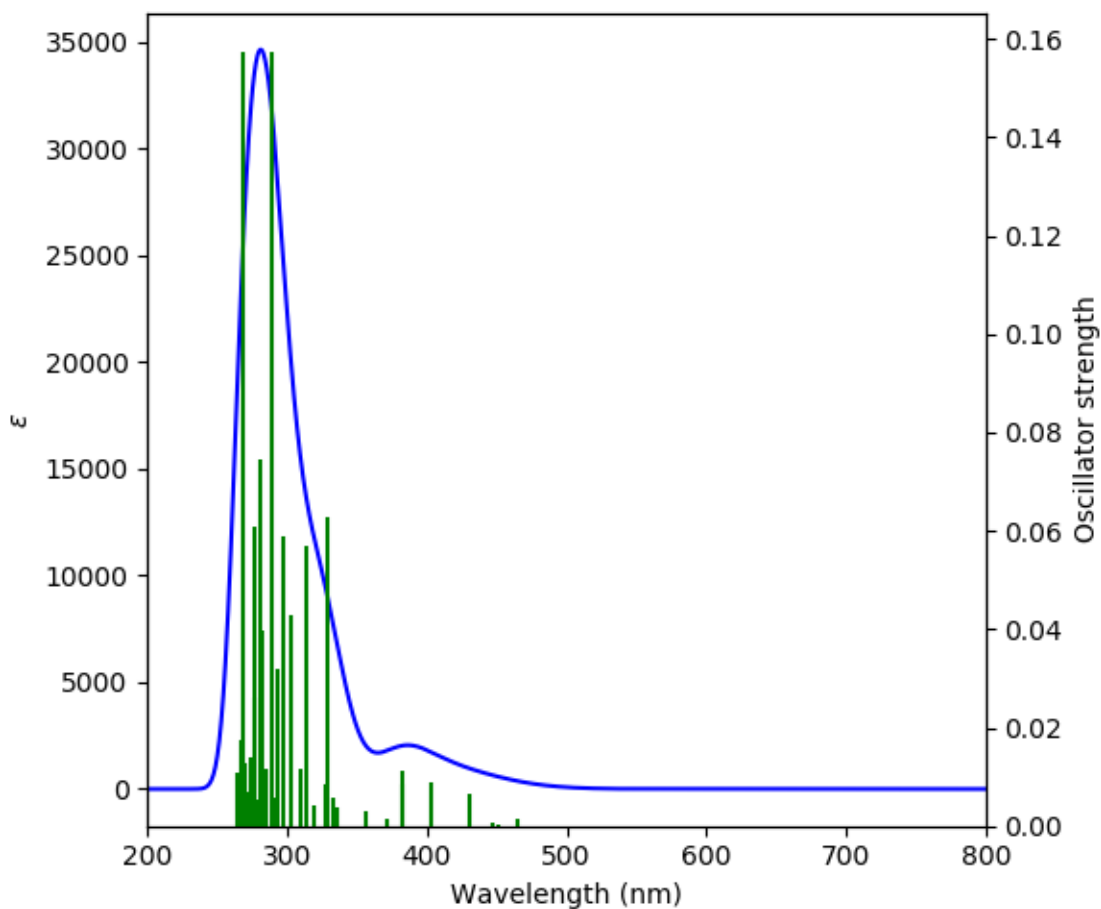

**Figure S91.** Calculated UV/vis spectrum for complex 1.



**Table S18.** Calculated energy levels of the first ten singlet and first five triplet states for complex 1.

| Spin State      | Transition configurations                                            | Excitation energy<br>(eV, nm) | Oscillator strength |
|-----------------|----------------------------------------------------------------------|-------------------------------|---------------------|
| S <sub>1</sub>  | HOMO→LUMO (93.4%)<br>HOMO-1→LUMO (4.9%)                              | 2.6677, 464.77                | 0.0014              |
| S <sub>2</sub>  | HOMO-1→LUMO (91.8%)<br>HOMO→LUMO (5.0%)                              | 2.7494, 450.95                | 0.0004              |
| S <sub>3</sub>  | HOMO→LUMO+1 (96.3%)                                                  | 2.7755, 446.71                | 0.0007              |
| S <sub>4</sub>  | HOMO-1→LUMO+1 (96.7%)                                                | 2.8821, 430.18                | 0.0064              |
| S <sub>5</sub>  | HOMO-2→LUMO (95.7%)                                                  | 3.0768, 402.96                | 0.0089              |
| S <sub>6</sub>  | HOMO→LUMO+2 (76.2%)<br>HOMO-1→LUMO+2 (3.0%)<br>HOMO-2→LUMO+1 (19.1%) | 3.2420, 382.43                | 0.0085              |
| S <sub>7</sub>  | HOMO-2→LUMO+1 (74.8%)<br>HOMO→LUMO+2 (20.5%)                         | 3.2441, 382.19                | 0.0113              |
| S <sub>8</sub>  | HOMO-1→LUMO+1 (95.2%)<br>HOMO→LUMO+2 (2.1%)                          | 3.3402, 371.19                | 0.0015              |
| S <sub>9</sub>  | HOMO→LUMO+3 (96.4%)<br>HOMO-1→LUMO+3 (2.8%)                          | 3.3711, 367.79                | 0.0000              |
| S <sub>10</sub> | HOMO-1→LUMO+3 (95.2%)<br>HOMO→LUMO+3 (2.9%)                          | 3.4804, 356.23                | 0.0032              |
| T <sub>1</sub>  | HOMO→LUMO (72.5%)<br>HOMO-1→LUMO (13.2%)<br>HOMO-2→LUMO (6.5%)       | 2.6327, 470.95                | 0.0000              |

|                |                                                                                                                                                         |                |        |
|----------------|---------------------------------------------------------------------------------------------------------------------------------------------------------|----------------|--------|
|                | HOMO-4→LUMO (3.5%)                                                                                                                                      |                |        |
| T <sub>2</sub> | HOMO-1→LUMO (74.9%)<br>HOMO→LUMO (19.6%)                                                                                                                | 2.7311, 453.97 | 0.0000 |
| T <sub>3</sub> | HOMO→LUMO+1 (74.4%)<br>HOMO-1→LUMO+1 (15.3%)<br>HOMO-2→LUMO+1 (7.9%)                                                                                    | 2.7534, 450.30 | 0.0000 |
| T <sub>4</sub> | HOMO-1→LUMO+1 (70.0%)<br>HOMO-3→LUMO+1 (10.1%)<br>HOMO-2→LUMO+1 (4.4%)<br>HOMO→LUMO+1 (8.1%)                                                            | 2.7978, 443.15 | 0.0000 |
| T <sub>5</sub> | HOMO-2→LUMO (52.9%)<br>HOMO-4→LUMO (6.2%)<br>HOMO-6→LUMO (4.8%)<br>HOMO-1→LUMO+1 (3.0%)<br>HOMO→LUMO (6.0%)<br>HOMO-1→LUMO (7.9%)<br>HOMO-5→LUMO (8.4%) | 2.8350, 437.34 | 0.0000 |

**Table S19.** Calculated MO energies of orbitals involved in transitions for **1**.

| Orbital | Energy/<br>eV | Orbital | Energy/<br>eV |
|---------|---------------|---------|---------------|
|---------|---------------|---------|---------------|

|                                                                                                  |       |                                                                                                    |       |
|--------------------------------------------------------------------------------------------------|-------|----------------------------------------------------------------------------------------------------|-------|
| 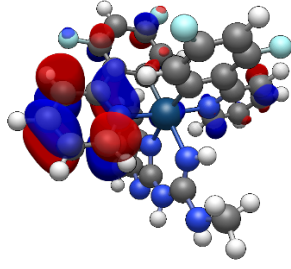 <p>LUMO+3</p>  | -0.84 |  <p>HOMO</p>     | -4.75 |
|  <p>LUMO+2</p>  | -1.00 |  <p>HOMO-1</p>   | -4.90 |
|  <p>LUMO+1</p> | -1.42 |  <p>HOMO-2</p>  | -5.42 |
|  <p>LUMO</p>  | -1.59 |  <p>HOMO-3</p> | -5.98 |
|                                                                                                  |       |  <p>HOMO-4</p> | -6.03 |

|  |  |                                                                                              |       |
|--|--|----------------------------------------------------------------------------------------------|-------|
|  |  | HOMO-5<br>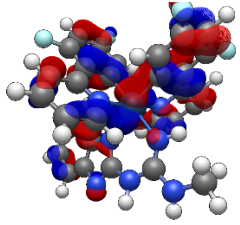 | -6.20 |
|  |  | HOMO-6<br> | -6.27 |

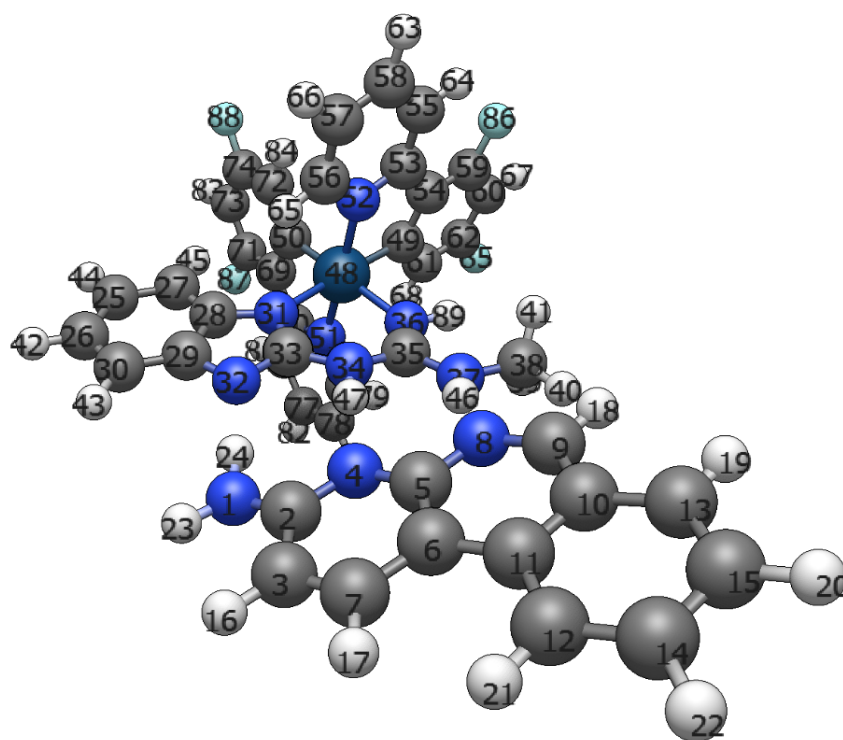

**Figure S92.** Optimised geometry model used for co-system **1•5**. TD-DFT inputs and energy calculations were based upon this optimised input model.

**Table S20.** Cartesian coordinates for optimised co-system **1•5**.

| Center<br>Number | Atomic<br>Number | Atomic<br>Type | Coordinates (Angstroms) |           |           |
|------------------|------------------|----------------|-------------------------|-----------|-----------|
|                  |                  |                | X                       | Y         | Z         |
| 1                | 7                | 0              | 4.134791                | 3.579621  | 0.149459  |
| 2                | 6                | 0              | 5.114531                | 2.653171  | 0.130509  |
| 3                | 6                | 0              | 6.489861                | 3.056021  | 0.059889  |
| 4                | 7                | 0              | 4.768641                | 1.357771  | 0.202229  |
| 5                | 6                | 0              | 5.743671                | 0.423211  | 0.190119  |
| 6                | 6                | 0              | 7.130441                | 0.725461  | 0.098819  |
| 7                | 6                | 0              | 7.469011                | 2.103711  | 0.040749  |
| 8                | 7                | 0              | 5.294461                | -0.881689 | 0.273629  |
| 9                | 6                | 0              | 6.169671                | -1.851419 | 0.243229  |
| 10               | 6                | 0              | 7.583151                | -1.680109 | 0.137259  |
| 11               | 6                | 0              | 8.087041                | -0.350109 | 0.069529  |
| 12               | 6                | 0              | 9.490651                | -0.178449 | -0.026131 |
| 13               | 6                | 0              | 8.464431                | -2.785869 | 0.108359  |
| 14               | 6                | 0              | 10.334591               | -1.272329 | -0.052921 |
| 15               | 6                | 0              | 9.826191                | -2.588609 | 0.014109  |
| 16               | 1                | 0              | 6.735401                | 4.113231  | 0.015449  |
| 17               | 1                | 0              | 8.508741                | 2.409391  | -0.021961 |
| 18               | 1                | 0              | 5.775491                | -2.867269 | 0.306089  |
| 19               | 1                | 0              | 8.050781                | -3.790299 | 0.161649  |
| 20               | 1                | 0              | 10.506221               | -3.434889 | -0.008581 |
| 21               | 1                | 0              | 9.915021                | 0.818681  | -0.080741 |
| 22               | 1                | 0              | 11.407621               | -1.117189 | -0.127151 |
| 23               | 1                | 0              | 4.383251                | 4.541211  | -0.030221 |
| 24               | 1                | 0              | 3.143631                | 3.303031  | -0.015711 |
| 25               | 6                | 0              | -2.054319               | 4.739581  | -1.543821 |
| 26               | 6                | 0              | -0.877249               | 5.510611  | -1.553861 |
| 27               | 6                | 0              | -2.046029               | 3.398691  | -1.159521 |
| 28               | 6                | 0              | -0.824249               | 2.831471  | -0.777721 |
| 29               | 6                | 0              | 0.365831                | 3.608321  | -0.796451 |
| 30               | 6                | 0              | 0.343731                | 4.953821  | -1.183201 |
| 31               | 7                | 0              | -0.476679               | 1.542171  | -0.362651 |
| 32               | 7                | 0              | 1.424881                | 2.818841  | -0.398711 |
| 33               | 6                | 0              | 0.863321                | 1.631721  | -0.163721 |
| 34               | 7                | 0              | 1.713851                | 0.589401  | 0.215979  |
| 35               | 6                | 0              | 1.404501                | -0.644339 | 0.710959  |
| 36               | 7                | 0              | 0.164121                | -1.047819 | 0.856329  |
| 37               | 7                | 0              | 2.481291                | -1.396919 | 1.074599  |
| 38               | 6                | 0              | 2.346541                | -2.765189 | 1.525419  |
| 39               | 1                | 0              | 1.753101                | -2.829389 | 2.447009  |
| 40               | 1                | 0              | 3.345271                | -3.146219 | 1.750259  |

|    |    |   |           |           |           |
|----|----|---|-----------|-----------|-----------|
| 41 | 1  | 0 | 1.887611  | -3.424259 | 0.772189  |
| 42 | 1  | 0 | -0.922959 | 6.553061  | -1.859391 |
| 43 | 1  | 0 | 1.259061  | 5.540511  | -1.195731 |
| 44 | 1  | 0 | -2.993759 | 5.196601  | -1.844511 |
| 45 | 1  | 0 | -2.959039 | 2.818301  | -1.167161 |
| 46 | 1  | 0 | 3.414151  | -1.109099 | 0.756519  |
| 47 | 1  | 0 | 2.705361  | 0.854631  | 0.218439  |
| 48 | 77 | 0 | -1.705279 | -0.234529 | 0.096169  |
| 49 | 6  | 0 | -2.566489 | -2.031359 | 0.444549  |
| 50 | 6  | 0 | -3.527079 | 0.474271  | -0.423331 |
| 51 | 7  | 0 | -2.258549 | 0.660961  | 1.877929  |
| 52 | 7  | 0 | -1.317119 | -1.164279 | -1.710381 |
| 53 | 6  | 0 | -1.731709 | -2.465329 | -1.819801 |
| 54 | 6  | 0 | -2.413259 | -2.967279 | -0.624951 |
| 55 | 6  | 0 | -1.496089 | -3.166349 | -3.014021 |
| 56 | 6  | 0 | -0.697249 | -0.559769 | -2.741241 |
| 57 | 6  | 0 | -0.446059 | -1.210199 | -3.941531 |
| 58 | 6  | 0 | -0.853479 | -2.538539 | -4.074231 |
| 59 | 6  | 0 | -2.923799 | -4.264089 | -0.464361 |
| 60 | 6  | 0 | -3.573859 | -4.682419 | 0.685139  |
| 61 | 6  | 0 | -3.225469 | -2.449409 | 1.609359  |
| 62 | 6  | 0 | -3.710839 | -3.747399 | 1.707109  |
| 63 | 1  | 0 | -0.676839 | -3.082199 | -4.998051 |
| 64 | 1  | 0 | -1.825339 | -4.191299 | -3.098721 |
| 65 | 1  | 0 | -0.411389 | 0.470371  | -2.567481 |
| 66 | 1  | 0 | 0.054121  | -0.681079 | -4.745381 |
| 67 | 1  | 0 | -3.957609 | -5.690849 | 0.777029  |
| 68 | 1  | 0 | -3.374499 | -1.776689 | 2.447159  |
| 69 | 6  | 0 | -4.221769 | 1.136451  | 0.636169  |
| 70 | 6  | 0 | -3.493159 | 1.255201  | 1.896529  |
| 71 | 6  | 0 | -5.512899 | 1.629841  | 0.394239  |
| 72 | 6  | 0 | -4.175289 | 0.336661  | -1.659871 |
| 73 | 6  | 0 | -6.151639 | 1.505451  | -0.827901 |
| 74 | 6  | 0 | -5.453289 | 0.848161  | -1.837641 |
| 75 | 6  | 0 | -3.927699 | 1.904091  | 3.065359  |
| 76 | 6  | 0 | -1.467099 | 0.709961  | 2.965489  |
| 77 | 6  | 0 | -3.108399 | 1.945491  | 4.185409  |
| 78 | 6  | 0 | -1.851329 | 1.338981  | 4.140249  |
| 79 | 1  | 0 | -0.508169 | 0.218231  | 2.856929  |
| 80 | 1  | 0 | -1.178149 | 1.352221  | 4.990659  |
| 81 | 1  | 0 | -4.900519 | 2.372231  | 3.077019  |
| 82 | 1  | 0 | -3.447479 | 2.450511  | 5.085449  |
| 83 | 1  | 0 | -7.149339 | 1.896650  | -0.982651 |
| 84 | 1  | 0 | -3.698419 | -0.158929 | -2.498341 |
| 85 | 9  | 0 | -4.340589 | -4.131749 | 2.836889  |
| 86 | 9  | 0 | -2.791079 | -5.184479 | -1.454741 |

|    |   |   |           |           |           |
|----|---|---|-----------|-----------|-----------|
| 87 | 9 | 0 | -6.202869 | 2.263981  | 1.377169  |
| 88 | 9 | 0 | -6.056479 | 0.709401  | -3.036741 |
| 89 | 1 | 0 | 0.092311  | -2.001949 | 1.188959  |

---

### Energy

E(RB3LYP) = -2708.97695866 Hartree

Zero point corrected free energy = -2708.303831 Hartree

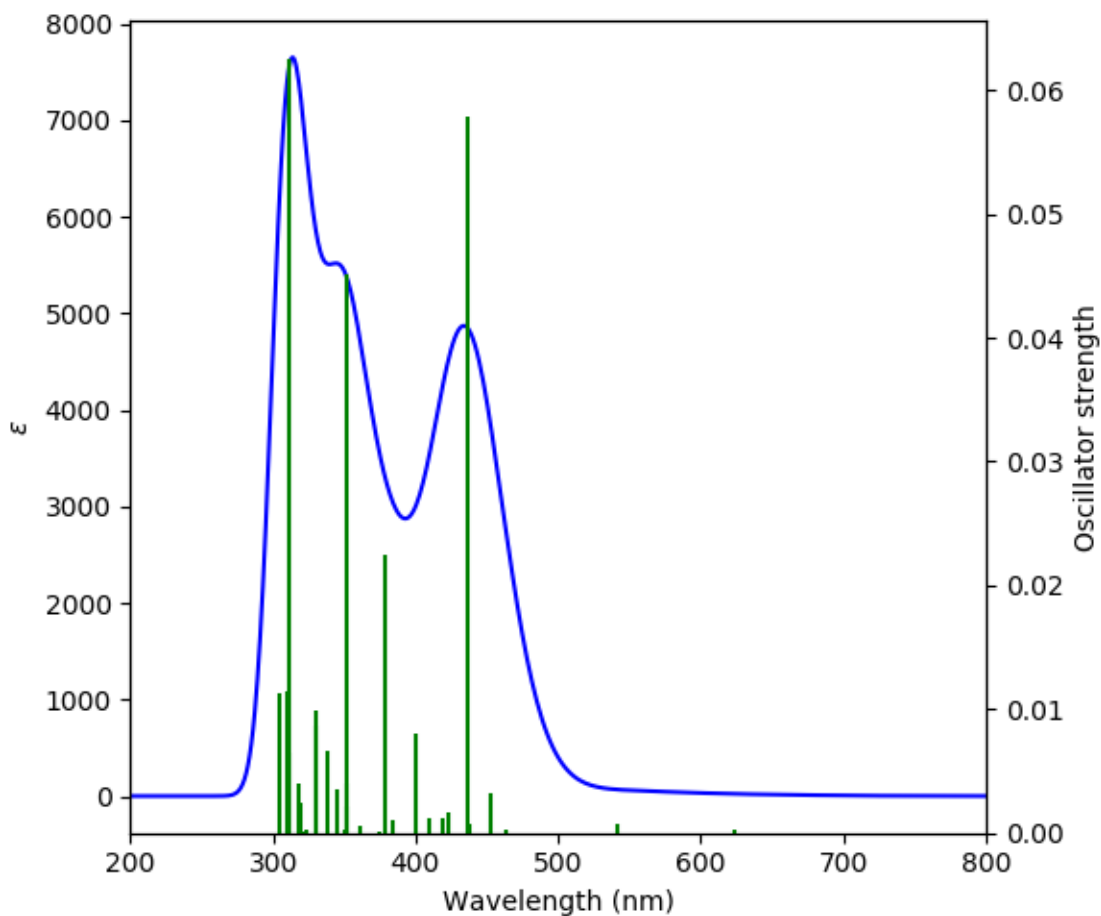

**Figure S93.** Calculated UV/vis spectrum for co-system **1•5**.

**Table S21.** Calculated energy levels of the ten highest contributing singlet states and the first five triplet states for co-system **1•5**.

| Spin State      | Transition configurations                                                                                                                      | Excitation energy<br>(eV, nm) | Oscillator strength |
|-----------------|------------------------------------------------------------------------------------------------------------------------------------------------|-------------------------------|---------------------|
| S <sub>6</sub>  | HOMO-3→LUMO (97.0%)                                                                                                                            | 2.8418, 436.29                | 0.0579              |
| S <sub>10</sub> | HOMO-2→LUMO+1 (89.5%)<br>HOMO-1→LUMO+1 (5.8%)                                                                                                  | 3.1012, 399.79                | 0.0081              |
| S <sub>12</sub> | HOMO-2→LUMO+2 (89.9%)<br>HOMO-1→LUMO+2 (5.8%)                                                                                                  | 3.2696, 379.21                | 0.0224              |
| S <sub>18</sub> | HOMO-4→LUMO+1 (78.4%)<br>HOMO-4→LUMO+2 (13.1%)                                                                                                 | 3.5288, 351.35                | 0.0451              |
| S <sub>23</sub> | HOMO-5→LUMO+1 (41.4%)<br>HOMO-6→LUMO+1 (10.4%)<br>HOMO-2→LUMO+4 (41.2%)                                                                        | 3.7595, 329.58                | 0.0086              |
| S <sub>25</sub> | HOMO-2→LUMO+4 (50.0%)<br>HOMO-5→LUMO+1 (36.1%)<br>HOMO-7→LUMO+1 (4.0%)<br>HOMO-4→LUMO+1 (2.6%)                                                 | 3.7632, 329.46                | 0.0099              |
| S <sub>29</sub> | HOMO-2→LUMO+5 (87.2%)<br>HOMO-5→LUMO+2 (5.1%)                                                                                                  | 3.8962, 318.22                | 0.0040              |
| S <sub>32</sub> | HOMO-5→LUMO+2 (66.3%)<br>HOMO-6→LUMO+2 (4.9%)<br>HOMO-7→LUMO+2 (2.9%)<br>HOMO-5→LUMO+1 (3.1%)<br>HOMO-2→LUMO+5 (5.3%)<br>HOMO-3→LUMO+2 (10.4%) | 3.9754, 311.88                | 0.0625              |
| S <sub>33</sub> | HOMO-3→LUMO+2 (89.3%)                                                                                                                          | 3.9811, 311.43                | 0.0065              |



|                 |                                                                                                |                |        |
|-----------------|------------------------------------------------------------------------------------------------|----------------|--------|
|                 | HOMO-5→LUMO+2 (7.4%)                                                                           |                |        |
| S <sub>34</sub> | HOMO-6→LUMO+1 (54.1%)<br>HOMO-4→LUMO+4 (26.4%)<br>HOMO-2→LUMO+4 (2.0%)<br>HOMO-5→LUMO+1 (7.7%) | 3.9988, 310.05 | 0.0114 |
| T <sub>1</sub>  | HOMO-3→LUMO (81.6%)<br>HOMO-11→LUMO (2.3%)<br>HOMO→LUMO (8.1%)                                 | 1.8836, 658.24 | 0.0000 |
| T <sub>2</sub>  | HOMO→LUMO (91.6%)<br>HOMO-3→LUMO (7.0%)                                                        | 1.9946, 621.60 | 0.0000 |
| T <sub>3</sub>  | HOMO-1→LUMO (97.8%)                                                                            | 2.2925, 540.83 | 0.0000 |
| T <sub>4</sub>  | HOMO-2→LUMO (99.3%)                                                                            | 2.6756, 463.39 | 0.0000 |
| T <sub>5</sub>  | HOMO-1→LUMO+1 (77.8%)<br>HOMO-2→LUMO+1 (5.0%)<br>HOMO-1→LUMO+1 (3.2%)<br>HOMO-4→LUMO+1 (7.5%)  | 2.6881, 461.23 | 0.0000 |

**Table S22.** Calculated MO energies of orbitals involved in transitions for co-system **1•5**.

| Orbital | Energy/<br>eV | Orbital | Energy/<br>eV |
|---------|---------------|---------|---------------|
|         |               |         |               |

|                                                                                                   |       |                                                                                                     |       |
|---------------------------------------------------------------------------------------------------|-------|-----------------------------------------------------------------------------------------------------|-------|
| 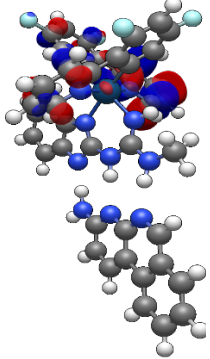 <p>LUMO+5</p>   | -0.67 |  <p>HOMO</p>     | -4.65 |
|  <p>LUMO+4</p>   | -0.81 |  <p>HOMO-1</p>    | -4.90 |
|  <p>LUMO+3</p> | -1.04 |  <p>HOMO-2</p> | -5.25 |
|  <p>LUMO+2</p> | -1.24 |  <p>HOMO-3</p> | -5.53 |

|                                                                                                 |       |                                                                                                     |       |
|-------------------------------------------------------------------------------------------------|-------|-----------------------------------------------------------------------------------------------------|-------|
| 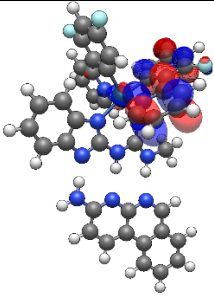 <p>LUMO+1</p> | -1.39 |  <p>HOMO-4</p>   | -5.61 |
|  <p>LUMO</p>   | -1.88 |  <p>HOMO-5</p>    | -5.83 |
|                                                                                                 |       |  <p>HOMO-6</p>  | -6.01 |
|                                                                                                 |       |  <p>HOMO-7</p> | -6.10 |

|  |  |                                                                                                |       |
|--|--|------------------------------------------------------------------------------------------------|-------|
|  |  | 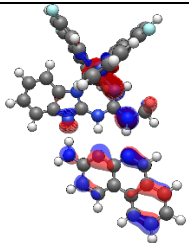<br>HOMO-11 | -6.87 |
|--|--|------------------------------------------------------------------------------------------------|-------|

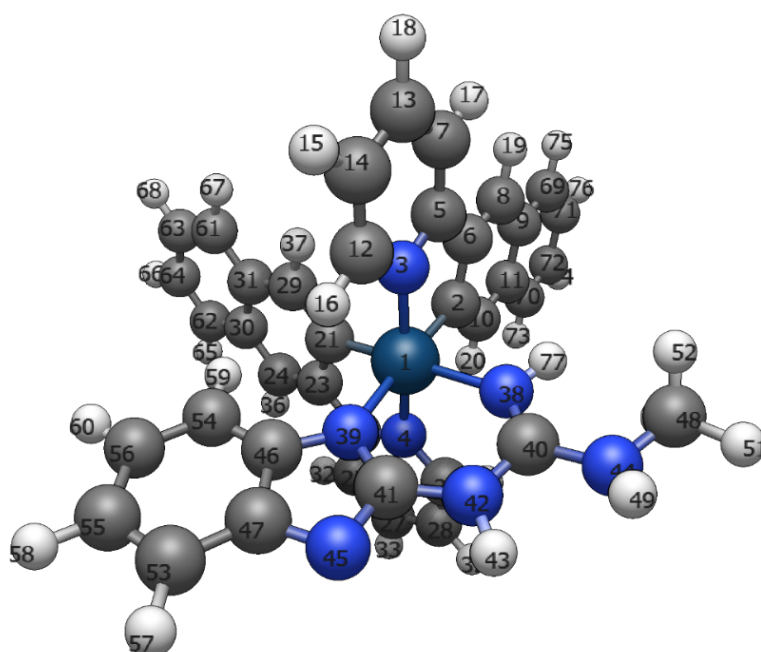

**Figure S94.** Optimised geometry model used for complex **2**. TD-DFT inputs and energy calculations were based upon this optimised input model.

**Table S23.** Cartesian coordinates for optimised compound **2**.

---

| Center | Atomic | Atomic | Coordinates (Angstroms) |   |   |
|--------|--------|--------|-------------------------|---|---|
| Number | Number | Type   | X                       | Y | Z |

---

|    |    |   |           |           |           |
|----|----|---|-----------|-----------|-----------|
| 1  | 77 | 0 | -0.044860 | -0.547501 | -0.020530 |
| 2  | 6  | 0 | 1.942868  | -0.151394 | 0.049686  |
| 3  | 7  | 0 | 0.237371  | -0.587249 | 2.027374  |
| 4  | 7  | 0 | -0.288474 | -0.341501 | -2.067748 |
| 5  | 6  | 0 | 1.518445  | -0.382879 | 2.459556  |
| 6  | 6  | 0 | 2.492101  | -0.158492 | 1.385176  |
| 7  | 6  | 0 | 1.795240  | -0.389494 | 3.833986  |
| 8  | 6  | 0 | 3.844828  | 0.034014  | 1.616497  |
| 9  | 6  | 0 | 4.743111  | 0.251003  | 0.546098  |
| 10 | 6  | 0 | 2.827801  | 0.064523  | -0.992367 |
| 11 | 6  | 0 | 4.220136  | 0.267563  | -0.789834 |
| 12 | 6  | 0 | -0.754363 | -0.786056 | 2.917262  |
| 13 | 6  | 0 | 0.773755  | -0.598104 | 4.752169  |
| 14 | 6  | 0 | -0.528044 | -0.798875 | 4.287325  |
| 15 | 1  | 0 | -1.358550 | -0.957908 | 4.966566  |
| 16 | 1  | 0 | -1.739489 | -0.927191 | 2.489678  |
| 17 | 1  | 0 | 2.810529  | -0.222406 | 4.175105  |
| 18 | 1  | 0 | 0.988299  | -0.598747 | 5.817114  |
| 19 | 1  | 0 | 4.250316  | 0.023995  | 2.626152  |
| 20 | 1  | 0 | 2.462045  | 0.088539  | -2.017006 |
| 21 | 6  | 0 | -0.407740 | 1.441517  | -0.117933 |
| 22 | 6  | 0 | -0.612065 | 0.913772  | -2.503737 |
| 23 | 6  | 0 | -0.660210 | 1.928604  | -1.451506 |
| 24 | 6  | 0 | -0.913329 | 3.267800  | -1.702370 |
| 25 | 6  | 0 | -0.854948 | 1.133063  | -3.868180 |
| 26 | 6  | 0 | -0.200384 | -1.354724 | -2.950258 |
| 27 | 6  | 0 | -0.764746 | 0.086329  | -4.774329 |
| 28 | 6  | 0 | -0.426930 | -1.187067 | -4.308301 |
| 29 | 6  | 0 | -0.399450 | 2.379389  | 0.901011  |
| 30 | 6  | 0 | -0.921537 | 4.216405  | -0.655147 |
| 31 | 6  | 0 | -0.651518 | 3.759353  | 0.677708  |
| 32 | 1  | 0 | -1.119459 | 2.127558  | -4.207898 |
| 33 | 1  | 0 | -0.956609 | 0.257985  | -5.829583 |
| 34 | 1  | 0 | 0.065011  | -2.315090 | -2.527216 |
| 35 | 1  | 0 | -0.344942 | -2.036533 | -4.977817 |
| 36 | 1  | 0 | -1.106821 | 3.623670  | -2.711905 |
| 37 | 1  | 0 | -0.205939 | 2.069462  | 1.925453  |
| 38 | 7  | 0 | 0.451248  | -2.687468 | -0.067453 |
| 39 | 7  | 0 | -2.143065 | -1.258192 | 0.091349  |
| 40 | 6  | 0 | -0.314275 | -3.737854 | -0.155876 |
| 41 | 6  | 0 | -2.529648 | -2.548036 | -0.078474 |
| 42 | 7  | 0 | -1.663472 | -3.640456 | -0.278507 |
| 43 | 1  | 0 | -2.187840 | -4.482025 | -0.477711 |
| 44 | 7  | 0 | 0.164812  | -5.039526 | -0.216028 |
| 45 | 7  | 0 | -3.825360 | -2.826649 | -0.061238 |
| 46 | 6  | 0 | -3.367352 | -0.602126 | 0.251472  |

|    |   |   |           |           |           |
|----|---|---|-----------|-----------|-----------|
| 47 | 6 | 0 | -4.393113 | -1.586522 | 0.149755  |
| 48 | 6 | 0 | 1.580701  | -5.324414 | -0.044655 |
| 49 | 1 | 0 | -0.455950 | -5.728598 | 0.189438  |
| 50 | 1 | 0 | 2.161324  | -4.822037 | -0.825042 |
| 51 | 1 | 0 | 1.730541  | -6.400223 | -0.160232 |
| 52 | 1 | 0 | 1.974199  | -5.020768 | 0.937476  |
| 53 | 6 | 0 | -5.742444 | -1.229783 | 0.275159  |
| 54 | 6 | 0 | -3.686139 | 0.740897  | 0.490892  |
| 55 | 6 | 0 | -6.050037 | 0.107587  | 0.506563  |
| 56 | 6 | 0 | -5.033653 | 1.077286  | 0.614653  |
| 57 | 1 | 0 | -6.517520 | -1.987260 | 0.194571  |
| 58 | 1 | 0 | -7.089383 | 0.410899  | 0.608349  |
| 59 | 1 | 0 | -2.914799 | 1.496181  | 0.576773  |
| 60 | 1 | 0 | -5.303952 | 2.114403  | 0.798024  |
| 61 | 6 | 0 | -0.651259 | 4.715116  | 1.731325  |
| 62 | 6 | 0 | -1.178116 | 5.597443  | -0.879171 |
| 63 | 6 | 0 | -0.903583 | 6.045789  | 1.483073  |
| 64 | 6 | 0 | -1.170320 | 6.494735  | 0.163965  |
| 65 | 1 | 0 | -1.381977 | 5.933051  | -1.893916 |
| 66 | 1 | 0 | -1.368345 | 7.547680  | -0.017317 |
| 67 | 1 | 0 | -0.447965 | 4.373593  | 2.743884  |
| 68 | 1 | 0 | -0.899993 | 6.761275  | 2.301518  |
| 69 | 6 | 0 | 6.136540  | 0.451114  | 0.749913  |
| 70 | 6 | 0 | 5.123621  | 0.487735  | -1.865869 |
| 71 | 6 | 0 | 6.982697  | 0.660579  | -0.315085 |
| 72 | 6 | 0 | 6.468114  | 0.679137  | -1.636746 |
| 73 | 1 | 0 | 4.730711  | 0.505309  | -2.880053 |
| 74 | 1 | 0 | 7.143218  | 0.847738  | -2.471885 |
| 75 | 1 | 0 | 6.523235  | 0.438258  | 1.766914  |
| 76 | 1 | 0 | 8.045375  | 0.814405  | -0.148332 |
| 77 | 1 | 0 | 1.428948  | -2.899927 | 0.095051  |

---

**Energy**

E(RB3LYP) = -1992.30960801 Hartree

Zero point corrected free energy = -1991.700309 Hartree

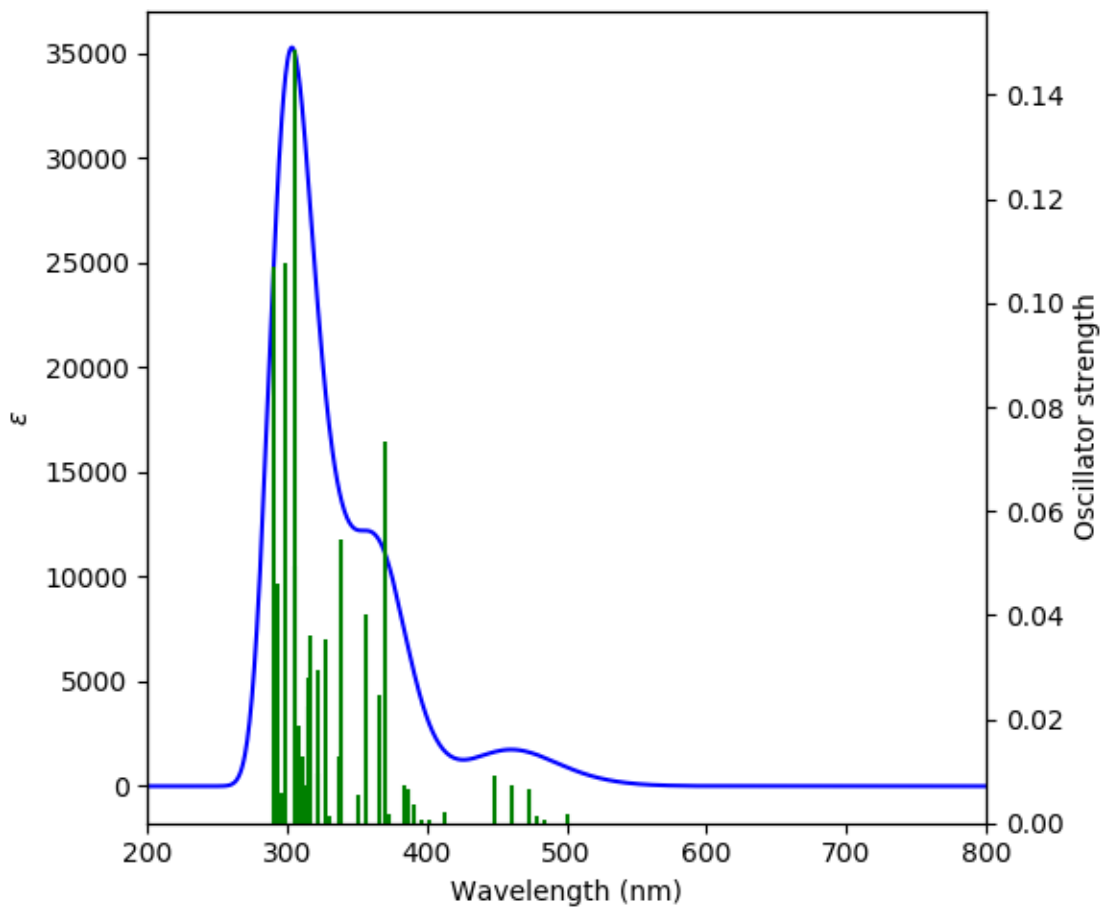

**Figure S95.** Calculated UV/vis spectrum for complex **2**.

**Table S24.** Calculated energy levels of the ten highest contributing singlet states and the first five triplet states for complex **2**.

| Spin State      | Transition configurations                     | Excitation energy<br>(eV, nm) | Oscillator strength |
|-----------------|-----------------------------------------------|-------------------------------|---------------------|
| S <sub>5</sub>  | HOMO-1→LUMO+1 (95.8%)<br>HOMO-2→LUMO+1 (2.8%) | 2.6918, 460.60                | 0.0073              |
| S <sub>6</sub>  | HOMO-2→LUMO+1 (94.7%)                         | 2.7698, 447.62                | 0.0090              |
| S <sub>14</sub> | HOMO-4→LUMO (73.0%)                           | 3.3556, 369.49                | 0.0733              |

|                 |                                                                                                                                                                                               |                |         |
|-----------------|-----------------------------------------------------------------------------------------------------------------------------------------------------------------------------------------------|----------------|---------|
|                 | HOMO-6→LUMO (6.6%)<br>HOMO-5→LUMO (5.3%)<br>HOMO-4→LUMO (4.0%)<br>HOMO-2→LUMO+3 (3.5%)                                                                                                        |                |         |
| S <sub>15</sub> | HOMO-3→LUMO+1 (79.2%)<br>HOMO-4→LUMO+1 (11.8%)<br>HOMO-2→LUMO+3 (3.3%)                                                                                                                        | 3.3929, 365.43 | 0.0245  |
| S <sub>16</sub> | HOMO-4→LUMO+1 (56.7%)<br>HOMO-5→LUMO+1 (16.8%)<br>HOMO-6→LUMO+1 (5.2%)<br>HOMO-5→LUMO (2.1%)<br>HOMO-3→LUMO+1 (9.3%)                                                                          | 3.4764, 356.65 | 0.0403  |
| S <sub>23</sub> | HOMO→LUMO+4 (78.6%)<br>HOMO-1→LUMO+4 (6.0%)<br>HOMO-3→LUMO+3 (4.7%)<br>HOMO-6→LUMO+1 (2.9%)                                                                                                   | 3.8565, 321.49 | 0.0094  |
| S <sub>24</sub> | HOMO-4→LUMO+2 (30.2%)<br>HOMO-7→LUMO (17.4%)<br>HOMO-3→LUMO+3 (12.7%)<br>HOMO-4→LUMO+3 (9.9%)<br>HOMO-2→LUMO+4 (6.0%)<br>HOMO-7→LUMO+1 (3.7%)<br>HOMO-6→LUMO+2 (2.5%)<br>HOMO-1→LUMO+4 (6.5%) | 3.9221, 316.12 | 0.00359 |
| S <sub>27</sub> | HOMO→LUMO+5 (65.9%)                                                                                                                                                                           | 3.9741, 311.98 | 0.0072  |



|                 |                                                                                                                                                                                                                      |                |        |
|-----------------|----------------------------------------------------------------------------------------------------------------------------------------------------------------------------------------------------------------------|----------------|--------|
|                 | HOMO-7→LUMO+1 (18.1%)<br>HOMO-1→LUMO+5 (4.0%)<br>HOMO-6→LUMO+1 (2.2%)<br>HOMO-2→LUMO+4 (4.0%)                                                                                                                        |                |        |
| S <sub>30</sub> | HOMO-1→LUMO+5 (66.7%)<br>HOMO-2→LUMO+4 (19.0%)<br>HOMO-5→LUMO+2 (2.6%)<br>HOMO-2→LUMO+5 (2.4%)<br>HOMO-7→LUMO (2.7%)                                                                                                 | 4.0581, 305.52 | 0.0492 |
| S <sub>31</sub> | HOMO-2→LUMO+4 (37.8%)<br>HOMO-7→LUMO+1 (19.4%)<br>HOMO-7→LUMO (3.9%)<br>HOMO-5→LUMO+3 (7.1%)<br>HOMO-1→LUMO+5 (15.2%)                                                                                                | 4.0660, 304.93 | 0.1488 |
| T <sub>1</sub>  | HOMO-2→LUMO+1 (36.6%)<br>HOMO-2→LUMO (9.5%)<br>HOMO-4→LUMO+1 (5.6%)<br>HOMO-3→LUMO+5 (2.6%)<br>HOMO-3→LUMO+3 (2.6%)<br>HOMO-2→LUMO+3 (3.0%)<br>HOMO-1→LUMO+1 (4.8%)<br>HOMO-2→LUMO+5 (5.3%)<br>HOMO+3→LUMO+1 (18.1%) | 2.2828, 543.13 | 0.0000 |
| T <sub>2</sub>  | HOMO-3→LUMO (28.8%)<br>HOMO-2→LUMO (21.7%)                                                                                                                                                                           | 2.3250, 533.27 | 0.0000 |

|                |                                                                                                                                         |                |        |
|----------------|-----------------------------------------------------------------------------------------------------------------------------------------|----------------|--------|
|                | HOMO-4→LUMO (16.2%)<br>HOMO-3→LUMO+2 (3.4%)<br>HOMO-7→LUMO (3.8%)<br>HOMO-2→LUMO+1 (4.6%)<br>HOMO-3→LUMO+4 (4.6%)                       |                |        |
| T <sub>3</sub> | HOMO→LUMO (61.2%)<br>HOMO-1→LUMO (15.0%)<br>HOMO-4→LUMO (4.2%)<br>HOMO-5→LUMO (2.2%)<br>HOMO-2→LUMO (11.1%)                             | 2.4445, 507.19 | 0.0000 |
| T <sub>4</sub> | HOMO-1→LUMO (53.0%)<br>HOMO→LUMO+1 (3.3%)<br>HOMO-2→LUMO (5.3%)<br>HOMO→LUMO (30.9%)                                                    | 2.5492, 486.36 | 0.0000 |
| T <sub>5</sub> | HOMO→LUMO+1 (71.4%)<br>HOMO-1→LUMO (7.9%)<br>HOMO-1→LUMO+1 (6.2%)<br>HOMO-4→LUMO+1 (3.9%)<br>HOMO-2→LUMO (2.6%)<br>HOMO-3→LUMO+1 (2.5%) | 2.5831, 479.98 | 0.0000 |

**Table S25.** Calculated MO energies of orbitals involved in transitions for **2**.

| Orbital | Energy/<br>eV | Orbital | Energy/<br>eV |
|---------|---------------|---------|---------------|
|         |               |         |               |

|        |                                                                                     |       |        |                                                                                      |       |
|--------|-------------------------------------------------------------------------------------|-------|--------|--------------------------------------------------------------------------------------|-------|
| LUMO+5 | 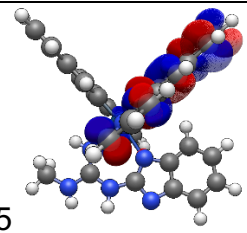   | -0.09 | HOMO   |    | -4.57 |
| LUMO+4 |    | -0.29 | HOMO-1 |    | -4.70 |
| LUMO+3 |   | -0.90 | HOMO-2 |   | -4.86 |
| LUMO+2 |  | -1.05 | HOMO-3 |  | -5.35 |
| LUMO+1 |  | -1.45 | HOMO-4 |  | -5.53 |

|                                                                                               |       |                                                                                                   |       |
|-----------------------------------------------------------------------------------------------|-------|---------------------------------------------------------------------------------------------------|-------|
| 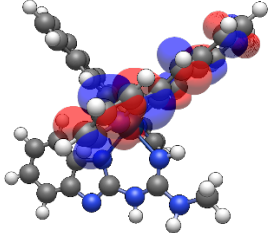 <p>LUMO</p> | -1.62 |  <p>HOMO-5</p>  | -5.78 |
|                                                                                               |       |  <p>HOMO-6</p>  | -5.91 |
|                                                                                               |       |  <p>HOMO-7</p> | -5.97 |

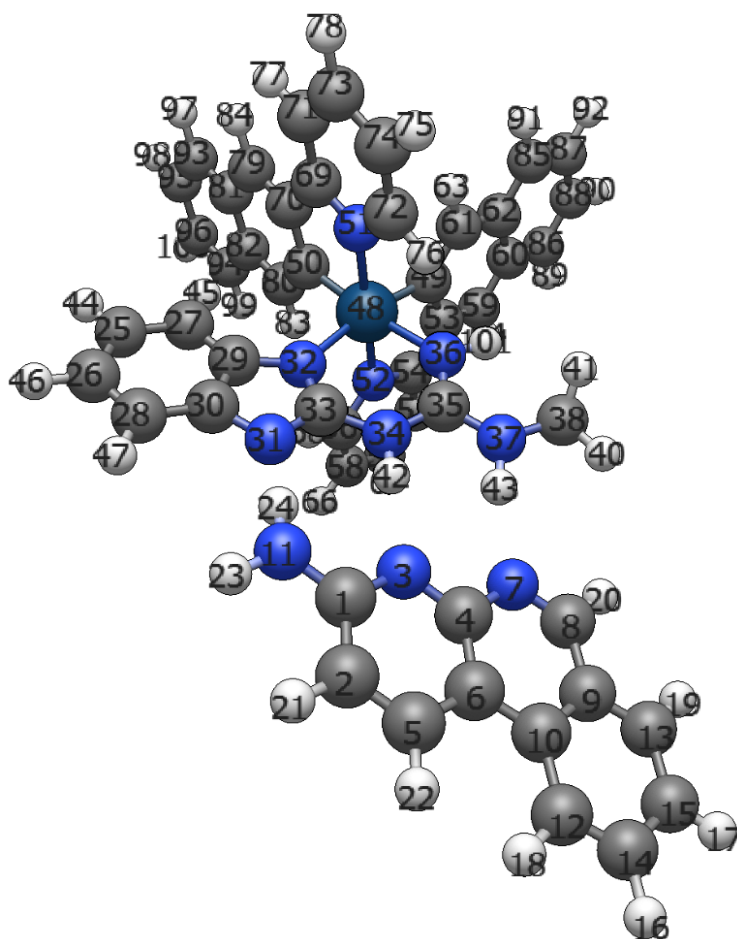

**Figure S96.** Optimised geometry model used for co-system **2•5**. TD-DFT inputs and energy calculations were based upon this optimised input model.

**Table S26.** Cartesian coordinates for optimised co-system **2•5**.

---

| Center Number | Atomic Number | Atomic Type | Coordinates (Angstroms) |           |          |
|---------------|---------------|-------------|-------------------------|-----------|----------|
|               |               |             | X                       | Y         | Z        |
| 1             | 6             | 0           | 5.535550                | -2.532351 | 0.495821 |
| 2             | 6             | 0           | 6.922370                | -2.896401 | 0.434311 |
| 3             | 7             | 0           | 5.141440                | -1.256691 | 0.352381 |
| 4             | 6             | 0           | 6.076890                | -0.308071 | 0.132491 |
| 5             | 6             | 0           | 7.861140                | -1.931301 | 0.203471 |
| 6             | 6             | 0           | 7.470340                | -0.576231 | 0.033851 |
| 7             | 7             | 0           | 5.579120                | 0.975639  | 0.005131 |

|     |    |   |           |           |           |
|-----|----|---|-----------|-----------|-----------|
| 8   | 6  | 0 | 6.412970  | 1.952629  | -0.233499 |
| 9   | 6  | 0 | 7.827360  | 1.811679  | -0.370319 |
| 10  | 6  | 0 | 8.381190  | 0.507849  | -0.226199 |
| 11  | 7  | 0 | 4.595410  | -3.471211 | 0.723741  |
| 12  | 6  | 0 | 9.786020  | 0.368229  | -0.352559 |
| 13  | 6  | 0 | 8.661910  | 2.923079  | -0.631729 |
| 14  | 6  | 0 | 10.583840 | 1.467159  | -0.608199 |
| 15  | 6  | 0 | 10.025980 | 2.757159  | -0.750439 |
| 16  | 1  | 0 | 11.658670 | 1.336569  | -0.701629 |
| 17  | 1  | 0 | 10.670140 | 3.607999  | -0.951289 |
| 18  | 1  | 0 | 10.247610 | -0.608401 | -0.250119 |
| 19  | 1  | 0 | 8.210540  | 3.906999  | -0.736879 |
| 20  | 1  | 0 | 5.981130  | 2.950199  | -0.332209 |
| 21  | 1  | 0 | 7.208200  | -3.936151 | 0.565671  |
| 22  | 1  | 0 | 8.909090  | -2.209301 | 0.148531  |
| 23  | 1  | 0 | 4.874760  | -4.440951 | 0.708091  |
| 24  | 1  | 0 | 3.585830  | -3.260711 | 0.565281  |
| 25  | 6  | 0 | -1.598610 | -5.140271 | -0.417719 |
| 26  | 6  | 0 | -0.394510 | -5.860851 | -0.309209 |
| 27  | 6  | 0 | -1.628850 | -3.749191 | -0.318449 |
| 28  | 6  | 0 | 0.815500  | -5.203411 | -0.102849 |
| 29  | 6  | 0 | -0.417920 | -3.079751 | -0.104629 |
| 30  | 6  | 0 | 0.799370  | -3.806811 | -0.002439 |
| 31  | 7  | 0 | 1.837540  | -2.919061 | 0.191721  |
| 32  | 7  | 0 | -0.109790 | -1.723101 | 0.025351  |
| 33  | 6  | 0 | 1.235960  | -1.727041 | 0.197561  |
| 34  | 7  | 0 | 2.054690  | -0.600341 | 0.327531  |
| 35  | 6  | 0 | 1.710510  | 0.687149  | 0.628361  |
| 36  | 7  | 0 | 0.460400  | 1.065279  | 0.745611  |
| 37  | 7  | 0 | 2.768940  | 1.524739  | 0.828381  |
| 38  | 6  | 0 | 2.593090  | 2.947389  | 1.026361  |
| 39  | 1  | 0 | 2.084430  | 3.440549  | 0.183521  |
| 40  | 1  | 0 | 3.582110  | 3.396979  | 1.140931  |
| 41  | 1  | 0 | 2.025600  | 3.160059  | 1.941921  |
| 42  | 1  | 0 | 3.054850  | -0.827251 | 0.347331  |
| 43  | 1  | 0 | 3.700740  | 1.218039  | 0.527491  |
| 44  | 1  | 0 | -2.528550 | -5.677730 | -0.585989 |
| 45  | 1  | 0 | -2.560750 | -3.207620 | -0.415259 |
| 46  | 1  | 0 | -0.410451 | -6.945001 | -0.391699 |
| 47  | 1  | 0 | 1.750370  | -5.753241 | -0.024229 |
| r48 | 77 | 0 | -1.392330 | 0.082799  | 0.139141  |
| 49  | 6  | 0 | -2.290690 | 1.899530  | 0.145341  |
| 50  | 6  | 0 | -3.200340 | -0.752220 | -0.246969 |
| 51  | 7  | 0 | -1.934770 | -0.461500 | 2.059251  |
| 52  | 7  | 0 | -1.023450 | 0.649029  | -1.813979 |
| 53  | 6  | 0 | -2.167710 | 2.614830  | -1.102969 |

|    |   |   |           |           |           |
|----|---|---|-----------|-----------|-----------|
| 54 | 6 | 0 | -1.478150 | 1.887289  | -2.173639 |
| 55 | 6 | 0 | -1.275080 | 2.347399  | -3.482429 |
| 56 | 6 | 0 | -0.389600 | -0.125811 | -2.715359 |
| 57 | 6 | 0 | -0.618010 | 1.550009  | -4.410729 |
| 58 | 6 | 0 | -0.166310 | 0.286609  | -4.022119 |
| 59 | 6 | 0 | -2.668600 | 3.897040  | -1.259079 |
| 60 | 6 | 0 | -3.326470 | 4.557060  | -0.195169 |
| 61 | 6 | 0 | -2.936770 | 2.551370  | 1.181521  |
| 62 | 6 | 0 | -3.463400 | 3.865760  | 1.054331  |
| 63 | 1 | 0 | -3.061460 | 2.053840  | 2.141201  |
| 64 | 1 | 0 | -2.568010 | 4.429570  | -2.202609 |
| 65 | 1 | 0 | -1.641270 | 3.327379  | -3.766409 |
| 66 | 1 | 0 | 0.347270  | -0.373341 | -4.712889 |
| 67 | 1 | 0 | -0.463910 | 1.906129  | -5.425419 |
| 68 | 1 | 0 | -0.070550 | -1.093661 | -2.348589 |
| 69 | 6 | 0 | -3.159750 | -1.055320 | 2.188711  |
| 70 | 6 | 0 | -3.897640 | -1.205690 | 0.933261  |
| 71 | 6 | 0 | -3.597140 | -1.470850 | 3.455261  |
| 72 | 6 | 0 | -1.151340 | -0.290691 | 3.141061  |
| 73 | 6 | 0 | -2.791680 | -1.286920 | 4.570471  |
| 74 | 6 | 0 | -1.540160 | -0.685651 | 4.412891  |
| 75 | 1 | 0 | -0.873450 | -0.527431 | 5.253811  |
| 76 | 1 | 0 | -0.196240 | 0.181339  | 2.945311  |
| 77 | 1 | 0 | -4.566940 | -1.944350 | 3.554631  |
| 78 | 1 | 0 | -3.131250 | -1.612230 | 5.549721  |
| 79 | 6 | 0 | -5.165910 | -1.759690 | 0.863761  |
| 80 | 6 | 0 | -3.862470 | -0.890390 | -1.455379 |
| 81 | 6 | 0 | -5.831730 | -1.902420 | -0.374789 |
| 82 | 6 | 0 | -5.160970 | -1.456070 | -1.562019 |
| 83 | 1 | 0 | -3.385960 | -0.563800 | -2.377119 |
| 84 | 1 | 0 | -5.681420 | -2.098580 | 1.759851  |
| 85 | 6 | 0 | -4.124980 | 4.529560  | 2.123991  |
| 86 | 6 | 0 | -3.850540 | 5.873030  | -0.322839 |
| 87 | 6 | 0 | -4.622690 | 5.804550  | 1.969871  |
| 88 | 6 | 0 | -4.484870 | 6.486090  | 0.733711  |
| 89 | 1 | 0 | -3.742780 | 6.388350  | -1.275169 |
| 90 | 1 | 0 | -4.883260 | 7.491250  | 0.624971  |
| 91 | 1 | 0 | -4.233940 | 4.007710  | 3.072211  |
| 92 | 1 | 0 | -5.126820 | 6.295140  | 2.798691  |
| 93 | 6 | 0 | -7.132700 | -2.467590 | -0.480669 |
| 94 | 6 | 0 | -5.830770 | -1.599830 | -2.808819 |
| 95 | 6 | 0 | -7.751360 | -2.591030 | -1.703649 |
| 96 | 6 | 0 | -7.090430 | -2.151510 | -2.879539 |
| 97 | 1 | 0 | -7.632090 | -2.802470 | 0.426281  |
| 98 | 1 | 0 | -8.745290 | -3.024700 | -1.773889 |
| 99 | 1 | 0 | -5.326090 | -1.263980 | -3.712049 |

|     |   |   |           |           |           |
|-----|---|---|-----------|-----------|-----------|
| 100 | 1 | 0 | -7.585780 | -2.253340 | -3.841919 |
| 101 | 1 | 0 | 0.356630  | 2.056629  | 0.928311  |

---

**Energy**

E(RB3LYP) = -2619.31957086 Hartree

Zero point corrected free energy = -2618.520431 Hartree

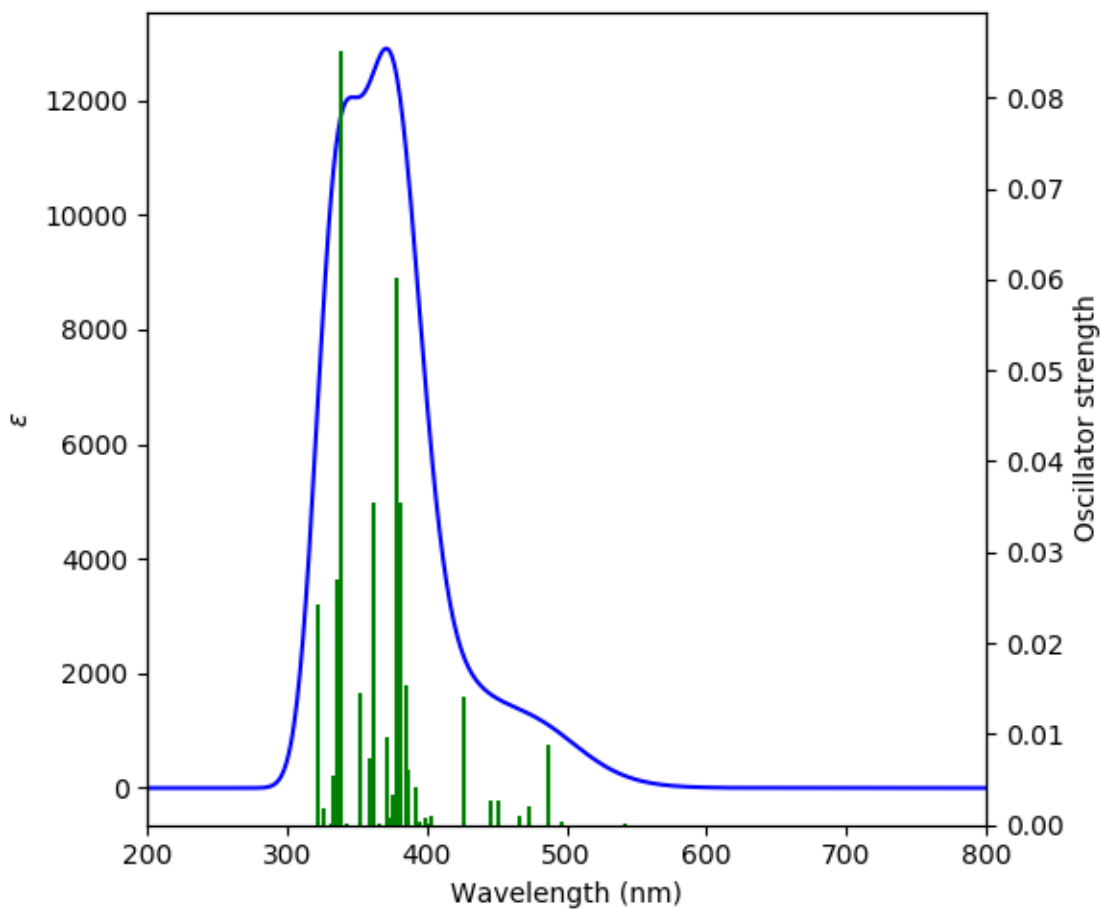

**Figure S97.** Calculated UV/vis spectrum for co-system **2•5**.

**Table S27.** Calculated energy levels of the ten highest contributing singlet states and the first four triplet states for co-system **2•5**.



| Spin State      | Transition configurations                                                                                            | Excitation energy<br>(eV, nm) | Oscillator strength |
|-----------------|----------------------------------------------------------------------------------------------------------------------|-------------------------------|---------------------|
| S <sub>3</sub>  | HOMO→LUMO+1 (57.3%)<br>HOMO-1→LUMO+1 (38.1%)                                                                         | 2.5489, 486.43                | 0.0088              |
| S <sub>7</sub>  | HOMO-1→LUMO+2 (66.1%)<br>HOMO→LUMO+2 (18.7%)<br>HOMO-2→LUMO+1 (6.2%)<br>HOMO-2→LUMO+2 (5.2%)                         | 2.7448, 451.71                | 0.0026              |
| S <sub>9</sub>  | HOMO-2→LUMO+2 (91.7%)<br>HOMO-1→LUMO+2 (5.0%)                                                                        | 2.9039, 426.95                | 0.0141              |
| S <sub>15</sub> | HOMO→LUMO+5 (58.1%)<br>HOMO-4→LUMO+1 (23.9%)<br>HOMO-5→LUMO+1 (2.6%)<br>HOMO-1→LUMO+4 (2.4%)<br>HOMO-1→LUMO+5 (5.2%) | 3.2108, 386.14                | 0.0060              |
| S <sub>18</sub> | HOMO-6→LUMO (96.6%)                                                                                                  | 3.2772, 378.33                | 0.0602              |
| S <sub>19</sub> | HOMO-1→LUMO+3 (59.9%)<br>HOMO-2→LUMO+4 (16.6%)<br>HOMO-1→LUMO+5 (9.7%)<br>HOMO-2→LUMO+3 (7.1%)                       | 3.3031, 375.36                | 0.0034              |
| S <sub>24</sub> | HOMO-3→LUMO+2 (74.6%)<br>HOMO-1→LUMO+5 (2.5%)<br>HOMO-5→LUMO+2 (5.0%)<br>HOMO-4→LUMO+2 (11.6%)                       | 3.4238, 362.12                | 0.0355              |
| S <sub>26</sub> | HOMO-2→LUMO+5 (90.2%)                                                                                                | 3.4577, 358.57                | 0.0074              |

|                 |                                                                                                                                                                                                                                                                                                |                |        |
|-----------------|------------------------------------------------------------------------------------------------------------------------------------------------------------------------------------------------------------------------------------------------------------------------------------------------|----------------|--------|
|                 | HOMO-1→LUMO+5 (4.0%)                                                                                                                                                                                                                                                                           |                |        |
| S <sub>29</sub> | HOMO-5→LUMO+2 (68.0%)<br>HOMO-1→LUMO+8 (2.6%)<br>HOMO-4→LUMO+2 (6.1%)<br>HOMO-8→LUMO+2 (7.5%)<br>HOMO-7→LUMO+2 (7.5%)                                                                                                                                                                          | 3.6637, 338.41 | 0.0852 |
| S <sub>32</sub> | HOMO-8→LUMO+1 (44.6%)<br>HOMO-4→LUMO+4 (37.8%)<br>HOMO-5→LUMO+1 (5.0%)<br>HOMO-4→LUMO+1 (2.1%)                                                                                                                                                                                                 | 3.7277, 332.60 | 0.0055 |
| T <sub>1</sub>  | HOMO-5→LUMO+2 (2.1%)<br>HOMO-4→LUMO+1 (2.9%)<br>HOMO-4→LUMO+2 (3.2%)<br>HOMO-3→LUMO+2 (14.5%)<br>HOMO-3→LUMO+5 (2.1%)<br>HOMO-3→LUMO+8 (2.1%)<br>HOMO-2→LUMO+1 (6.0%)<br>HOMO-2→LUMO+2 (14.1%)<br>HOMO-1→LUMO+1 (15.0%)<br>HOMO-1→LUMO+2 (15.6%)<br>HOMO-1→LUMO+8 (2.3%)<br>HOMO→LUMO+1 (3.5%) | 2.2824, 543.21 | 0.0000 |
| T <sub>2</sub>  | HOMO→LUMO (98.1%)                                                                                                                                                                                                                                                                              | 2.2864, 542.26 | 0.0000 |
| T <sub>3</sub>  | HOMO-7→LUMO+1 (3.5%)<br>HOMO-5→LUMO+1 (2.1%)                                                                                                                                                                                                                                                   | 2.3181, 534.86 | 0.0000 |

|                |                                                                                                                                                                                                                      |                |        |
|----------------|----------------------------------------------------------------------------------------------------------------------------------------------------------------------------------------------------------------------|----------------|--------|
|                | HOMO-4→LUMO+1 (5.1%)<br>HOMO-4→LUMO+2 (3.0%)<br>HOMO-3→LUMO+1 (28.6%)<br>HOMO-3→LUMO+4 (3.0%)<br>HOMO-3→LUMO+7 (3.7%)<br>HOMO-2→LUMO+2 (6.1%)<br>HOMO-1→LUMO+1 (11.0%)<br>HOMO-1→LUMO+2 (8.8%)<br>HOMO→LUMO+1 (7.2%) |                |        |
| T <sub>4</sub> | HOMO-1→LUMO (61.9%)<br>HOMO-6→LUMO (25.6%)<br>HOMO-2→LUMO (8.2%)                                                                                                                                                     | 2.4779, 500.37 | 0.0000 |

**Table S28.** Calculated MO energies of orbitals involved in transitions for co-system **2•5**.

| Orbital                                                                                       | Energy/<br>eV | Orbital                                                                                       | Energy/<br>eV |
|-----------------------------------------------------------------------------------------------|---------------|-----------------------------------------------------------------------------------------------|---------------|
| 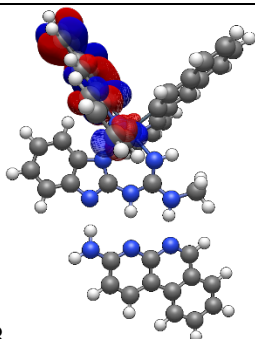<br>LUMO+8 | 0.05          | <br>HOMO | -4.52         |

|                                                                                                   |       |                                                                                                     |       |
|---------------------------------------------------------------------------------------------------|-------|-----------------------------------------------------------------------------------------------------|-------|
| 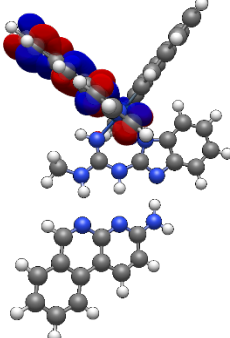 <p>LUMO+7</p>   | -0.13 |  <p>HOMO-1</p>    | -4.66 |
|  <p>LUMO+6</p>   | -0.39 |  <p>HOMO-2</p>   | -4.78 |
|  <p>LUMO+5</p> | -0.74 |  <p>HOMO-3</p> | -5.22 |
|  <p>LUMO+4</p> | -0.89 |  <p>HOMO-4</p>  | -5.32 |

|                                                                                                  |       |                                                                                                     |       |
|--------------------------------------------------------------------------------------------------|-------|-----------------------------------------------------------------------------------------------------|-------|
| 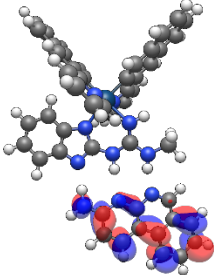 <p>LUMO+3</p>  | -1.05 |  <p>HOMO-5</p>    | -5.52 |
|  <p>LUMO+2</p>  | -1.30 |  <p>HOMO-6</p>   | -5.62 |
|  <p>LUMO+1</p> | -1.45 |  <p>HOMO-7</p>  | -5.76 |
|  <p>LUMO</p>  | -1.85 |  <p>HOMO-8</p> | -5.81 |

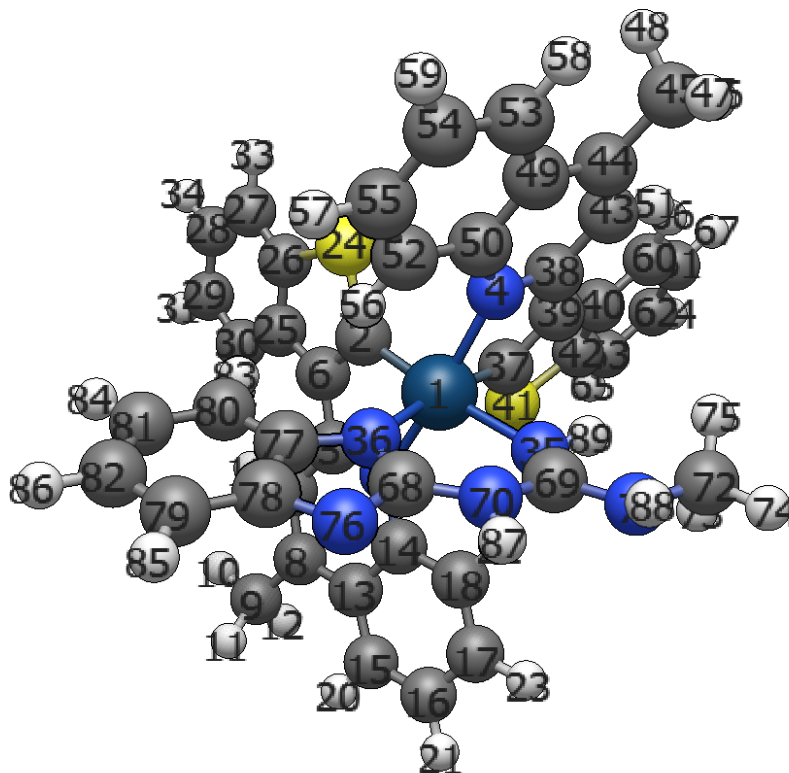

**Figure S98.** Optimised geometry model used for complex **3**. TD-DFT inputs and energy calculations were based upon this optimised input model.

**Table S29.** Cartesian coordinates for optimised compound **3**.

| Center Number | Atomic Number | Atomic Type | Coordinates (Angstroms) |           |           |
|---------------|---------------|-------------|-------------------------|-----------|-----------|
|               |               |             | X                       | Y         | Z         |
| 1             | 77            | 0           | 0.106354                | -0.069980 | -0.284289 |
| 2             | 6             | 0           | -0.614337               | 0.347164  | 1.510648  |
| 3             | 7             | 0           | -1.744078               | 0.949992  | -0.737256 |
| 4             | 7             | 0           | 1.972996                | -0.811893 | 0.450490  |
| 5             | 6             | 0           | -2.434729               | 1.333792  | 0.370459  |
| 6             | 6             | 0           | -1.803772               | 1.049336  | 1.638284  |
| 7             | 6             | 0           | -3.710004               | 1.940307  | 0.250127  |
| 8             | 6             | 0           | -4.310493               | 2.172185  | -0.960603 |
| 9             | 6             | 0           | -5.684093               | 2.803732  | -0.978536 |
| 10            | 1             | 0           | -6.394215               | 2.180180  | -0.423175 |
| 11            | 1             | 0           | -6.088132               | 2.948312  | -1.980882 |
| 12            | 1             | 0           | -5.658209               | 3.783602  | -0.487476 |

|    |    |   |           |           |           |
|----|----|---|-----------|-----------|-----------|
| 13 | 6  | 0 | -3.588226 | 1.800495  | -2.137574 |
| 14 | 6  | 0 | -2.293809 | 1.196904  | -1.980135 |
| 15 | 6  | 0 | -4.092584 | 2.006017  | -3.447167 |
| 16 | 6  | 0 | -3.366777 | 1.657058  | -4.564899 |
| 17 | 6  | 0 | -2.087028 | 1.090358  | -4.405821 |
| 18 | 6  | 0 | -1.567307 | 0.867842  | -3.148272 |
| 19 | 1  | 0 | -4.236170 | 2.207980  | 1.155195  |
| 20 | 1  | 0 | -5.072792 | 2.451787  | -3.572277 |
| 21 | 1  | 0 | -3.774825 | 1.824272  | -5.557482 |
| 22 | 1  | 0 | -0.581533 | 0.448882  | -3.022554 |
| 23 | 1  | 0 | -1.501514 | 0.823210  | -5.281878 |
| 24 | 16 | 0 | 0.103248  | 0.000784  | 3.058882  |
| 25 | 6  | 0 | -2.183506 | 1.325349  | 3.021239  |
| 26 | 6  | 0 | -1.217336 | 0.792255  | 3.917514  |
| 27 | 6  | 0 | -1.327804 | 0.908601  | 5.303530  |
| 28 | 6  | 0 | -2.426599 | 1.576424  | 5.835967  |
| 29 | 6  | 0 | -3.391871 | 2.122340  | 4.979074  |
| 30 | 6  | 0 | -3.276711 | 2.005180  | 3.596904  |
| 31 | 1  | 0 | -4.245955 | 2.649142  | 5.396401  |
| 32 | 1  | 0 | -4.044285 | 2.457998  | 2.981636  |
| 33 | 1  | 0 | -0.566748 | 0.484865  | 5.952956  |
| 34 | 1  | 0 | -2.531653 | 1.677254  | 6.912570  |
| 35 | 7  | 0 | 1.107100  | -0.527659 | -2.198635 |
| 36 | 7  | 0 | -1.011067 | -1.945953 | -0.698163 |
| 37 | 6  | 0 | 1.183562  | 1.580856  | -0.223993 |
| 38 | 6  | 0 | 2.960391  | 0.120069  | 0.376008  |
| 39 | 6  | 0 | 2.536872  | 1.472440  | 0.061127  |
| 40 | 6  | 0 | 3.253222  | 2.743901  | 0.027143  |
| 41 | 16 | 0 | 0.726612  | 3.221505  | -0.585580 |
| 42 | 6  | 0 | 2.373419  | 3.801506  | -0.331795 |
| 43 | 6  | 0 | 4.313196  | -0.259111 | 0.560436  |
| 44 | 6  | 0 | 4.681914  | -1.536980 | 0.905842  |
| 45 | 6  | 0 | 6.152977  | -1.847655 | 1.065805  |
| 46 | 1  | 0 | 6.705512  | -1.533682 | 0.172635  |
| 47 | 1  | 0 | 6.362303  | -2.906109 | 1.223518  |
| 48 | 1  | 0 | 6.569649  | -1.294219 | 1.915751  |
| 49 | 6  | 0 | 3.641392  | -2.494535 | 1.114844  |
| 50 | 6  | 0 | 2.284152  | -2.088521 | 0.871354  |
| 51 | 1  | 0 | 5.081016  | 0.484261  | 0.393356  |
| 52 | 6  | 0 | 1.248822  | -3.023749 | 1.111380  |
| 53 | 6  | 0 | 3.888442  | -3.821998 | 1.552561  |
| 54 | 6  | 0 | 2.859439  | -4.713189 | 1.763451  |
| 55 | 6  | 0 | 1.528262  | -4.301482 | 1.548287  |
| 56 | 1  | 0 | 0.227107  | -2.714797 | 0.957723  |
| 57 | 1  | 0 | 0.707779  | -4.988990 | 1.732164  |
| 58 | 1  | 0 | 4.908297  | -4.136427 | 1.744460  |

|    |   |   |           |           |           |
|----|---|---|-----------|-----------|-----------|
| 59 | 1 | 0 | 3.071734  | -5.721773 | 2.106274  |
| 60 | 6 | 0 | 4.591381  | 3.090924  | 0.306998  |
| 61 | 6 | 0 | 5.015957  | 4.412454  | 0.203935  |
| 62 | 6 | 0 | 4.129036  | 5.430233  | -0.173527 |
| 63 | 6 | 0 | 2.796707  | 5.127099  | -0.438003 |
| 64 | 1 | 0 | 4.476689  | 6.456731  | -0.249210 |
| 65 | 1 | 0 | 2.094443  | 5.909284  | -0.713019 |
| 66 | 1 | 0 | 5.303573  | 2.344788  | 0.636456  |
| 67 | 1 | 0 | 6.050181  | 4.657542  | 0.430585  |
| 68 | 6 | 0 | -0.834549 | -2.735898 | -1.787816 |
| 69 | 6 | 0 | 1.035205  | -1.562708 | -2.989656 |
| 70 | 7 | 0 | 0.108827  | -2.537330 | -2.811345 |
| 71 | 7 | 0 | 1.871973  | -1.741890 | -4.064376 |
| 72 | 6 | 0 | 2.864912  | -0.770345 | -4.478298 |
| 73 | 1 | 0 | 2.412700  | 0.203133  | -4.710291 |
| 74 | 1 | 0 | 3.355376  | -1.142698 | -5.379622 |
| 75 | 1 | 0 | 3.635163  | -0.622715 | -3.709651 |
| 76 | 7 | 0 | -1.601515 | -3.807883 | -1.921124 |
| 77 | 6 | 0 | -2.046549 | -2.602823 | -0.023130 |
| 78 | 6 | 0 | -2.395678 | -3.748406 | -0.795603 |
| 79 | 6 | 0 | -3.408981 | -4.618664 | -0.372474 |
| 80 | 6 | 0 | -2.699364 | -2.336498 | 1.187268  |
| 81 | 6 | 0 | -3.705138 | -3.212641 | 1.594073  |
| 82 | 6 | 0 | -4.059780 | -4.337501 | 0.824981  |
| 83 | 1 | 0 | -2.441801 | -1.477286 | 1.792272  |
| 84 | 1 | 0 | -4.226143 | -3.019092 | 2.528455  |
| 85 | 1 | 0 | -3.669390 | -5.486152 | -0.972762 |
| 86 | 1 | 0 | -4.851138 | -4.995946 | 1.175240  |
| 87 | 1 | 0 | 0.041948  | -3.283121 | -3.490905 |
| 88 | 1 | 0 | 1.756981  | -2.572367 | -4.623661 |
| 89 | 1 | 0 | 1.854000  | 0.119595  | -2.424139 |

---

**Energy**

E(RB3LYP) = -3019.73818798 Hartree

Zero point corrected free energy = -3019.053476 Hartree



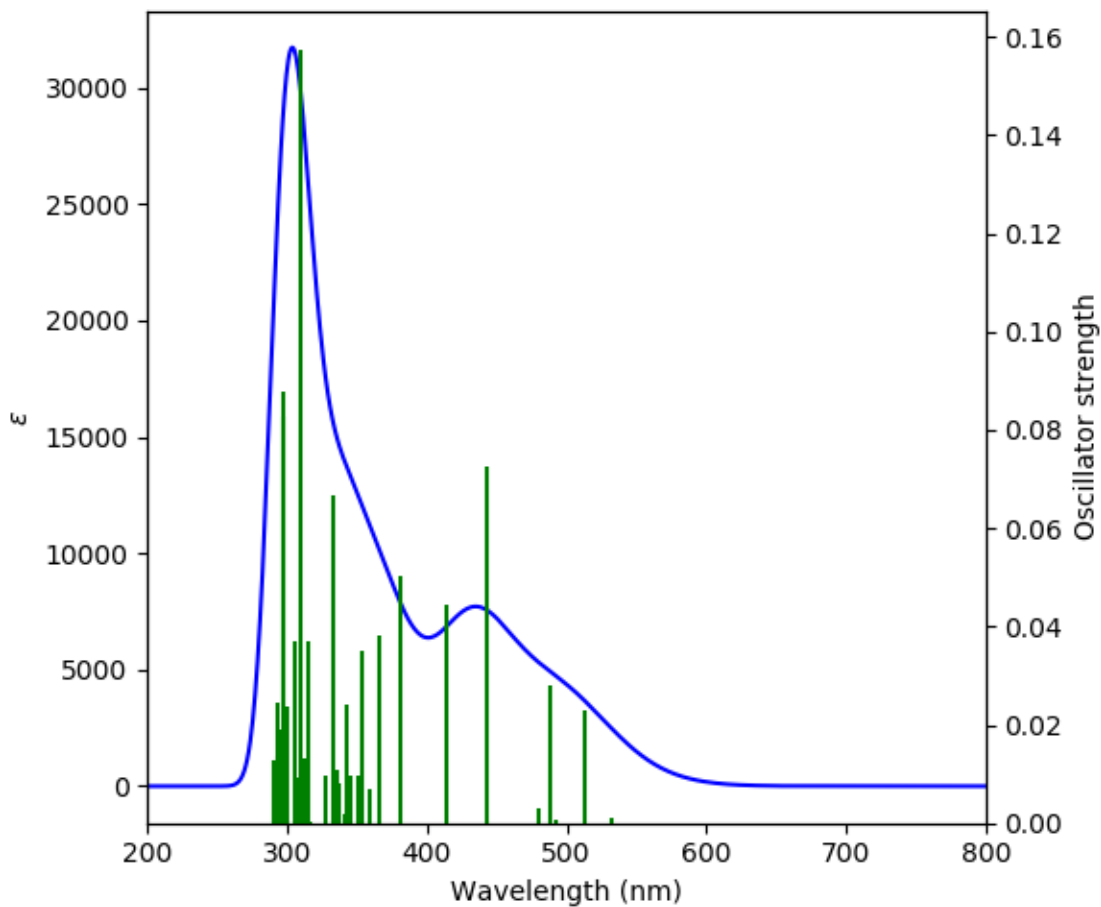

**Figure S99.** Calculated UV/vis spectrum for complex **3**.

**Table S30.** Calculated energy levels of the ten highest contributing singlet states and the first five triplet states for **3**.

| Spin State     | Transition configurations                   | Excitation energy<br>(eV, nm) | Oscillator strength |
|----------------|---------------------------------------------|-------------------------------|---------------------|
| S <sub>2</sub> | HOMO-1→LUMO (94.5%)<br>HOMO→LUMO (2.1%)     | 2.4194, 512.46                | 0.0230              |
| S <sub>4</sub> | HOMO-2→LUMO (93.3%)<br>HOMO-2→LUMO+1 (2.2%) | 2.5391, 488.30                | 0.0280              |

|                 |                                                                                                                    |                |        |
|-----------------|--------------------------------------------------------------------------------------------------------------------|----------------|--------|
| S <sub>6</sub>  | HOMO-2→LUMO+1 (97.1%)                                                                                              | 2.8022, 442.45 | 0.0727 |
| S <sub>7</sub>  | HOMO-3→LUMO (96.6%)                                                                                                | 2.9922, 414.36 | 0.0446 |
| S <sub>8</sub>  | HOMO-3→LUMO+1 (96.7%)                                                                                              | 3.2556, 380.83 | 0.0502 |
| S <sub>9</sub>  | HOMO-4→LUMO (94.8%)                                                                                                | 3.3909, 365.63 | 0.0382 |
| S <sub>14</sub> | HOMO-4→LUMO+1 (83.2%)<br>HOMO-2→LUMO+2 (3.4%)<br>HOMO-6→LUMO+1 (3.7%)<br>HOMO→LUMO+3 (5.3%)                        | 3.6200, 342.50 | 0.0240 |
| S <sub>19</sub> | HOMO-2→LUMO+2 (56.9%)<br>HOMO-7→LUMO (11.0%)<br>HOMO-5→LUMO (10.9%)<br>HOMO-6→LUMO (6.2%)<br>HOMO-1→LUMO+3 (4.0%)  | 3.7200, 333.29 | 0.0668 |
| S <sub>25</sub> | HOMO-8→LUMO (48.8%)<br>HOMO-3→LUMO+2 (29.7%)<br>HOMO-2→LUMO+2 (2.5%)<br>HOMO-2→LUMO+7 (2.9%)<br>HOMO-9→LUMO (4.6%) | 4.0141, 308.87 | 0.0027 |
| S <sub>32</sub> | HOMO-1→LUMO+5 (45.7%)<br>HOMO-2→LUMO+4 (10.7%)<br>HOMO-2→LUMO+7 (11.7%)<br>HOMO→LUMO+7 (15.8%)                     | 4.2029, 295.00 | 0.0189 |
| T <sub>1</sub>  | HOMO-2→LUMO (49.0%)<br>HOMO-3→LUMO (28.3%)<br>HOMO-1→LUMO (6.4%)                                                   | 2.1906, 565.99 | 0.0000 |

|                |                                                                                                                                                                |                |        |
|----------------|----------------------------------------------------------------------------------------------------------------------------------------------------------------|----------------|--------|
|                | HOMO-2→LUMO+1 (2.0%)<br>HOMO-3→LUMO+1 (2.01%)                                                                                                                  |                |        |
| T <sub>2</sub> | HOMO-2→LUMO+1 (47.8%)<br>HOMO-1→LUMO+1 (21.3%)<br>HOMO→LUMO (3.7%)<br>HOMO-1→LUMO (3.0%)<br>HOMO-7→LUMO+1 (2.3%)<br>HOMO-3→LUMO+1 (5.4%)<br>HOMO-3→LUMO (7.8%) | 2.2413, 553.18 | 0.0000 |
| T <sub>3</sub> | HOMO→LUMO (58.9%)<br>HOMO-1→LUMO (30.6%)<br>HOMO-1→LUMO+1 (2.3%)<br>HOMO-2→LUMO+1 (4.3%)                                                                       | 2.3041, 538.11 | 0.0000 |
| T <sub>4</sub> | HOMO-1→LUMO (53.6%)<br>HOMO-2→LUMO (2.0%)<br>HOMO-3→LUMO (2.9%)<br>HOMO→LUMO (35.0%)                                                                           | 2.3753, 521.97 | 0.0000 |
| T <sub>5</sub> | HOMO→LUMO+1 (89.8%)<br>HOMO-1→LUMO+1 (3.1%)<br>HOMO-2→LUMO+1 (5.1%)                                                                                            | 2.5098, 493.99 | 0.0000 |

**Table S31.** Calculated MO energies of orbitals involved in transitions for **3**.

| Orbital | Energy/<br>eV | Orbital | Energy/<br>eV |
|---------|---------------|---------|---------------|
|         |               |         |               |

|        |       |        |       |
|--------|-------|--------|-------|
| LUMO+7 | 0.16  | HOMO   | -4.66 |
| LUMO+6 | 0.14  | HOMO-1 | -4.78 |
| LUMO+5 | -0.04 | HOMO-2 | -4.94 |
| LUMO+4 | -0.27 | HOMO-3 | -5.35 |
| LUMO+3 | -0.49 | HOMO-4 | -5.75 |

|        |       |        |       |
|--------|-------|--------|-------|
| LUMO+2 | -0.70 | HOMO-5 | -6.01 |
| LUMO+1 | -1.59 | HOMO-6 | -6.04 |
| LUMO   | -1.83 | HOMO-7 | -6.09 |
|        |       | HOMO-8 | -6.48 |

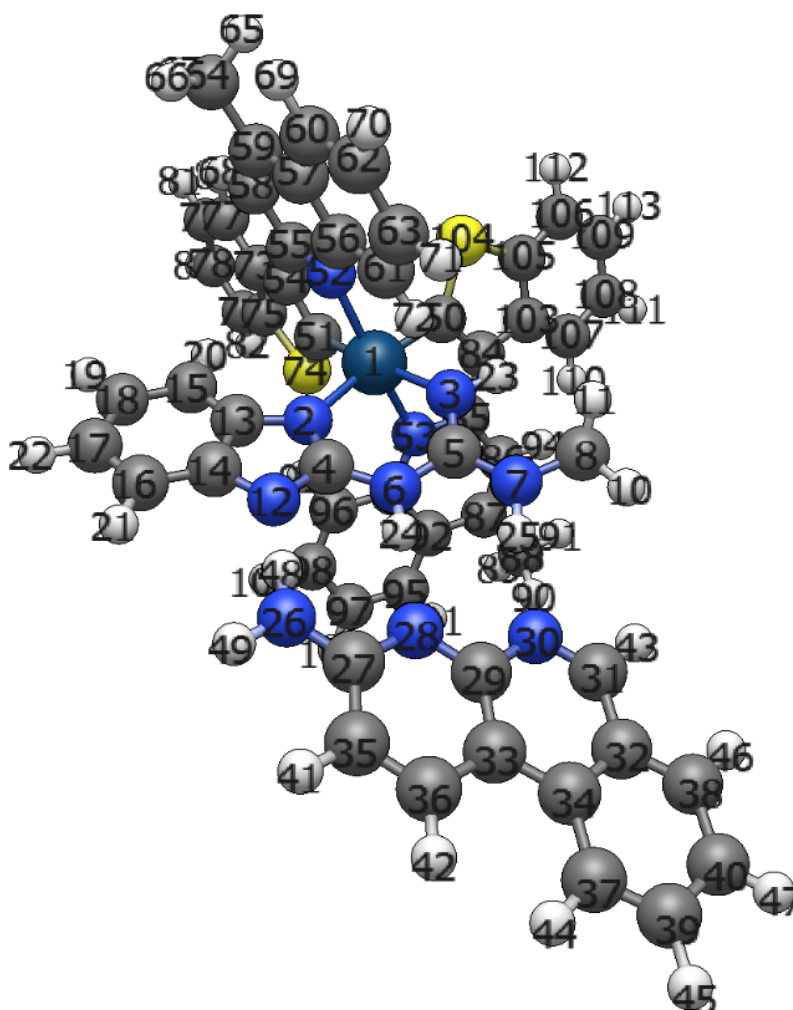

**Figure S100.** Optimised geometry model used for co-system **3•5**. TD-DFT inputs and energy calculations were based upon this optimised input model.

**Table S32.** Cartesian coordinates for optimised co-system **3•5**.

| Center Number | Atomic Number | Atomic Type | Coordinates (Angstroms) |           |           |
|---------------|---------------|-------------|-------------------------|-----------|-----------|
|               |               |             | X                       | Y         | Z         |
| 1             | 7             | 0           | 4.321331                | -3.877999 | 0.443801  |
| 2             | 6             | 0           | 5.320050                | -2.992009 | 0.258211  |
| 3             | 6             | 0           | 6.687140                | -3.399659 | 0.414671  |
| 4             | 7             | 0           | 5.002390                | -1.736199 | -0.095349 |
| 5             | 6             | 0           | 5.997000                | -0.845009 | -0.294999 |
| 6             | 7             | 0           | 5.575240                | 0.417971  | -0.667849 |

|    |    |   |           |           |           |
|----|----|---|-----------|-----------|-----------|
| 7  | 6  | 0 | 6.471360  | 1.349451  | -0.858119 |
| 8  | 6  | 0 | 7.377610  | -1.150799 | -0.142419 |
| 9  | 6  | 0 | 7.881700  | 1.174141  | -0.719889 |
| 10 | 6  | 0 | 8.357270  | -0.118049 | -0.357149 |
| 11 | 6  | 0 | 7.686560  | -2.488939 | 0.220661  |
| 12 | 6  | 0 | 8.786959  | 2.237702  | -0.942219 |
| 13 | 6  | 0 | 9.757650  | -0.295808 | -0.229469 |
| 14 | 6  | 0 | 10.625260 | 0.756642  | -0.450969 |
| 15 | 6  | 0 | 10.144889 | 2.035672  | -0.810019 |
| 16 | 1  | 0 | 6.910351  | -4.426079 | 0.691511  |
| 17 | 1  | 0 | 8.719870  | -2.796428 | 0.347871  |
| 18 | 1  | 0 | 6.098689  | 2.333811  | -1.147159 |
| 19 | 1  | 0 | 10.160700 | -1.264858 | 0.045941  |
| 20 | 1  | 0 | 11.695270 | 0.597592  | -0.346999 |
| 21 | 1  | 0 | 8.394679  | 3.213711  | -1.218639 |
| 22 | 1  | 0 | 10.843209 | 2.849742  | -0.979869 |
| 23 | 1  | 0 | 4.549611  | -4.784419 | 0.824241  |
| 24 | 1  | 0 | 3.333100  | -3.557270 | 0.528851  |
| 25 | 6  | 0 | -1.903929 | -4.458271 | 2.366781  |
| 26 | 6  | 0 | -0.769959 | -5.284880 | 2.471971  |
| 27 | 6  | 0 | -1.840920 | -3.207991 | 1.751341  |
| 28 | 6  | 0 | 0.462561  | -4.875740 | 1.968981  |
| 29 | 6  | 0 | -0.608680 | -2.793590 | 1.232301  |
| 30 | 6  | 0 | 0.540401  | -3.622100 | 1.350931  |
| 31 | 7  | 0 | 1.621320  | -2.974340 | 0.788921  |
| 32 | 7  | 0 | -0.210580 | -1.617490 | 0.594881  |
| 33 | 6  | 0 | 1.112460  | -1.814610 | 0.371971  |
| 34 | 7  | 0 | 1.987740  | -0.891460 | -0.205279 |
| 35 | 6  | 0 | 1.685330  | 0.156490  | -1.025789 |
| 36 | 7  | 0 | 0.443170  | 0.490110  | -1.291979 |
| 37 | 7  | 0 | 2.762070  | 0.787860  | -1.568329 |
| 38 | 6  | 0 | 2.633519  | 1.988360  | -2.366689 |
| 39 | 1  | 0 | 2.061769  | 1.804320  | -3.285859 |
| 40 | 1  | 0 | 3.636229  | 2.306581  | -2.660949 |
| 41 | 1  | 0 | 2.154309  | 2.814950  | -1.820819 |
| 42 | 1  | 0 | -2.851709 | -4.797811 | 2.776951  |
| 43 | 1  | 0 | -2.719200 | -2.578581 | 1.685521  |
| 44 | 1  | 0 | -0.857669 | -6.253740 | 2.957631  |
| 45 | 1  | 0 | 1.344461  | -5.505900 | 2.054621  |
| 46 | 1  | 0 | 2.973410  | -1.174440 | -0.157829 |
| 47 | 1  | 0 | 3.695070  | 0.575001  | -1.197279 |
| 48 | 77 | 0 | -1.353690 | 0.127300  | -0.090969 |
| 49 | 6  | 0 | -3.005000 | -0.034101 | 0.994031  |
| 50 | 6  | 0 | -2.093391 | 1.768109  | -0.928219 |
| 51 | 7  | 0 | -0.492431 | 1.669370  | 1.121511  |
| 52 | 7  | 0 | -2.545880 | -1.235211 | -1.268059 |

|    |    |   |           |           |           |
|----|----|---|-----------|-----------|-----------|
| 53 | 6  | 0 | -0.665171 | 2.909730  | 0.592761  |
| 54 | 6  | 0 | -1.592281 | 2.997810  | -0.517819 |
| 55 | 16 | 0 | -3.225911 | 1.936939  | -2.236569 |
| 56 | 6  | 0 | -2.141751 | 4.135339  | -1.248909 |
| 57 | 6  | 0 | -3.056121 | 3.692659  | -2.244089 |
| 58 | 6  | 0 | 0.051019  | 4.017990  | 1.120401  |
| 59 | 6  | 0 | 0.873109  | 3.902730  | 2.211821  |
| 60 | 6  | 0 | 0.243199  | 1.524740  | 2.282621  |
| 61 | 6  | 0 | 0.956839  | 2.628310  | 2.855181  |
| 62 | 6  | 0 | 1.706329  | 2.426160  | 4.041071  |
| 63 | 6  | 0 | 0.271390  | 0.281660  | 2.961721  |
| 64 | 6  | 0 | 1.734350  | 1.198430  | 4.667111  |
| 65 | 6  | 0 | 0.997080  | 0.126350  | 4.124801  |
| 66 | 6  | 0 | 1.639419  | 5.094880  | 2.724791  |
| 67 | 1  | 0 | 1.466379  | 5.971330  | 2.093961  |
| 68 | 1  | 0 | 2.718209  | 4.898280  | 2.746291  |
| 69 | 1  | 0 | 1.339329  | 5.352080  | 3.748111  |
| 70 | 1  | 0 | -0.037241 | 4.972990  | 0.622301  |
| 71 | 1  | 0 | 2.253909  | 3.261190  | 4.465961  |
| 72 | 1  | 0 | 2.308730  | 1.061450  | 5.578851  |
| 73 | 1  | 0 | -0.295290 | -0.543580 | 2.559731  |
| 74 | 1  | 0 | 0.991670  | -0.837590 | 4.625381  |
| 75 | 6  | 0 | -1.955721 | 5.527249  | -1.127029 |
| 76 | 6  | 0 | -3.728651 | 4.572599  | -3.092739 |
| 77 | 6  | 0 | -2.625101 | 6.408189  | -1.971689 |
| 78 | 6  | 0 | -3.504521 | 5.939929  | -2.957459 |
| 79 | 1  | 0 | -1.310921 | 5.940640  | -0.360959 |
| 80 | 1  | 0 | -4.419831 | 4.194359  | -3.840989 |
| 81 | 1  | 0 | -2.465612 | 7.477059  | -1.856359 |
| 82 | 1  | 0 | -4.018962 | 6.641269  | -3.608369 |
| 83 | 6  | 0 | -3.781850 | -1.450251 | -0.738689 |
| 84 | 6  | 0 | -4.085990 | -0.739291 | 0.480841  |
| 85 | 16 | 0 | -3.394250 | 0.717749  | 2.515001  |
| 86 | 6  | 0 | -5.291260 | -0.661501 | 1.300231  |
| 87 | 6  | 0 | -5.045440 | 0.098939  | 2.475811  |
| 88 | 6  | 0 | -6.600360 | -1.152181 | 1.121251  |
| 89 | 6  | 0 | -6.023530 | 0.327879  | 3.443411  |
| 90 | 6  | 0 | -7.581110 | -0.922462 | 2.082361  |
| 91 | 6  | 0 | -7.299080 | -0.194752 | 3.246021  |
| 92 | 1  | 0 | -8.075180 | -0.027042 | 3.987531  |
| 93 | 1  | 0 | -5.793180 | 0.910819  | 4.331021  |
| 94 | 1  | 0 | -6.878310 | -1.689382 | 0.222531  |
| 95 | 1  | 0 | -8.582980 | -1.311152 | 1.919771  |
| 96 | 6  | 0 | -2.186100 | -1.912291 | -2.421139 |
| 97 | 6  | 0 | -0.913510 | -1.705320 | -3.003999 |
| 98 | 6  | 0 | -0.539730 | -2.365080 | -4.157139 |



|     |   |   |           |           |           |
|-----|---|---|-----------|-----------|-----------|
| 99  | 6 | 0 | -1.414880 | -3.268080 | -4.791589 |
| 100 | 6 | 0 | -3.077510 | -2.833051 | -3.063529 |
| 101 | 6 | 0 | -4.676470 | -2.376981 | -1.339679 |
| 102 | 6 | 0 | -4.360350 | -3.068641 | -2.477309 |
| 103 | 6 | 0 | -2.660940 | -3.492061 | -4.246529 |
| 104 | 6 | 0 | -5.333069 | -4.052411 | -3.074529 |
| 105 | 1 | 0 | -4.903099 | -5.060241 | -3.121949 |
| 106 | 1 | 0 | -5.609739 | -3.770741 | -4.098049 |
| 107 | 1 | 0 | -6.249359 | -4.103651 | -2.479889 |
| 108 | 1 | 0 | -5.622620 | -2.562891 | -0.853069 |
| 109 | 1 | 0 | -0.240720 | -1.010640 | -2.523269 |
| 110 | 1 | 0 | 0.446550  | -2.183210 | -4.576199 |
| 111 | 1 | 0 | -1.111169 | -3.783240 | -5.698469 |
| 112 | 1 | 0 | -3.341819 | -4.187471 | -4.726399 |
| 113 | 1 | 0 | 0.366780  | 1.314430  | -1.876689 |

---

**Energy**

E(RB3LYP) = -3646.75691618 Hartree

Zero point corrected free energy = -3645.874067 Hartree

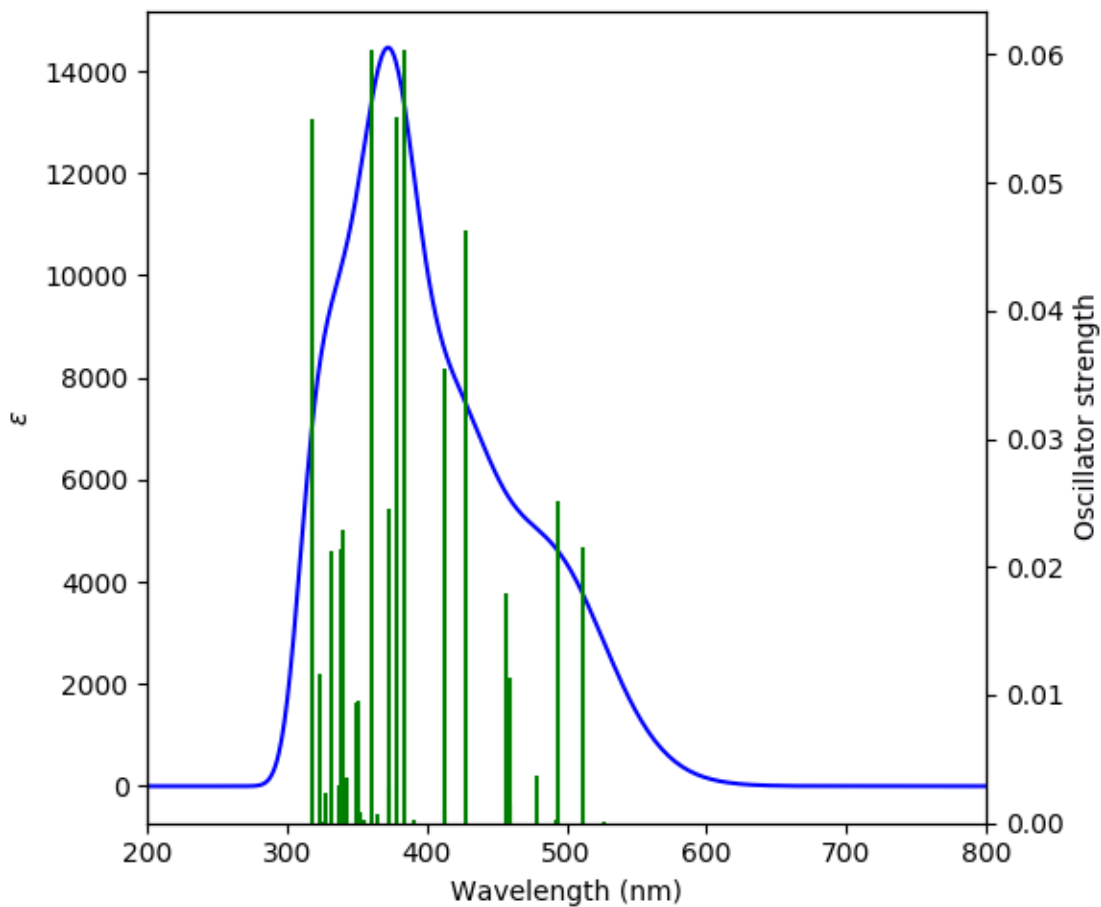

**Figure S101.** Calculated UV/vis spectrum for co-system **3•5**.

**Table S33.** Calculated energy levels of the ten highest contributing singlet states and the first five triplet states for **3•5**.

| Spin State     | Transition configurations | Excitation energy<br>(eV, nm) | Oscillator strength |
|----------------|---------------------------|-------------------------------|---------------------|
| S <sub>2</sub> | HOMO→LUMO+1 (93.4%)       | 2.4212, 512.07                | 0.0216              |
|                | HOMO-1→LUMO+1 (4.8%)      |                               |                     |
| S <sub>3</sub> | HOMO-1→LUMO+1 (87.0%)     | 2.5312, 493.32                | 0.0251              |
|                | HOMO-2→LUMO+1 (4.0%)      |                               |                     |

|                 |                                                                                                                                                                       |                |        |
|-----------------|-----------------------------------------------------------------------------------------------------------------------------------------------------------------------|----------------|--------|
|                 | HOMO→LUMO+1 (4.6%)                                                                                                                                                    |                |        |
| S <sub>5</sub>  | HOMO→LUMO+2 (90.6%)<br>HOMO-1→LUMO+2 (5.4%)                                                                                                                           | 2.5875, 479.17 | 0.0037 |
| S <sub>9</sub>  | HOMO-2→LUMO+2 (95.5%)                                                                                                                                                 | 2.9009, 427.39 | 0.0463 |
| S <sub>10</sub> | HOMO-3→LUMO+1 (93.2%)<br>HOMO-3→LUMO (3.2%)                                                                                                                           | 2.9998, 413.31 | 0.0355 |
| S <sub>13</sub> | HOMO-3→LUMO+2 (95.0%)                                                                                                                                                 | 3.2333, 383.46 | 0.0604 |
| S <sub>14</sub> | HOMO-5→LUMO (96.3%)                                                                                                                                                   | 3.2789, 378.13 | 0.0551 |
| S <sub>18</sub> | HOMO-4→LUMO+1 (49.9%)<br>HOMO-6→LUMO+1 (41.6%)                                                                                                                        | 3.4396, 360.46 | 0.0603 |
| S <sub>29</sub> | HOMO-8→LUMO+1 (67.3%)<br>HOMO-7→LUMO+1 (22.2%)<br>HOMO-10→LUMO+1 (2.7%)<br>HOMO-1→LUMO+4 (3.8%)                                                                       | 3.7361, 331.85 | 0.0212 |
| S <sub>35</sub> | HOMO-7→LUMO+2 (60.7%)<br>HOMO-5→LUMO+2 (6.2%)<br>HOMO-2→LUMO+6 (2.7%)<br>HOMO-1→LUMO+6 (23.7%)                                                                        | 3.9040, 317.59 | 0.0549 |
| T <sub>1</sub>  | HOMO-9→LUMO+1 (2.3%)<br>HOMO-3→LUMO+1 (21.1%)<br>HOMO-3→LUMO+2 (3.6%)<br>HOMO-2→LUMO+1 (15.8%)<br>HOMO-1→LUMO+1 (37.3%)<br>HOMO-1→LUMO+2 (4.2%)<br>HOMO→LUMO+1 (6.7%) | 2.1886, 565.49 | 0.0000 |

|                |                                                                                                                                                                                       |                |        |
|----------------|---------------------------------------------------------------------------------------------------------------------------------------------------------------------------------------|----------------|--------|
|                | HOMO→LUMO+2 (2.5%)                                                                                                                                                                    |                |        |
| T <sub>2</sub> | HOMO-8→LUMO+2 (2.2%)<br>HOMO-3→LUMO+1 (13.1%)<br>HOMO-3→LUMO+2 (4.9%)<br>HOMO-2→LUMO+1 (2.4%)<br>HOMO-2→LUMO+2 (7.6%)<br>HOMO-1→LUMO+2 (41.2%)<br>HOMO→LUMO+2 (18.9%)                 | 2.2312, 555.67 | 0.0000 |
| T <sub>3</sub> | HOMO→LUMO (91.1%)<br>HOMO→LUMO+1 (3.0%)<br>HOMO-1→LUMO (3.7%)                                                                                                                         | 2.3495, 527.72 | 0.0000 |
| T <sub>4</sub> | HOMO-9→LUMO+1 (3.0%)<br>HOMO-6→LUMO+1 (2.2%)<br>HOMO-3→LUMO+1 (2.5%)<br>HOMO-2→LUMO+1 (6.7%)<br>HOMO-1→LUMO+2 (2.7%)<br>HOMO→LUMO (3.9%)<br>HOMO→LUMO+1 (70.5%)<br>HOMO→LUMO+2 (2.2%) | 2.3536, 526.78 | 0.0000 |
| T <sub>5</sub> | HOMO-15→LUMO (2.1%)<br>HOMO-5→LUMO (44.0%)<br>HOMO-2→LUMO (3.6%)<br>HOMO-1→LUMO (43.1%)<br>HOMO→LUMO (3.9%)                                                                           | 2.4916, 497.61 | 0.0000 |

**Table S34.** Calculated MO energies of orbitals involved in transitions for co-system **3•5**.

| Orbital                                                                                       | Energy/<br>eV | Orbital                                                                                         | Energy/<br>eV |
|-----------------------------------------------------------------------------------------------|---------------|-------------------------------------------------------------------------------------------------|---------------|
| LUMO+7<br>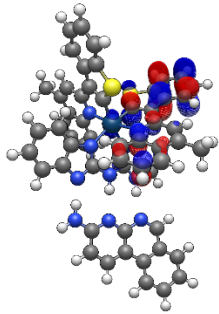   | -0.11         | HOMO<br>     | -4.60         |
| LUMO+6<br>   | -0.33         | HOMO-1<br>   | -4.71         |
| LUMO+5<br> | -0.42         | HOMO-2<br> | -4.89         |
| LUMO+4<br> | -0.52         | HOMO-3<br> | -5.17         |

|                                                                                                  |       |                                                                                                    |       |
|--------------------------------------------------------------------------------------------------|-------|----------------------------------------------------------------------------------------------------|-------|
| 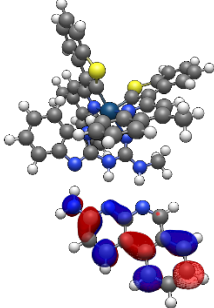 <p>LUMO+3</p>  | -1.07 |  <p>HOMO-4</p>  | -5.59 |
|  <p>LUMO+2</p>  | -1.43 |  <p>HOMO-5</p>  | -5.64 |
|  <p>LUMO+1</p> | -1.64 |  <p>HOMO-6</p> | -5.70 |
|  <p>LUMO</p>  | -1.88 |  <p>HOMO-7</p> | -5.86 |

|  |  |                                                                                                |       |
|--|--|------------------------------------------------------------------------------------------------|-------|
|  |  | HOMO-8<br>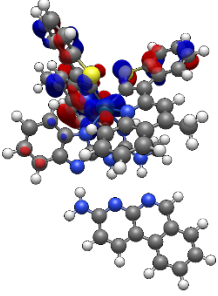   | -5.93 |
|  |  | HOMO-9<br>  | -6.21 |
|  |  | HOMO-15<br> | -6.82 |

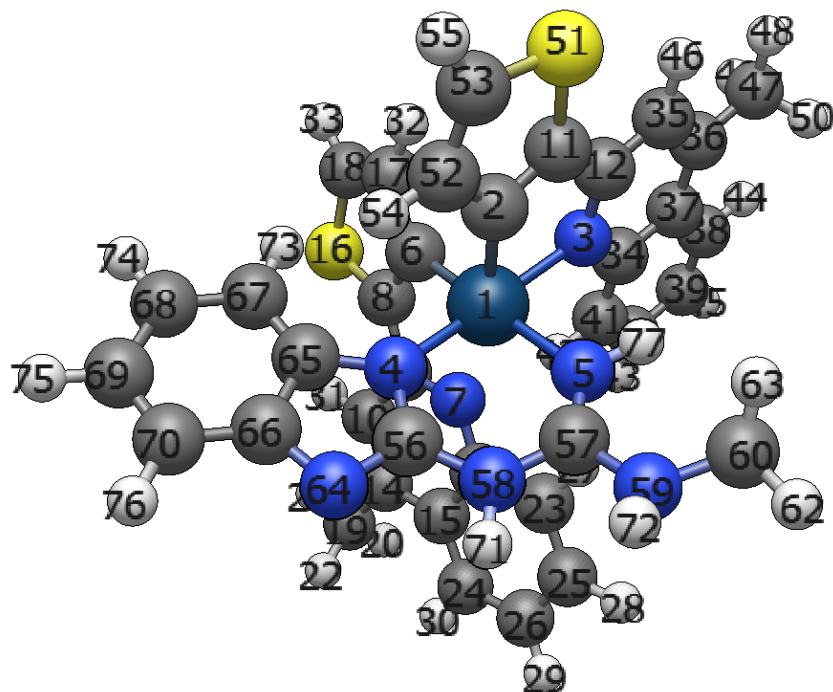

**Figure S102.** Optimised geometry model used for complex **4**. TD-DFT inputs and energy calculations were based upon this optimised input model.

**Table S35.** Cartesian coordinates for optimised compound **4**.

| Center Number | Atomic Number | Atomic Type | Coordinates (Angstroms) |           |           |
|---------------|---------------|-------------|-------------------------|-----------|-----------|
|               |               |             | X                       | Y         | Z         |
| 1             | 77            | 0           | -0.245501               | -0.439741 | 0.125478  |
| 2             | 6             | 0           | -1.284637               | -2.126215 | 0.200460  |
| 3             | 7             | 0           | -2.269839               | 0.313091  | -0.178417 |
| 4             | 7             | 0           | 1.534971                | -1.400319 | 0.609845  |
| 5             | 7             | 0           | -0.576792               | -0.235191 | 2.269435  |
| 6             | 6             | 0           | 0.009893                | -0.487851 | -1.871326 |
| 7             | 7             | 0           | 1.225948                | 1.393434  | -0.287182 |
| 8             | 6             | 0           | 0.934125                | 0.402396  | -2.400810 |
| 9             | 6             | 0           | 1.652665                | 1.321550  | -1.563646 |
| 10            | 6             | 0           | 2.745083                | 2.106098  | -2.034291 |
| 11            | 6             | 0           | -2.658114               | -1.984830 | 0.058192  |
| 12            | 6             | 0           | -3.196321               | -0.676863 | -0.149507 |
| 13            | 6             | 0           | 1.839752                | 2.287273  | 0.557990  |
| 14            | 6             | 0           | 3.415353                | 2.967479  | -1.206664 |



|    |    |   |           |           |           |
|----|----|---|-----------|-----------|-----------|
| 15 | 6  | 0 | 2.952311  | 3.090456  | 0.145914  |
| 16 | 16 | 0 | 1.078155  | 0.282496  | -4.149738 |
| 17 | 6  | 0 | -0.602859 | -1.255282 | -2.915945 |
| 18 | 6  | 0 | -0.134848 | -0.956640 | -4.169258 |
| 19 | 6  | 0 | 4.593042  | 3.763101  | -1.707616 |
| 20 | 1  | 0 | 4.415711  | 4.842164  | -1.619438 |
| 21 | 1  | 0 | 4.795965  | 3.538663  | -2.758343 |
| 22 | 1  | 0 | 5.499216  | 3.536697  | -1.132548 |
| 23 | 6  | 0 | 1.328578  | 2.460308  | 1.868410  |
| 24 | 6  | 0 | 3.534435  | 3.985465  | 1.076667  |
| 25 | 6  | 0 | 1.910424  | 3.353272  | 2.744810  |
| 26 | 6  | 0 | 3.030857  | 4.116075  | 2.355163  |
| 27 | 1  | 0 | 0.460644  | 1.879317  | 2.151282  |
| 28 | 1  | 0 | 1.499145  | 3.470587  | 3.744199  |
| 29 | 1  | 0 | 3.488478  | 4.810351  | 3.054219  |
| 30 | 1  | 0 | 4.387212  | 4.583625  | 0.771519  |
| 31 | 1  | 0 | 3.060050  | 1.986595  | -3.066571 |
| 32 | 1  | 0 | -1.354235 | -2.017270 | -2.739812 |
| 33 | 1  | 0 | -0.429911 | -1.396635 | -5.113738 |
| 34 | 6  | 0 | -2.699661 | 1.609816  | -0.373002 |
| 35 | 6  | 0 | -4.583240 | -0.410004 | -0.312960 |
| 36 | 6  | 0 | -5.049710 | 0.863300  | -0.503831 |
| 37 | 6  | 0 | -4.088918 | 1.927936  | -0.534642 |
| 38 | 6  | 0 | -4.465352 | 3.280813  | -0.720424 |
| 39 | 6  | 0 | -3.524362 | 4.289519  | -0.749625 |
| 40 | 6  | 0 | -2.160063 | 3.970930  | -0.596547 |
| 41 | 6  | 0 | -1.756741 | 2.663662  | -0.414029 |
| 42 | 1  | 0 | -0.711484 | 2.411993  | -0.309612 |
| 43 | 1  | 0 | -1.413111 | 4.759547  | -0.625407 |
| 44 | 1  | 0 | -5.516231 | 3.522462  | -0.842801 |
| 45 | 1  | 0 | -3.832564 | 5.321065  | -0.893915 |
| 46 | 1  | 0 | -5.272860 | -1.248412 | -0.283978 |
| 47 | 6  | 0 | -6.523034 | 1.128146  | -0.677183 |
| 48 | 1  | 0 | -7.094851 | 0.197554  | -0.624927 |
| 49 | 1  | 0 | -6.732186 | 1.599958  | -1.644987 |
| 50 | 1  | 0 | -6.903292 | 1.803655  | 0.098970  |
| 51 | 16 | 0 | -3.517602 | -3.516003 | 0.137230  |
| 52 | 6  | 0 | -0.924974 | -3.501327 | 0.377975  |
| 53 | 6  | 0 | -2.004744 | -4.345056 | 0.366894  |
| 54 | 1  | 0 | 0.095130  | -3.848062 | 0.494404  |
| 55 | 1  | 0 | -2.006735 | -5.422666 | 0.474211  |
| 56 | 6  | 0 | 2.113355  | -1.374956 | 1.842101  |
| 57 | 6  | 0 | 0.261358  | -0.458442 | 3.239980  |
| 58 | 7  | 0 | 1.557235  | -0.779368 | 2.987126  |
| 59 | 7  | 0 | -0.040533 | -0.299422 | 4.581710  |
| 60 | 6  | 0 | -1.384411 | 0.054155  | 5.010733  |

|    |   |   |           |           |           |
|----|---|---|-----------|-----------|-----------|
| 61 | 1 | 0 | -1.683771 | 1.000857  | 4.550020  |
| 62 | 1 | 0 | -1.374238 | 0.197242  | 6.093687  |
| 63 | 1 | 0 | -2.137653 | -0.710828 | 4.767910  |
| 64 | 7 | 0 | 3.284166  | -1.970229 | 1.986513  |
| 65 | 6 | 0 | 2.445633  | -2.151026 | -0.143746 |
| 66 | 6 | 0 | 3.526281  | -2.475507 | 0.725133  |
| 67 | 6 | 0 | 2.435025  | -2.612032 | -1.466472 |
| 68 | 6 | 0 | 3.522902  | -3.366876 | -1.902400 |
| 69 | 6 | 0 | 4.603550  | -3.669263 | -1.051258 |
| 70 | 6 | 0 | 4.614345  | -3.230933 | 0.268541  |
| 71 | 1 | 0 | 2.211163  | -0.782116 | 3.758542  |
| 72 | 1 | 0 | 0.450326  | -0.935528 | 5.197458  |
| 73 | 1 | 0 | 1.611345  | -2.399451 | -2.134720 |
| 74 | 1 | 0 | 3.532852  | -3.730920 | -2.926827 |
| 75 | 1 | 0 | 5.434091  | -4.259604 | -1.430786 |
| 76 | 1 | 0 | 5.432643  | -3.467572 | 0.943136  |
| 77 | 1 | 0 | -1.544055 | -0.152996 | 2.561241  |

---

**Energy**

E(RB3LYP) = -2712.37592708 Hartree

Zero point corrected free energy = -2711.849522 Hartree

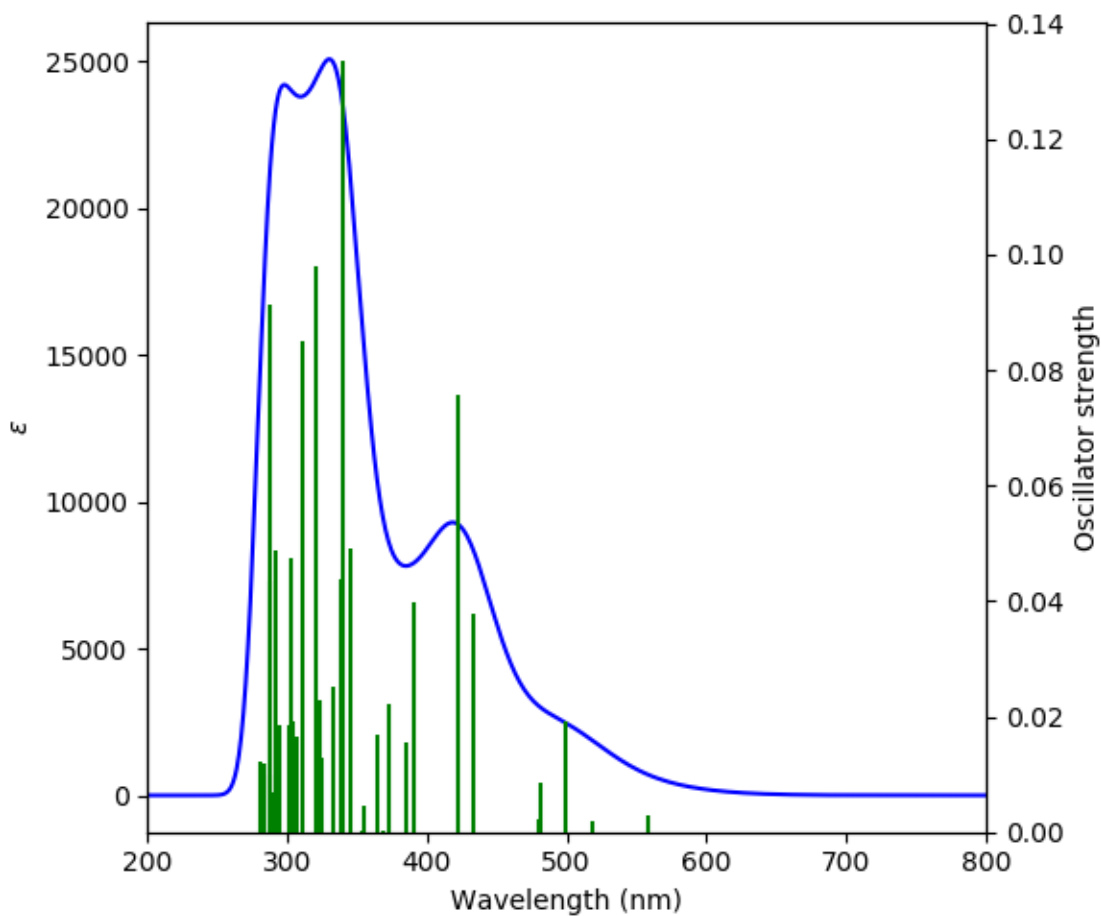

**Figure S103.** Calculated UV/vis spectrum for complex **4**.

**Table S36.** Calculated energy levels of the ten highest contributing singlet states and the first five triplet states for **4**.

| Spin State     | Transition configurations                   | Excitation energy<br>(eV, nm) | Oscillator strength |
|----------------|---------------------------------------------|-------------------------------|---------------------|
| S <sub>3</sub> | HOMO→LUMO+1 (96.1%)                         | 2.4846, 499.02                | 0.0193              |
| S <sub>6</sub> | HOMO-2→LUMO+1 (89.2%)<br>HOMO-3→LUMO (6.5%) | 2.8577, 433.86                | 0.0379              |
| S <sub>7</sub> | HOMO-3→LUMO (87.5%)                         | 2.9402, 421.69                | 0.0757              |

|                 |                                                                                                                     |                |        |
|-----------------|---------------------------------------------------------------------------------------------------------------------|----------------|--------|
|                 | HOMO-2→LUMO+1 (5.9%)                                                                                                |                |        |
| S <sub>8</sub>  | HOMO-3→LUMO+1 (85.8%)<br>HOMO→LUMO+2 (5.1%)<br>HOMO-4→LUMO+1 (2.4%)                                                 | 3.2213, 384.89 | 0.0397 |
| S <sub>10</sub> | HOMO-4→LUMO (81.2%)<br>HOMO→LUMO+2 (7.7%)<br>HOMO-6→LUMO (6.4%)                                                     | 3.3290, 372.43 | 0.0221 |
| S <sub>15</sub> | HOMO-2→LUMO+2 (61.2%)<br>HOMO-6→LUMO (12.8%)<br>HOMO-5→LUMO (11.4%)<br>HOMO-4→LUMO (4.2%)<br>HOMO-2→LUMO+2 (3.6%)   | 3.5856, 345.78 | 0.0491 |
| S <sub>16</sub> | HOMO-5→LUMO (60.8%)<br>HOMO-4→LUMO+1 (17.0%)<br>HOMO-2→LUMO+2 (14.9%)                                               | 3.6430, 340.33 | 0.1335 |
| S <sub>21</sub> | HOMO-6→LUMO+1 (34.5%)<br>HOMO-5→LUMO+1 (32.2%)<br>HOMO-3→LUMO+3 (3.0%)<br>HOMO-2→LUMO+3 (2.7%)                      | 3.8616, 321.07 | 0.0979 |
| S <sub>25</sub> | HOMO-3→LUMO+3 (39.0%)<br>HOMO→LUMO+4 (25.9%)<br>HOMO-7→LUMO+1 (2.6%)<br>HOMO-1→LUMO+4 (2.1%)<br>HOMO→LUMO+5 (16.4%) | 4.0978, 302.56 | 0.0474 |
| S <sub>33</sub> | HOMO-9→LUMO (3.1%)                                                                                                  | 4.3183, 287.11 | 0.0913 |

|                |                                                                                                                                              |                |        |
|----------------|----------------------------------------------------------------------------------------------------------------------------------------------|----------------|--------|
|                | HOMO-7→LUMO+1 (2.9%)<br>HOMO-2→LUMO+5 (2.2%)<br>HOMO-2→LUMO+7 (2.3%)<br>HOMO-1→LUMO+4 (44.2%)<br>HOMO-1→LUMO+5 (22.5%)<br>HOMO→LUMO+4 (4.2%) |                |        |
| T <sub>1</sub> | HOMO-5→LUMO (3.6%)<br>HOMO-3→LUMO (17.6%)<br>HOMO-2→LUMO (26.5%)<br>HOMO-1→LUMO (3.8%)<br>HOMO→LUMO (42.2%)                                  | 1.9932, 622.03 | 0.0000 |
| T <sub>2</sub> | HOMO-3→LUMO+1 (11.4%)<br>HOMO-2→LUMO+1 (26.0%)<br>HOMO-1→LUMO+1 (8.1%)<br>HOMO→LUMO+1 (43.4%)                                                | 2.1195, 584.96 | 0.0000 |
| T <sub>3</sub> | HOMO-3→LUMO (10.4%)<br>HOMO-2→LUMO (16.0%)<br>HOMO-1→LUMO (53.8%)<br>HOMO→LUMO (13.6%)                                                       | 2.3411, 529.59 | 0.0000 |
| T <sub>4</sub> | HOMO-5→LUMO (3.4%)<br>HOMO-3→LUMO (6.1%)<br>HOMO-2→LUMO (6.4%)<br>HOMO-1→LUMO (38.5%)<br>HOMO→LUMO (42.7%)                                   | 2.4081, 529.86 | 0.0000 |
| T <sub>5</sub> | HOMO-4→LUMO+1 (4.1%)<br>HOMO-3→LUMO+1 (4.1%)                                                                                                 | 2.5521, 485.82 | 0.0000 |

|  |                                                                      |  |  |
|--|----------------------------------------------------------------------|--|--|
|  | HOMO-2→LUMO+1 (13.9%)<br>HOMO-1→LUMO+1 (69.0%)<br>HOMO→LUMO+1 (2.2%) |  |  |
|--|----------------------------------------------------------------------|--|--|

**Table S37.** Calculated MO energies of orbitals involved in transitions for **4**.

| Orbital                                                                                       | Energy/<br>eV | Orbital                                                                                        | Energy/<br>eV |
|-----------------------------------------------------------------------------------------------|---------------|------------------------------------------------------------------------------------------------|---------------|
| LUMO+7<br>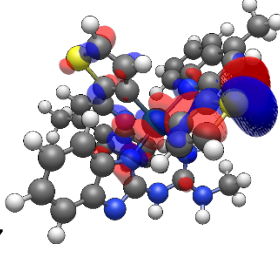   | 0.63          | HOMO<br>     | -4.58         |
| LUMO+6<br> | 0.41          | HOMO-1<br> | -4.65         |
| LUMO+5<br> | 0.23          | HOMO-2<br> | -4.97         |

|        |       |        |       |
|--------|-------|--------|-------|
| LUMO+4 | 0.19  | HOMO-3 | -5.27 |
| LUMO+3 | -0.61 | HOMO-4 | -5.71 |
| LUMO+2 | -0.85 | HOMO-5 | -5.89 |
| LUMO+1 | -1.51 | HOMO-6 | -5.95 |
| LUMO   | -1.79 | HOMO-7 | -6.27 |

|  |  |                                                                                    |       |
|--|--|------------------------------------------------------------------------------------|-------|
|  |  | HOMO-8                                                                             | -6.42 |
|  |  | 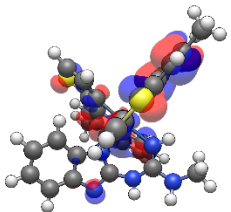 |       |
|  |  | HOMO-9                                                                             | -6.54 |
|  |  |  |       |

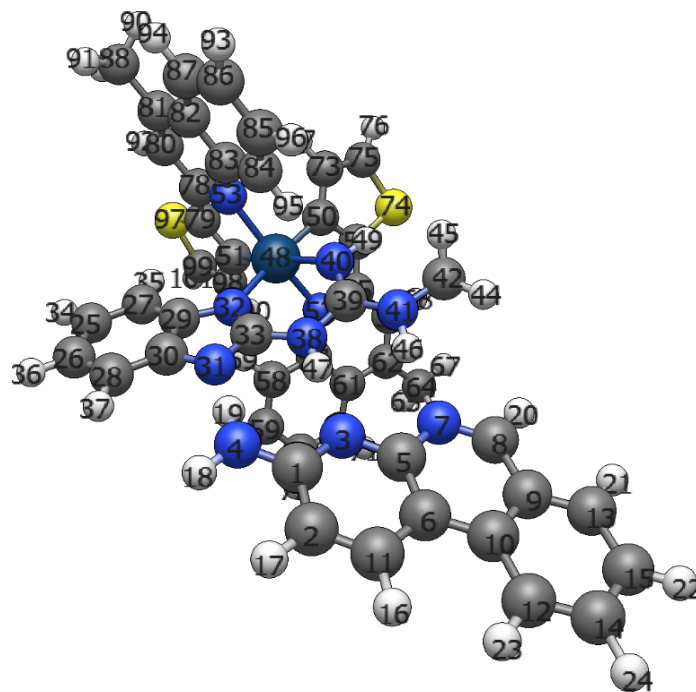

**Figure S104.** Optimised geometry model used for co-system **4•5**. TD-DFT inputs and energy calculations were based upon this optimised input model.



**Table S38.** Cartesian coordinates for optimised co-system 4•5.

| Center<br>Number | Atomic<br>Number | Atomic<br>Type | Coordinates (Angstroms) |           |           |
|------------------|------------------|----------------|-------------------------|-----------|-----------|
|                  |                  |                | X                       | Y         | Z         |
| 1                | 6                | 0              | -4.616579               | -3.016001 | 0.903179  |
| 2                | 6                | 0              | -5.954089               | -3.474611 | 1.149559  |
| 3                | 7                | 0              | -4.382099               | -1.885861 | 0.217139  |
| 4                | 7                | 0              | -3.561109               | -3.730751 | 1.341159  |
| 5                | 6                | 0              | -5.432679               | -1.169651 | -0.236661 |
| 6                | 6                | 0              | -6.791169               | -1.532811 | -0.022561 |
| 7                | 7                | 0              | -5.093429               | -0.029851 | -0.942411 |
| 8                | 6                | 0              | -6.049330               | 0.735499  | -1.397291 |
| 9                | 6                | 0              | -7.446810               | 0.491049  | -1.233721 |
| 10               | 6                | 0              | -7.837039               | -0.683711 | -0.530021 |
| 11               | 6                | 0              | -7.011499               | -2.738241 | 0.696019  |
| 12               | 6                | 0              | -9.223929               | -0.932222 | -0.375431 |
| 13               | 6                | 0              | -8.420590               | 1.373469  | -1.756201 |
| 14               | 6                | 0              | -10.159409              | -0.057012 | -0.893471 |
| 15               | 6                | 0              | -9.763530               | 1.106448  | -1.590001 |
| 16               | 1                | 0              | -8.022739               | -3.081791 | 0.890709  |
| 17               | 1                | 0              | -6.109519               | -4.398681 | 1.699099  |
| 18               | 1                | 0              | -3.734189               | -4.510821 | 1.957639  |
| 19               | 1                | 0              | -2.602759               | -3.318641 | 1.347129  |
| 20               | 1                | 0              | -5.741390               | 1.627779  | -1.945421 |
| 21               | 1                | 0              | -8.092730               | 2.262809  | -2.289601 |
| 22               | 1                | 0              | -10.514230              | 1.781708  | -1.989671 |
| 23               | 1                | 0              | -9.562869               | -1.815982 | 0.155129  |
| 24               | 1                | 0              | -11.217559              | -0.267382 | -0.762581 |
| 25               | 6                | 0              | 2.598381                | -3.217810 | 3.480589  |
| 26               | 6                | 0              | 1.536151                | -4.094910 | 3.768979  |
| 27               | 6                | 0              | 2.459411                | -2.182970 | 2.555519  |
| 28               | 6                | 0              | 0.300521                | -3.952911 | 3.142059  |
| 29               | 6                | 0              | 1.224471                | -2.039860 | 1.911919  |
| 30               | 6                | 0              | 0.146481                | -2.917371 | 2.212579  |
| 31               | 7                | 0              | -0.954249               | -2.547341 | 1.467359  |
| 32               | 7                | 0              | 0.762251                | -1.114921 | 0.975909  |
| 33               | 6                | 0              | -0.523639               | -1.492471 | 0.772679  |
| 34               | 1                | 0              | 3.549651                | -3.345980 | 3.991189  |
| 35               | 1                | 0              | 3.280451                | -1.507640 | 2.350029  |
| 36               | 1                | 0              | 1.682161                | -4.891000 | 4.495169  |
| 37               | 1                | 0              | -0.526169               | -4.622681 | 3.366499  |
| 38               | 7                | 0              | -1.440649               | -0.839051 | -0.055111 |
| 39               | 6                | 0              | -1.178289               | -0.049021 | -1.138811 |
| 40               | 7                | 0              | 0.045110                | 0.303129  | -1.456291 |

|    |    |   |           |           |           |
|----|----|---|-----------|-----------|-----------|
| 41 | 7  | 0 | -2.274920 | 0.299449  | -1.868711 |
| 42 | 6  | 0 | -2.201640 | 1.237649  | -2.968181 |
| 43 | 1  | 0 | -1.807850 | 2.220049  | -2.666631 |
| 44 | 1  | 0 | -3.211500 | 1.377329  | -3.360821 |
| 45 | 1  | 0 | -1.578450 | 0.853969  | -3.786881 |
| 46 | 1  | 0 | -3.203800 | 0.125369  | -1.469691 |
| 47 | 1  | 0 | -2.401119 | -1.186891 | 0.041959  |
| 48 | 77 | 0 | 1.787720  | 0.492250  | -0.130371 |
| 49 | 1  | 0 | 0.087710  | 0.923779  | -2.256501 |
| 50 | 6  | 0 | 2.450370  | 1.903570  | -1.398841 |
| 51 | 6  | 0 | 3.367870  | 0.828580  | 1.060229  |
| 52 | 7  | 0 | 0.712990  | 2.202829  | 0.598479  |
| 53 | 7  | 0 | 3.174521  | -0.990510 | -0.875801 |
| 54 | 6  | 0 | 1.741400  | 3.093400  | -1.313301 |
| 55 | 6  | 0 | 0.811610  | 3.266339  | -0.236431 |
| 56 | 6  | 0 | 0.064610  | 4.455359  | -0.022181 |
| 57 | 6  | 0 | -0.036380 | 2.336409  | 1.751869  |
| 58 | 6  | 0 | -0.026180 | 1.311919  | 2.729769  |
| 59 | 6  | 0 | -0.767100 | 1.431889  | 3.888039  |
| 60 | 6  | 0 | -1.556340 | 2.574859  | 4.126269  |
| 61 | 6  | 0 | -0.805690 | 3.520459  | 2.009419  |
| 62 | 6  | 0 | -0.758280 | 4.596999  | 1.063949  |
| 63 | 6  | 0 | -1.567210 | 3.598289  | 3.201699  |
| 64 | 6  | 0 | -1.559060 | 5.857709  | 1.265609  |
| 65 | 1  | 0 | -1.281480 | 6.363479  | 2.198539  |
| 66 | 1  | 0 | -2.633400 | 5.644129  | 1.323289  |
| 67 | 1  | 0 | -1.396600 | 6.558179  | 0.441649  |
| 68 | 1  | 0 | 0.162310  | 5.259639  | -0.745431 |
| 69 | 1  | 0 | 0.577720  | 0.435059  | 2.551599  |
| 70 | 1  | 0 | -0.735540 | 0.630819  | 4.621019  |
| 71 | 1  | 0 | -2.158030 | 4.488669  | 3.391109  |
| 72 | 1  | 0 | -2.142910 | 2.654479  | 5.037139  |
| 73 | 6  | 0 | 3.407660  | 1.962160  | -2.461971 |
| 74 | 16 | 0 | 2.230890  | 4.279600  | -2.515641 |
| 75 | 6  | 0 | 3.401110  | 3.154740  | -3.138891 |
| 76 | 1  | 0 | 4.019370  | 3.448120  | -3.978221 |
| 77 | 1  | 0 | 4.077470  | 1.149440  | -2.720981 |
| 78 | 6  | 0 | 4.394531  | -0.900380 | -0.286861 |
| 79 | 6  | 0 | 4.494450  | 0.086270  | 0.739909  |
| 80 | 6  | 0 | 5.474801  | -1.744890 | -0.660701 |
| 81 | 6  | 0 | 5.335021  | -2.704730 | -1.625031 |
| 82 | 6  | 0 | 4.050021  | -2.837600 | -2.246921 |
| 83 | 6  | 0 | 2.986921  | -1.962140 | -1.842861 |
| 84 | 6  | 0 | 1.722941  | -2.116460 | -2.459511 |
| 85 | 6  | 0 | 1.514681  | -3.079470 | -3.426311 |
| 86 | 6  | 0 | 2.556631  | -3.937030 | -3.829691 |

|     |    |   |          |           |           |
|-----|----|---|----------|-----------|-----------|
| 87  | 6  | 0 | 3.799331 | -3.810980 | -3.244881 |
| 88  | 6  | 0 | 6.492011 | -3.591850 | -2.005891 |
| 89  | 1  | 0 | 7.384101 | -3.336770 | -1.427151 |
| 90  | 1  | 0 | 6.739051 | -3.494640 | -3.070241 |
| 91  | 1  | 0 | 6.261341 | -4.648570 | -1.823521 |
| 92  | 1  | 0 | 6.425051 | -1.611860 | -0.152341 |
| 93  | 1  | 0 | 2.382931 | -4.692580 | -4.590691 |
| 94  | 1  | 0 | 4.605591 | -4.471170 | -3.547671 |
| 95  | 1  | 0 | 0.925451 | -1.455460 | -2.151751 |
| 96  | 1  | 0 | 0.529981 | -3.176101 | -3.876261 |
| 97  | 16 | 0 | 5.880320 | 0.450440  | 1.758149  |
| 98  | 6  | 0 | 3.645690 | 1.719650  | 2.147019  |
| 99  | 6  | 0 | 4.930290 | 1.625830  | 2.615899  |
| 100 | 1  | 0 | 2.920590 | 2.403270  | 2.574499  |
| 101 | 1  | 0 | 5.385710 | 2.184280  | 3.424279  |

---

**Energy**

E(RB3LYP) = -3339.45341195 Hartree

Zero point corrected free energy = -3338.665443 Hartree

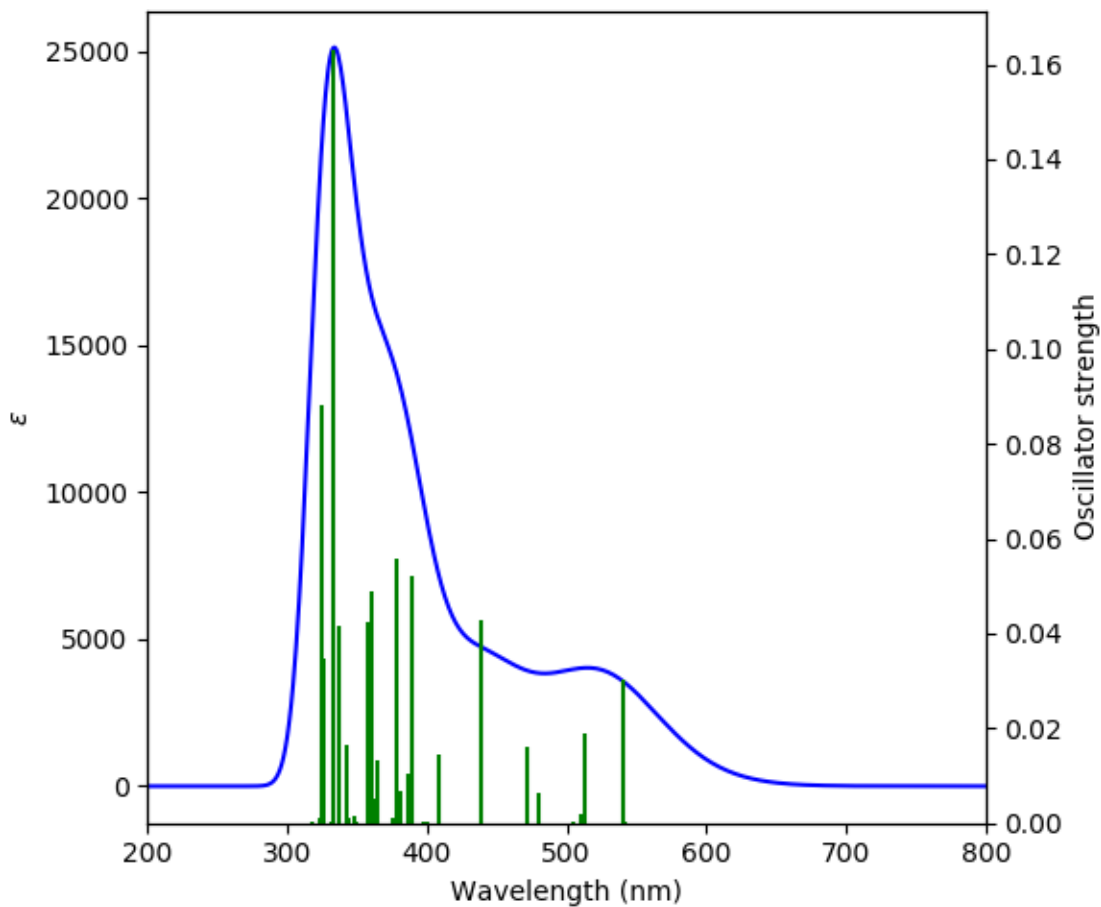

**Figure S105.** Calculated UV/vis spectrum for co-system **4•5**.

**Table S39.** Calculated energy levels of the ten highest contributing singlet states and the first four triplet states for **4•5**.

| Spin State     | Transition configurations                     | Excitation energy<br>(eV, nm) | Oscillator strength |
|----------------|-----------------------------------------------|-------------------------------|---------------------|
| S <sub>2</sub> | HOMO→LUMO+1 (97.2%)<br>HOMO-1→LUMO+1 (2.1%)   | 2.2952, 540.20                | 0.0302              |
| S <sub>3</sub> | HOMO-2→LUMO+1 (5.9%)<br>HOMO-1→LUMO+1 (52.3%) | 2.4140, 513.61                | 0.0189              |

|                 |                                                                                                                                                                        |                |        |
|-----------------|------------------------------------------------------------------------------------------------------------------------------------------------------------------------|----------------|--------|
|                 | HOMO-1→LUMO+2 (4.2%)<br>HOMO→LUMO+1 (6.0%)<br>HOMO→LUMO+2 (30.0%)                                                                                                      |                |        |
| S <sub>6</sub>  | HOMO-1→LUMO+2 (88.5%)<br>HOMO→LUMO+2 (8.8%)                                                                                                                            | 2.5853, 479.58 | 0.0064 |
| S <sub>7</sub>  | HOMO-2→LUMO+1 (87.3%)<br>HOMO-1→LUMO+1 (9.1%)                                                                                                                          | 2.6257, 472.19 | 0.0159 |
| S <sub>9</sub>  | HOMO-3→LUMO+2 (2.7%)<br>HOMO-2→LUMO+2 (92.8%)                                                                                                                          | 2.8261, 438.72 | 0.0430 |
| S <sub>13</sub> | HOMO-4→LUMO+1 (39.2%)<br>HOMO-4→LUMO+2 (10.4%)<br>HOMO-3→LUMO+1 (12.2%)<br>HOMO-3→LUMO+2 (30.8%)                                                                       | 3.1799, 389.90 | 0.0522 |
| S <sub>21</sub> | HOMO-7→LUMO+1 (4.6%)<br>HOMO-6→LUMO+1 (29.6%)<br>HOMO-4→LUMO+2 (38.5%)<br>HOMO-3→LUMO+2 (14.8%)<br>HOMO-2→LUMO+4 (2.2%)                                                | 3.4394, 360.49 | 0.0488 |
| S <sub>27</sub> | HOMO-9→LUMO+1 (2.1%)<br>HOMO-7→LUMO+1 (36.3%)<br>HOMO-6→LUMO+2 (2.2%)<br>HOMO-5→LUMO+1 (4.6%)<br>HOMO-4→LUMO+1 (2.2%)<br>HOMO-2→LUMO+4 (43.1%)<br>HOMO-1→LUMO+4 (2.8%) | 3.6131, 343.15 | 0.0164 |

|                 |                                                                                                                                                                                                                      |                |        |
|-----------------|----------------------------------------------------------------------------------------------------------------------------------------------------------------------------------------------------------------------|----------------|--------|
| S <sub>29</sub> | HOMO-7→LUMO+1 (14.7%)<br>HOMO-7→LUMO+2 (4.4%)<br>HOMO-6→LUMO+1 (2.7%)<br>HOMO-6→LUMO+2 (42.3%)<br>HOMO-2→LUMO+4 (4.7%)<br>HOMO-2→LUMO+5 (9.0%)<br>HOMO-1→LUMO+5 (15.3%)                                              | 3.7191, 333.37 | 0.1632 |
| S <sub>33</sub> | HOMO-7→LUMO+2 (66.9%)<br>HOMO-6→LUMO+2 (5.9%)<br>HOMO-3→LUMO+5 (2.3%)<br>HOMO-2→LUMO+5 (14.2%)                                                                                                                       | 3.8239, 324.23 | 0.0883 |
| T <sub>1</sub>  | HOMO-4→LUMO+2 (2.0%)<br>HOMO-3→LUMO+1 (5.8%)<br>HOMO-3→LUMO+2 (7.1%)<br>HOMO-2→LUMO+1 (18.7%)<br>HOMO-2→LUMO+2 (7.2%)<br>HOMO-1→LUMO+1 (17.3%)<br>HOMO-1→LUMO+2 (14.3%)<br>HOMO→LUMO+1 (6.7%)<br>HOMO→LUMO+2 (12.6%) | 2.0528, 603.99 | 0.0000 |
| T <sub>2</sub>  | HOMO-3→LUMO+1 (15.3%)<br>HOMO-3→LUMO+2 (3.2%)<br>HOMO-2→LUMO+1 (16.5%)<br>HOMO-2→LUMO+2 (11.0%)<br>HOMO-1→LUMO+1 (10.1%)<br>HOMO-1→LUMO+2 (17.9%)<br>HOMO→LUMO+2 (14.0%)                                             | 2.0714, 598.56 | 0.0000 |

|                |                                                                                             |                |        |
|----------------|---------------------------------------------------------------------------------------------|----------------|--------|
| T <sub>3</sub> | HOMO-3→LUMO+1 (8.7%)<br>HOMO-2→LUMO+1 (6.2%)<br>HOMO-1→LUMO+1 (3.2%)<br>HOMO→LUMO+1 (72.8%) | 2.1922, 565.57 | 0.0000 |
| T <sub>4</sub> | HOMO-1→LUMO (2.4%)<br>HOMO→LUMO (97.0%)                                                     | 2.2851, 542.57 | 0.0000 |

**Table S40.** Calculated MO energies of orbitals involved in transitions for co-system **4•5**.

| Orbital                                                                                       | Energy/<br>eV | Orbital                                                                                         | Energy/<br>eV |
|-----------------------------------------------------------------------------------------------|---------------|-------------------------------------------------------------------------------------------------|---------------|
| LUMO+5<br>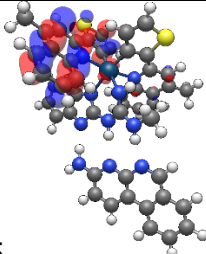  | -0.49         | HOMO<br>    | -4.48         |
| LUMO+4<br> | -0.70         | HOMO-1<br> | -4.62         |
| LUMO+3<br> | -1.02         | HOMO-2<br> | -4.86         |

|                                                                                                 |       |                                                                                                     |       |
|-------------------------------------------------------------------------------------------------|-------|-----------------------------------------------------------------------------------------------------|-------|
| 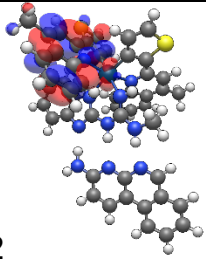 <p>LUMO+2</p> | -1.45 |  <p>HOMO-3</p>   | -5.26 |
|  <p>LUMO+1</p> | -1.64 |  <p>HOMO-4</p>   | -5.47 |
|  <p>LUMO</p>  | -1.82 |  <p>HOMO-5</p>  | -5.58 |
|                                                                                                 |       |  <p>HOMO-6</p> | -5.74 |
|                                                                                                 |       |  <p>HOMO-7</p> | -5.85 |



|  |  |                                                                                               |       |
|--|--|-----------------------------------------------------------------------------------------------|-------|
|  |  | 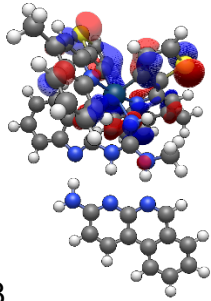<br>HOMO-8 | -6.13 |
|  |  | <br>HOMO-9 | -6.23 |

## References

- [1]- Brouwer, A. M.; Standards for photoluminescence quantum yield measurements in solution (IUPAC technical report). *Pure and Applied Chemistry* 2011, 83 (12), 2213–2228.
- [2]- Gaussian 16, Revision C.01, M. J. Frisch, G. W. Trucks, H. B. Schlegel, G. E. Scuseria, M. A. Robb, J. R. Cheeseman, G. Scalmani, V. Barone, G. A. Petersson, H. Nakatsuji, X. Li, M. Caricato, A. V. Marenich, J. Bloino, B. G. Janesko, R. Gomperts, B. Mennucci, H. P. Hratchian, J. V. Ortiz, A. F. Izmaylov, J. L. Sonnenberg, D. Williams-Young, F. Ding, F. Lipparini, F. Egidi, J. Goings, B. Peng, A. Petrone, T. Henderson, D. Ranasinghe, V. G. Zakrzewski, J. Gao, N. Rega, G. Zheng, W. Liang, M. Hada, M. Ehara, K. Toyota, R. Fukuda, J. Hasegawa, M. Ishida, T. Nakajima, Y. Honda, O. Kitao, H. Nakai, T. Vreven, K. Throssell, J. A. Montgomery, Jr., J. E. Peralta, F. Ogliaro, M. J. Bearpark, J. J. Heyd, E. N. Brothers, K. N. Kudin, V. N. Staroverov, T. A. Keith, R. Kobayashi, J. Normand, K. Raghavachari, A. P. Rendell, J. C. Burant, S. S. Iyengar, J. Tomasi, M. Cossi, J. M. Millam, M. Klene, C. Adamo, R. Cammi, J. W. Ochterski, R. L. Martin, K. Morokuma, O. Farkas, J. B. Foresman, and D. J. Fox, Gaussian, Inc., Wallingford CT, 2016.

- [3]- Y. Yang, M. N. Weaver and K. M. Merz, *The Journal of Physical Chemistry A*, 2009, **113**, 9843–9851.
- [4]- J. Tirado-Rives and W. L. Jorgensen, *Journal of Chemical Theory and Computation*, 2008, **4**, 297–306.
- [5]- M. D. Hanwell, D. E. Curtis, D. C. Lonie, T. Vandermeersch, E. Zurek and G. R. Hutchison, *Journal of Cheminformatics* **17** (2012)
- [6]- N. M. O’boyle, A. L. Tenderholt and K. M. Langner, *Journal of Computational Chemistry*, 2008, **29**, 839–845.
- [7]- Tamayo, A. B.; Alleyne, B. D.; Djurovich, P. I.; Lamansky, S.; Tsyba, I.; Ho, N. N.; Bau, R.; Thompson, M. E. *Journal of the American Chemical Society* 2003, *125* (**24**), 7377–7387.
- [8]- Balónová, B.; Martir, D. R.; Clark, E. R.; Shepherd, H. J.; Zysman-Colman, E.; Blight, B. A. *Inorganic Chemistry* 2018, *57* (**14**), 8581–8587.
- [9]- P. Thordarson. *Chem. Soc. Rev.*, 2011, **40**(3), 1305-1323.
- [10]- B. Balónová, H. J. Shepherd, C. J. Serpell and B. A. Blight, *Supramolecular Chemistry*, 2019, **32**, 1–12.
